# Supplementary material
Source: PubMed Central journal article supplement (PMC5127630)
Supplement: NIHMS831435-supplement-Supplemental_Material.pdf [file NIHMS831435-supplement-Supplemental_Material.pdf]

## Supplementary Materials for

### **PTPN22 inhibition resets defective human central B cell tolerance**

Jean-Nicolas Schickel, Marcel Kuhny, Alessia Baldo, Jason M. Bannock, Christopher Massad, Haowei Wang, Nathan Katz, Tyler Oe, Laurence Menard, Pauline Soulas-Sprauel, Till Strowig, Richard Flavell, Eric Meffre\*

Corresponding author. Email: eric.meffre@yale.edu

Published 22 July 2016, *Sci. Immunol.* **1**, aaf7153 (2016)

DOI: 10.1126/sciimmunol.aaf7153

#### **This PDF file includes:**

- Fig. S1. New emigrant B cells isolated from NSG mice engrafted with *PTPN22* C/T or T/T HSCs display normal IgH repertoire.
- Fig. S2. Defective central B cell tolerance in humanized mouse engrafted with HSCs carrying *PTPN22* T allele(s).
- Fig. S3. Overexpression of *PTPN22* variants in NSG mice.
- Fig. S4. 620W *PTPN22* overexpression interferes with the central B cell tolerance checkpoint.
- Fig. S5. Frequencies of antinuclear new emigrant B cells in *PTPN22* C/T or T/T NSG mice treated with the LTV-1 *PTPN22* inhibitor.
- Fig. S6. Inhibition of *PTPN22* expression during B cell development resets central B cell tolerance.
- Fig. S7. Representative gating strategies.
- Fig. S8. Unprocessed immunoblot images.
- Table S1. Fetal donor characteristics.
- Table S2. Repertoire and reactivity of antibodies from new emigrant B cells of mouse #1.
- Table S3. Repertoire and reactivity of antibodies from new emigrant B cells of mouse #2.
- Table S4. Repertoire and reactivity of antibodies from new emigrant B cells of mouse #3.
- Table S5. Repertoire and reactivity of antibodies from new emigrant B cells of mouse #4.

Table S6. Repertoire and reactivity of antibodies from new emigrant B cells of mouse #5.

Table S7. Repertoire and reactivity of antibodies from new emigrant B cells of mouse #6.

Table S8. Repertoire and reactivity of antibodies from new emigrant B cells of mouse #7.

Table S9. Repertoire and reactivity of antibodies from new emigrant B cells of mouse #8.

Table S10. Repertoire and reactivity of antibodies from new emigrant B cells of mouse #9.

Table S11. Repertoire and reactivity of antibodies from new emigrant B cells of mouse #10.

Table S12. Repertoire and reactivity of antibodies from GFP-negative new emigrant B cells of mouse #11.

Table S13. Repertoire and reactivity of antibodies from GFP-positive new emigrant B cells expressing 620W PTPN22 from mouse #11.

Table S14. Repertoire and reactivity of antibodies from GFP-negative new emigrant B cells of mouse #12.

Table S15. Repertoire and reactivity of antibodies from GFP-positive new emigrant B cells expressing 620W PTPN22 from mouse #12.

Table S16. Repertoire and reactivity of antibodies from GFP-negative new emigrant B cells of mouse #13.

Table S17. Repertoire and reactivity of antibodies from GFP-positive new emigrant B cells expressing 620W PTPN22 from mouse #13.

Table S18. Repertoire and reactivity of antibodies GFP-positive new emigrant B cells expressing R620 PTPN22 from mouse #14.

Table S19. Repertoire and reactivity of antibodies from GFP-positive new emigrant B cells expressing R620 PTPN22 from mouse #15.

Table S20. Repertoire and reactivity of antibodies from GFP-positive new emigrant B cells expressing 263Q PTPN22 from mouse #16.

Table S21. Repertoire and reactivity of antibodies from GFP-positive new emigrant B cells expressing 263Q PTPN22 from mouse #17.

Table S22. Repertoire and reactivity of antibodies from new emigrant B cells of mouse #18 treated with 0.75 mg of the LTV-1 PTPN22 inhibitor.

Table S23. Repertoire and reactivity of antibodies from new emigrant B cells of mouse #19 treated with 0.75 mg of the LTV-1 PTPN22 inhibitor.

Table S24. Repertoire and reactivity of antibodies from new emigrant B cells of mouse #20 treated with 0.15 mg of the LTV-1 PTPN22 inhibitor.

Table S25. Repertoire and reactivity of antibodies from new emigrant B cells of mouse #21 treated with 0.15 mg of the LTV-1 PTPN22 inhibitor.

Table S26. Repertoire and reactivity of antibodies from GFP-negative new emigrant B cells of mouse #21.

Table S27. Repertoire and reactivity of antibodies from GFP-positive new emigrant B cells expressing PTPN22 shRNA from mouse #21.

Table S28. Repertoire and reactivity of antibodies from GFP-negative new emigrant B cells of mouse #22.

Table S29. Repertoire and reactivity of antibodies from GFP-positive new emigrant B cells expressing PTPN22 shRNA from mouse #22.

Table S30. Repertoire and reactivity of antibodies from GFP-negative new emigrant B cells of mouse #23.

Table S31. Repertoire and reactivity of antibodies from GFP-positive new emigrant B cells expressing PTPN22 shRNA from mouse #23.

## Supplementary Materials

### Supplementary Figures

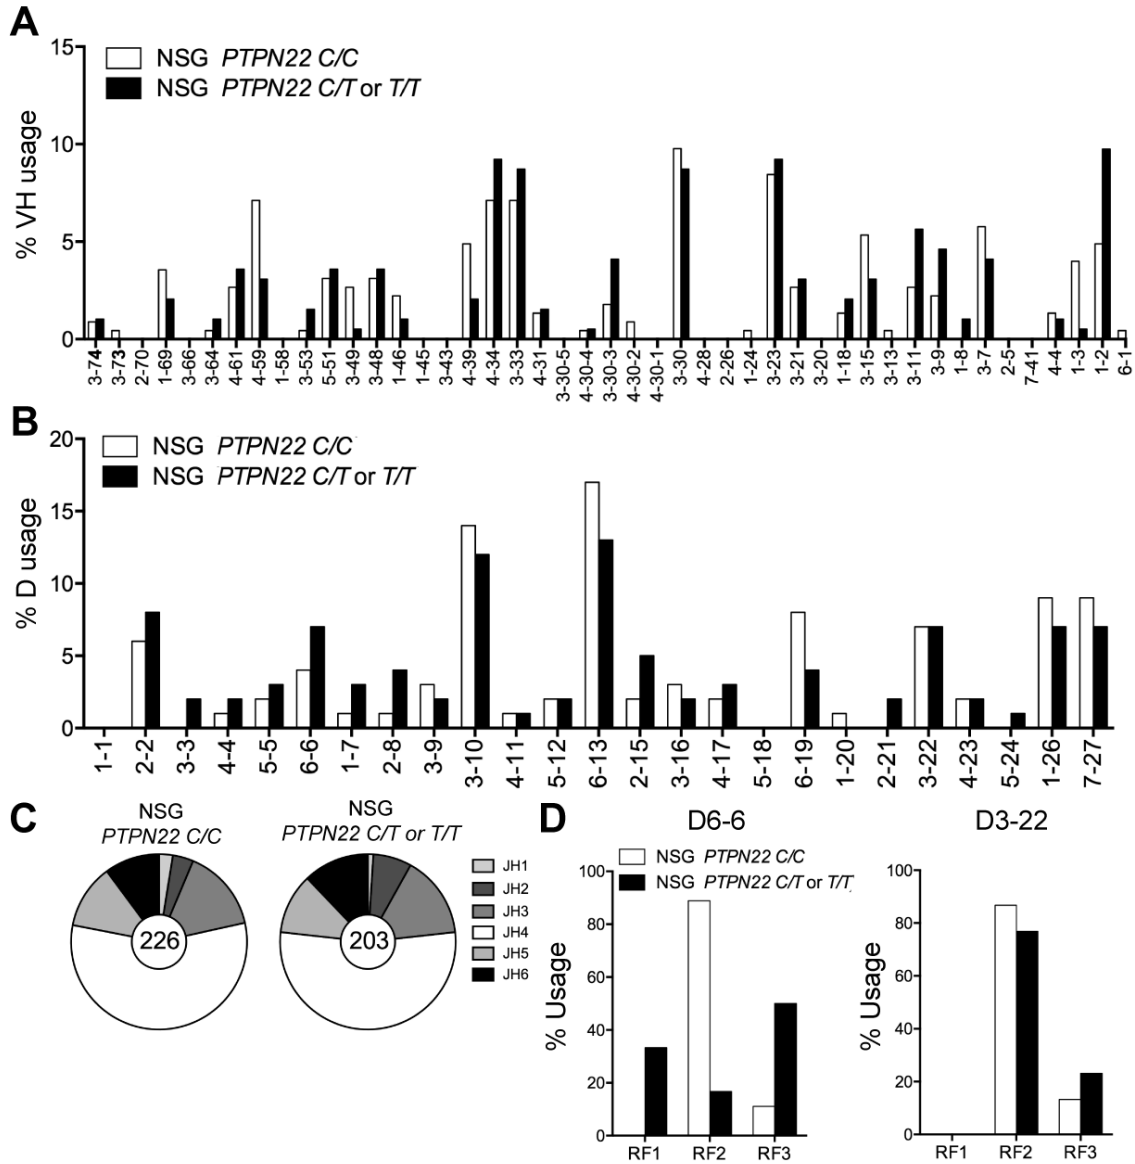

**Figure S1: New emigrant B cells isolated from NSG mice engrafted with *PTPN22* C/T or T/T HSCs display normal IgH repertoire.**

*VH* (A), *D* (B) and *JH* (C) gene-usage frequencies in new emigrant B cells are represented for 7 NSG mice engrafted with *PTPN22* C/C HSCs and 6 NSG mice

engrafted with *PTPN22* C/T or T/T HSCs. Sequences from 226 NSG *PTPN22* C/C and 203 NSG *PTPN22* C/T or T/T single transitional B cells were pooled. (D) Reading frame (RF) usages for the *D6-6* and *D3-22* genes are compared between new emigrant/transitional B cells from 7 NSG mice engrafted with *PTPN22* C/C HSCs and 6 NSG mice engrafted with *PTPN22* C/T or T/T HSCs.

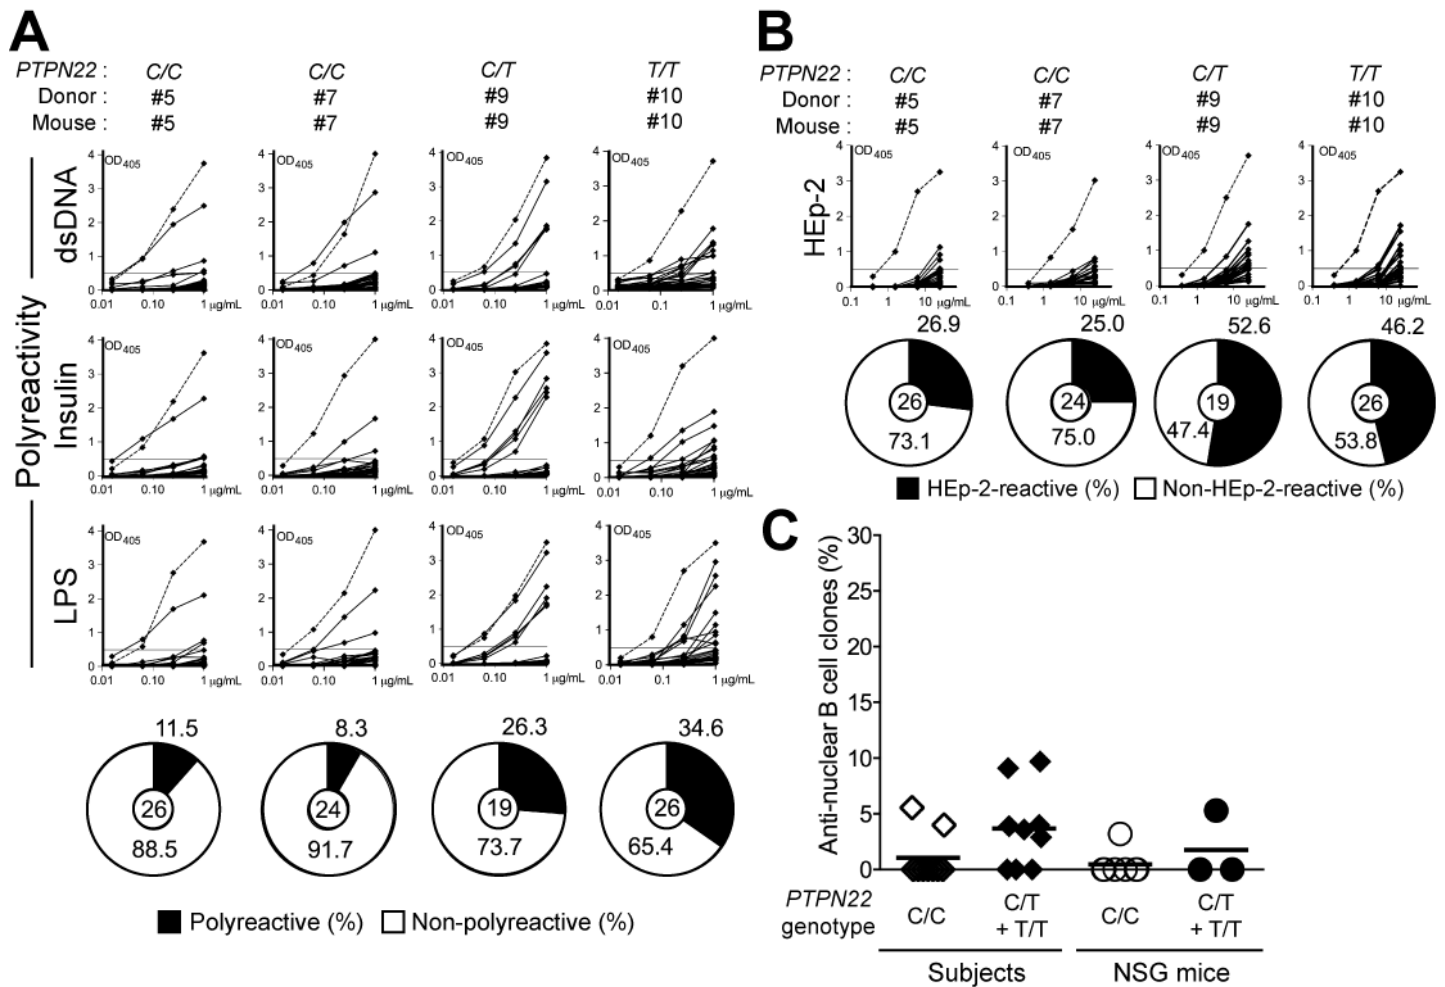

**Figure S2: Defective central B-cell tolerance in humanized mouse engrafted with HSCs carrying *PTPN22* T allele(s).**

The frequencies of polyreactive (A) and HEP-2 reactive (B) new emigrant B cells from different types of humanized mice transplanted with indicated HSCs were determined and compared to those of healthy donors carrying or not *PTPN22* T allele(s). Dotted line shows positive control. For each B-cell fraction, the frequency of reactive (filled area) and non-reactive (open area) clones is summarized in pie charts with the total number of clones tested indicated in the center. (C) The frequencies of antinuclear new emigrant B cells are compared between mouse engrafted with HSCs carrying or not the *PTPN22* T allele.

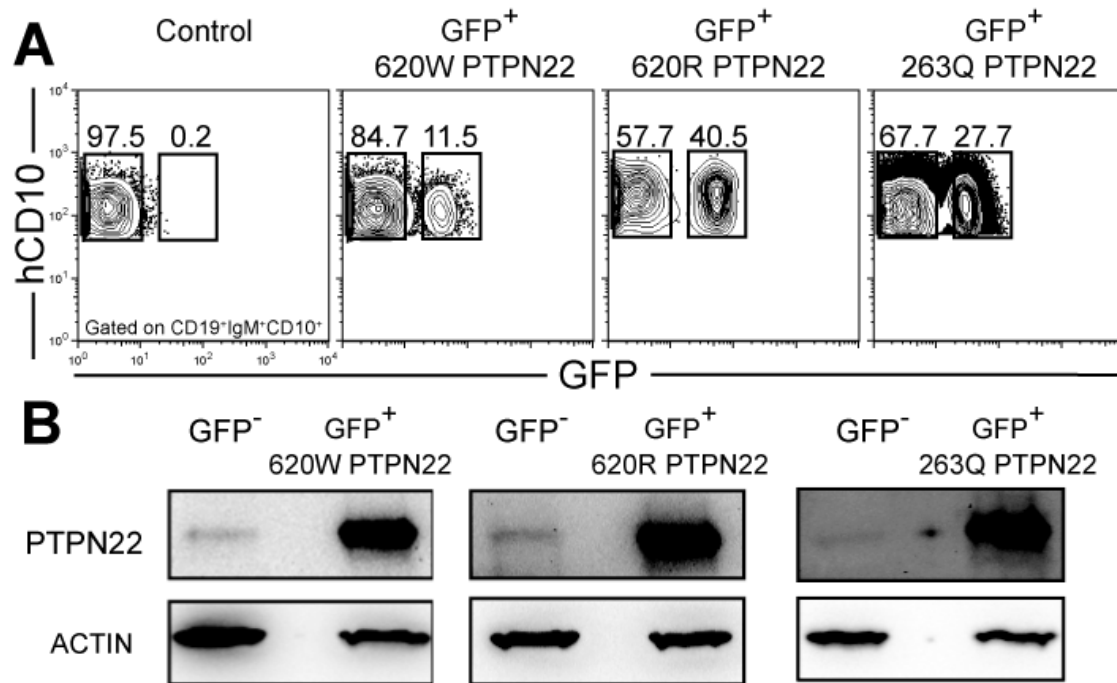

**Figure S3: Overexpression of PTPN22 variants in NSG mice.**

(A) Representative flow cytometry analysis of CD19<sup>+</sup> cells isolated from the spleen of NSG mice engrafted with HSCs transduced with a GFP-tagged lentivirus expressing 620W PTPN22, 620R PTPN22 and 263Q PTPN22. CD19<sup>+</sup> were stained with anti-hCD19, anti-IgM and anti-hCD10 antibodies. The frequencies of GFP<sup>-</sup> and GFP<sup>+</sup> shRNA<sup>+</sup> new emigrant B cells are shown. (B) Western Blot analysis of PTPN22 protein expression in hCD19<sup>+</sup> B cell isolated from PTPN22 620W, 620R or 263Q NSG mice.  $\beta$ -actin is used for normalization of protein expression

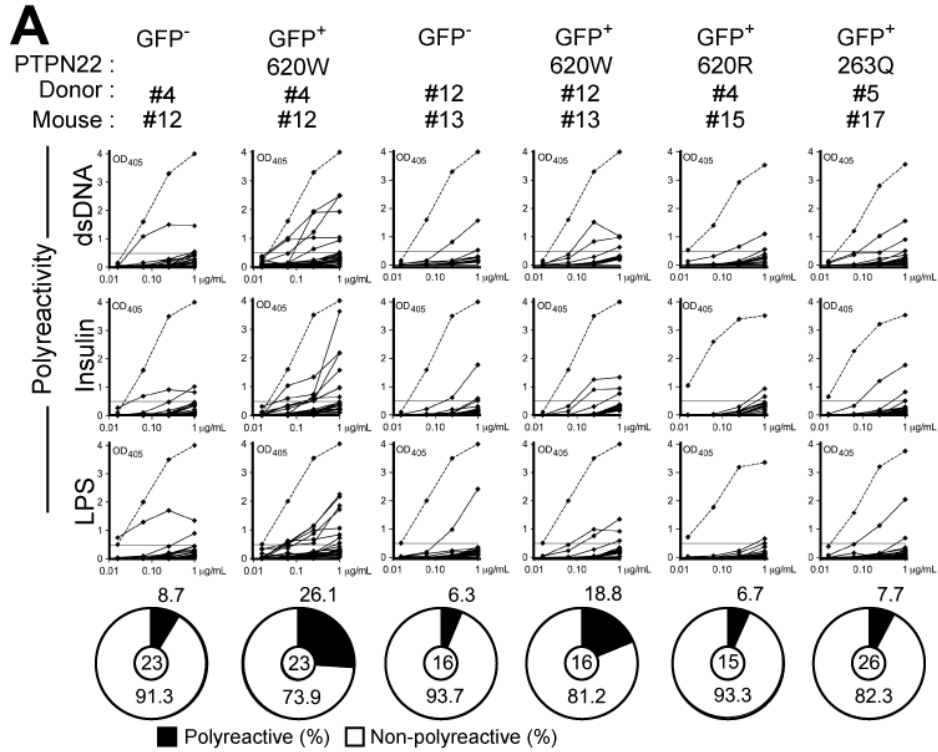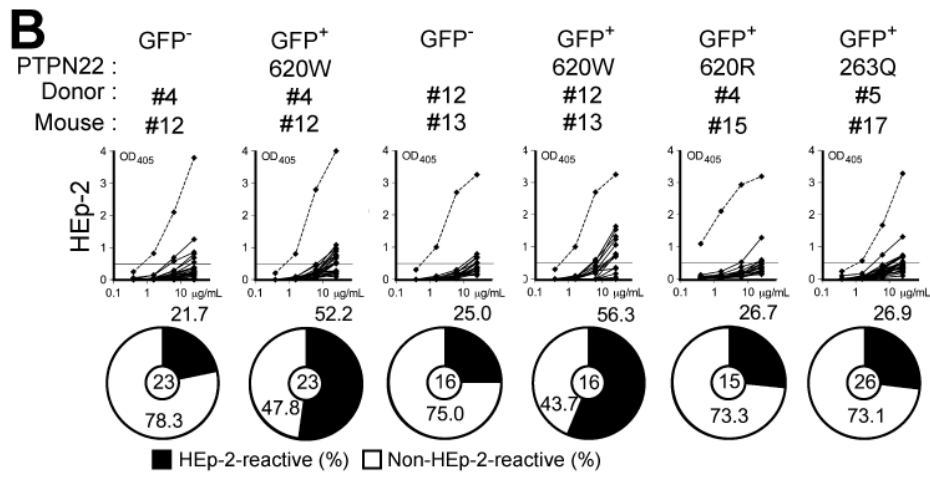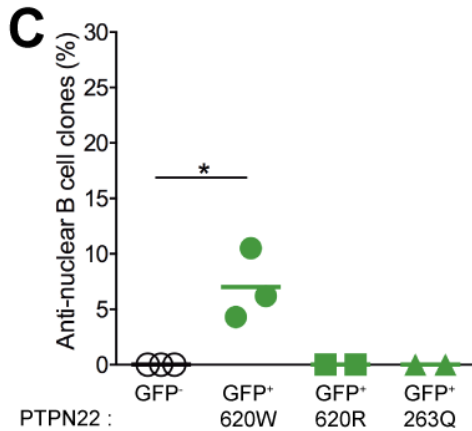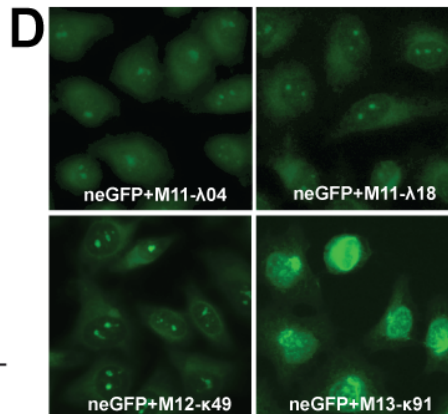



**Figure S4: 620W PTPN22 overexpression interferes with the central B cell tolerance checkpoint.**

The frequencies of polyreactive **(A)** and HEp-2 reactive **(B)** new emigrant B cells from sorted GFP<sup>+</sup> fractions expressing 620W PTPN22, 620R PTPN22 or 263Q PTPN22 were determined and compared to those of GFP<sup>-</sup> new emigrant B cells. Dotted line shows positive control. For each B-cell fraction, the frequency of reactive (filled area) and non-reactive (open area) clones is summarized in pie charts with the total number of clones tested indicated in the center. **(C)** The frequencies of antinuclear new emigrant B cells are compared between GFP<sup>-</sup> and GFP<sup>+</sup> new emigrant B cells expressing 620W PTPN22, 620R PTPN22 or 263Q PTPN22. **(D)** Autoreactive antibodies from GFP<sup>+</sup> 620W PTPN22 expressing new emigrant B cells show various patterns of anti-nuclear HEp-2 staining. Original magnification, ×40. Statistically significant differences are indicated \* P ≤ 0.05.

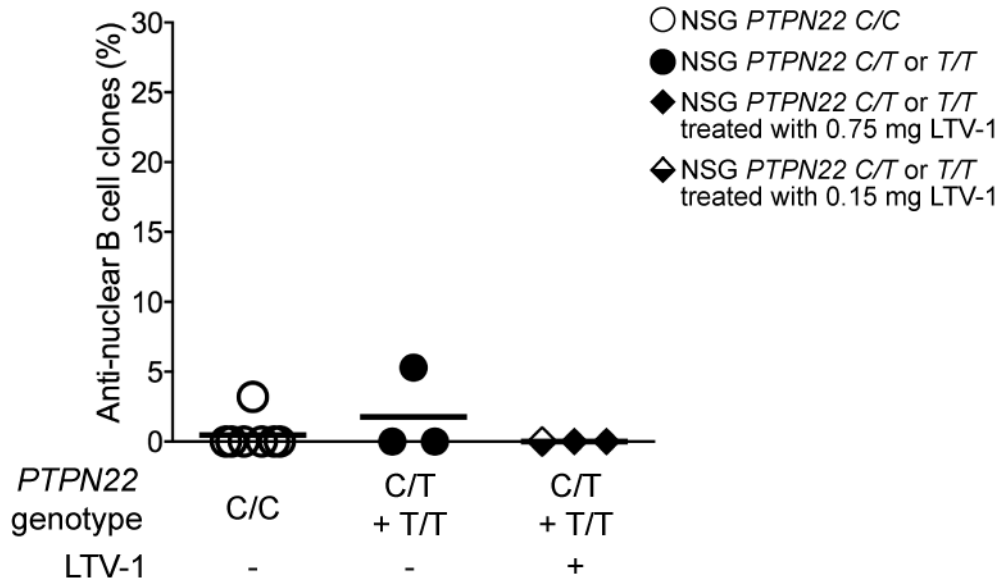

**Figure S5: Frequencies of anti-nuclear new emigrant B cells in *PTPN22* C/T or T/T NSG mice treated with the LTV-1 *PTPN22* inhibitor.**

Anti-nuclear frequencies are compared between the *PTPN22* C/T or T/T NSG mice treated or not with 0.75 mg or 0.15 mg of LTV-1 *PTPN22* inhibitor. Each symbol represents a mouse and horizontal bars denote means.

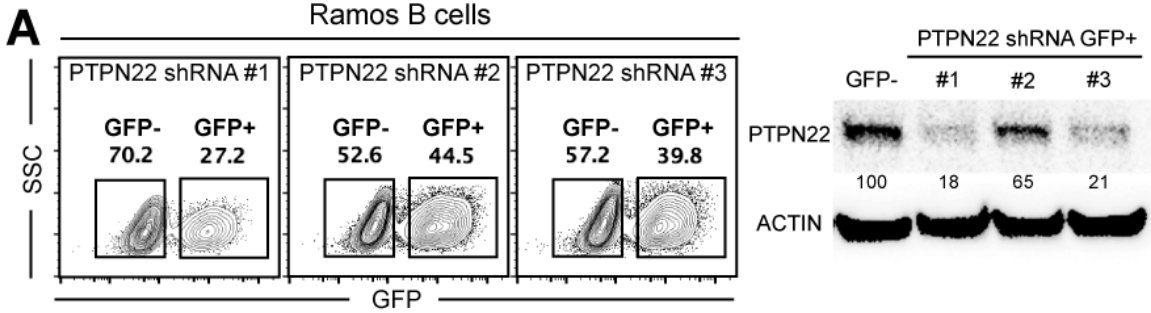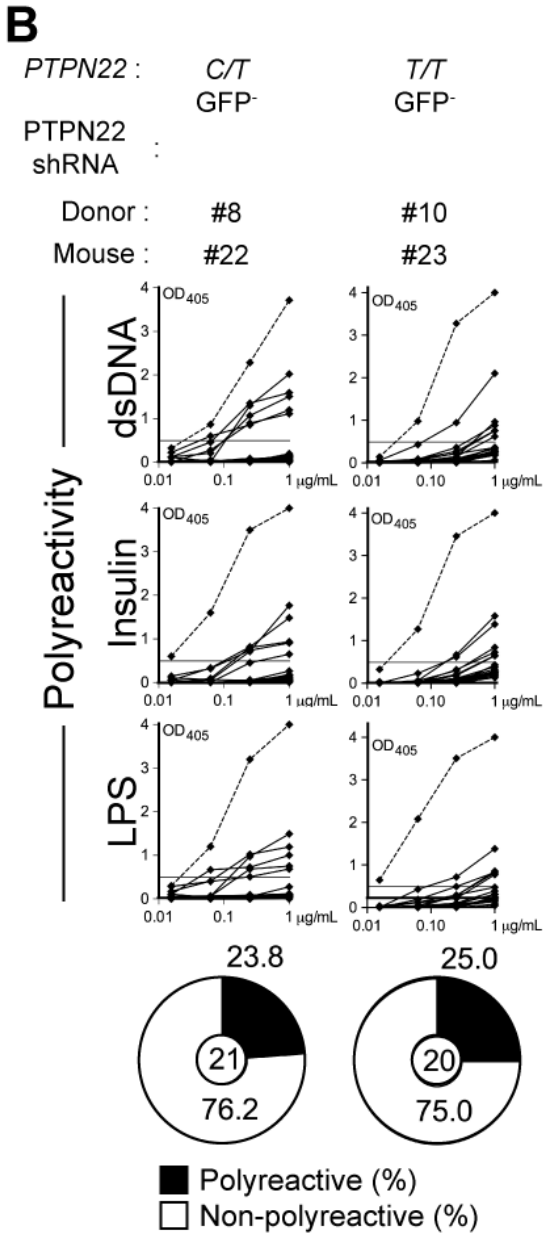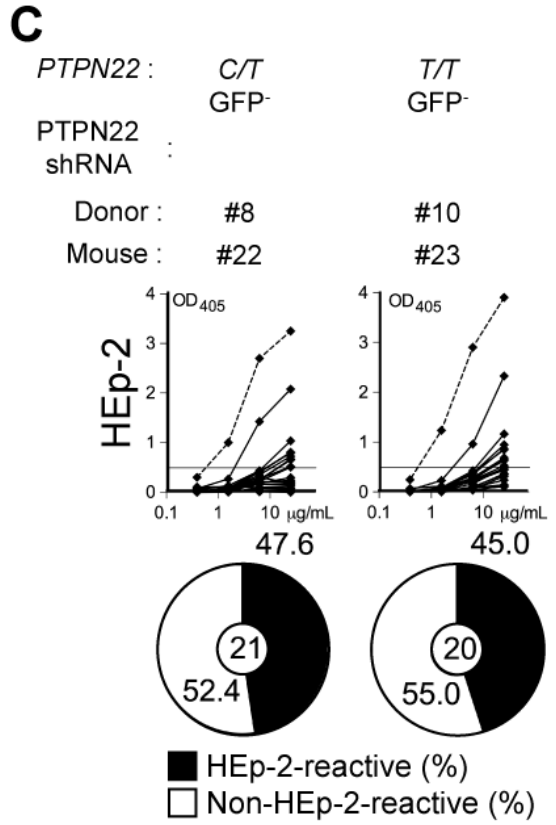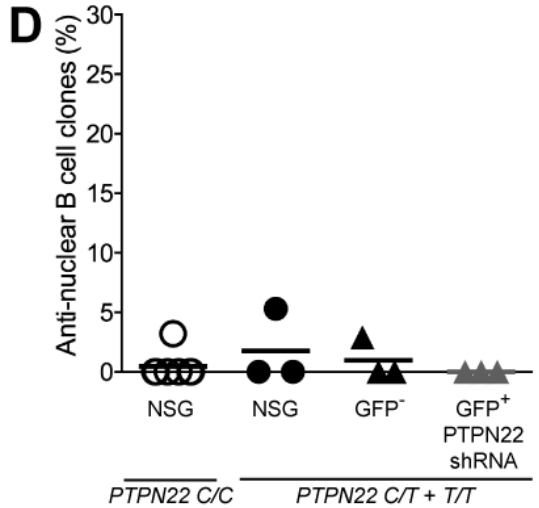

**Figure S6: Inhibition of *PTPN22* expression during B cell development resets central B cell tolerance.**

(A) Flow cytometry analysis of Ramos B cells transduction efficiency. Ramos B cells were transduced with three different GFP-tagged shRNA *PTPN22* expressing lentiviruses and probed for GFP expression. Right panel shows *PTPN22* protein expression in GFP<sup>-</sup> and GFP<sup>+</sup> shRNA<sup>+</sup> Ramos B cells.  $\beta$ -actin is used for normalization of protein expression. Percentage of knock-down is indicated. The frequencies of polyreactive (B) and HEp-2 reactive (C) new emigrant B cells from sorted GFP<sup>-</sup> fractions were determined. Dotted line shows positive control. For each B-cell fraction, the frequency of reactive (filled area) and non-reactive (open area) clones is summarized in pie charts with the total number of clones tested indicated in the center. (D) The frequencies of antinuclear new emigrant B cells are compared between GFP<sup>-</sup> and GFP<sup>+</sup> shRNA<sup>+</sup> new emigrant B cells.

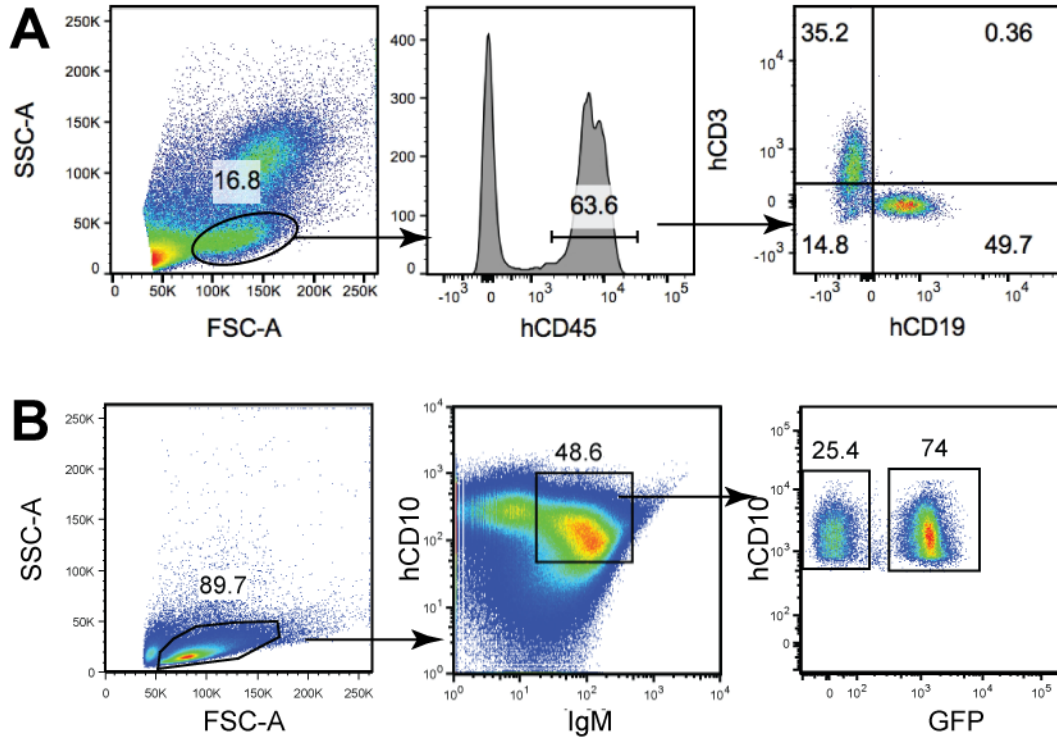

**Figure S7: Representative gating strategies.** (A) Representative flow cytometry analysis of the frequency of human CD45<sup>+</sup>, CD3<sup>+</sup> and CD19<sup>+</sup> cells in the blood NSG mice. (B) Representative flow cytometry analysis of CD19<sup>+</sup> cells isolated from the spleen of NSG mouse engrafted with HSCs transduced with GFP-tagged lentiviruses. CD19<sup>+</sup> B cells were stained with anti-hCD19, anti-IgM and anti-hCD10 antibodies.

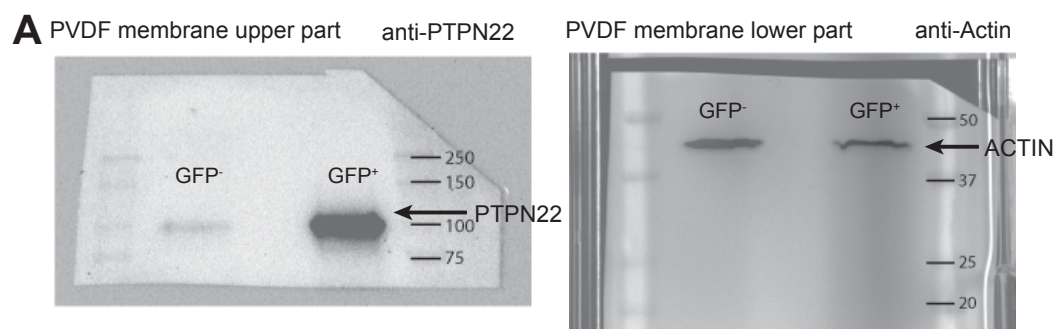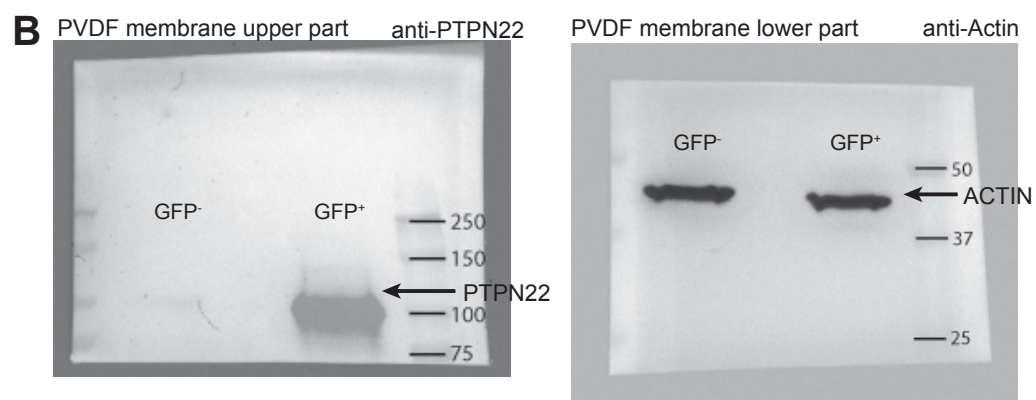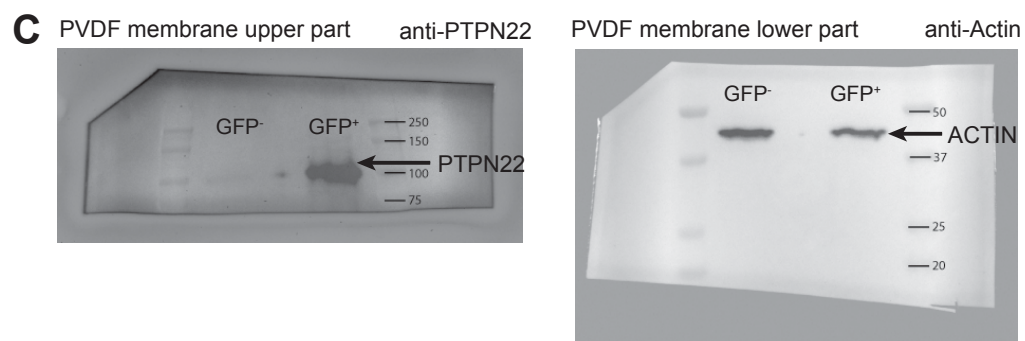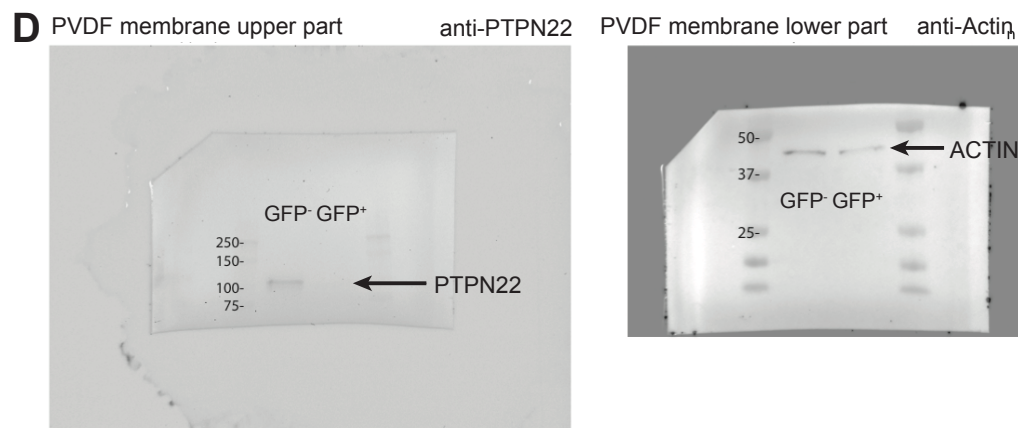

**Figure S8: Unprocessed immunoblot images.** Western Blot analysis of PTPN22 (left image) and ACTIN (right image) protein expression in GFP<sup>-</sup> and GFP<sup>+</sup> overexpressing 620W PTPN22 (A), 620R PTPN22 (B) and 263Q PTPN22 (C) hCD19<sup>+</sup> cells isolated from the spleen of NSG mice. (D) PTPN22 (left image) and ACTIN (right image) protein expression in GFP<sup>-</sup> and GFP<sup>+</sup> shRNA<sup>+</sup> hCD19<sup>+</sup> cells isolated from the spleen of NSG mice.

## Supplementary Tables

**Table S1:** Fetal donor characteristics

| Donor # | PTPN22 genotype | Age (days) | Gender |
|---------|-----------------|------------|--------|
| 1       | C/C             | 105        | Female |
| 2       | C/C             | 115        | Female |
| 3       | C/C             | 108        | Male   |
| 4       | C/C             | 110        | Female |
| 5       | C/C             | 120        | Male   |
| 6       | C/C             | 137        | Female |
| 7       | C/C             | 112        | Female |
| 8       | C/T             | 122        | Female |
| 9       | C/T             | 125        | Female |
| 10      | T/T             | 105        | Female |
| 11      | C/C             | 111        | Female |
| 12      | C/C             | 108        | Female |
| 13      | C/T             | 125        | Female |

C/C: homozygote for the *PTPN22* C allele in position 1858

C/T: heterozygote for the *PTPN22* T allele in position 1858

T/T: homozygote for the *PTPN22* T allele in position 1858



**Table S2:** Repertoire and reactivity of antibodies from new emigrant B cells of Mouse #1

| Ig        | HEAVY  |      |    |    |                     |        | LIGHT |    |              |        |      | REACTIVITY |          |  |
|-----------|--------|------|----|----|---------------------|--------|-------|----|--------------|--------|------|------------|----------|--|
|           | VH     | D    | RF | JH | CDR3(aa)            | Length | Vκ    | Jκ | CDR3(aa)     | Length | Poly | HEp-2      | Staining |  |
| neM1-K2   | 1-3    | 1-7  | 2  | 4  | DLELYYFDY           | 9      | 3-20  | 1  | QQYGSSPT     | 8      | -    | -          | -        |  |
| neM1-K5   | 4-30-2 | 3-10 | 2  | 4  | ISGSYYNY            | 8      | 1-39  | 1  | QQSYSTPWT    | 9      | -    | +          | -        |  |
| neM1-K8   | 4-59   | 3-9  | 2  | 4  | SPPFDWIYYFDY        | 12     | 3-20  | 1  | QQYGSSPWT    | 9      | -    | -          | -        |  |
| neM1-K9   | 3-73   | 4-23 | 2  | 4  | RYGGNYFFDY          | 10     | 3-11  | 4  | QQRSNWPLT    | 9      | -    | +          | -        |  |
| neM1-K1   | 3-15   | 1-26 | 1  | 3  | QTEWELDAFDI         | 11     | 3-20  | 4  | QQYGSSPPLT   | 10     | -    | -          | -        |  |
| neM1-K11  | 3-74   | 3-10 | 2  | 6  | DPGKGYGSGSYYYYYGMDV | 20     | 1-6   | 2  | LQDYNYPYT    | 9      | -    | -          | -        |  |
| neM1-K16  | 4-30-2 | /    | /  | 3  | TNEPNAFDI           | 9      | 2-28  | 4  | MQALQTPLT    | 9      | -    | -          | -        |  |
| neM1-K22  | 4-4    | 3-22 | 2  | 3  | DRADYDSSGYYYAFDI    | 17     | 1-17  | 4  | LQHNSYPPT    | 9      | -    | -          | -        |  |
| neM1-K23  | 3-7    | 1-26 | 2  | 6  | NRPPGAINYYGMDV      | 14     | 3-11  | 1  | QQRSNWPWT    | 9      | -    | -          | -        |  |
| neM1-K25  | 4-34   | 1-26 | 3  | 4  | GGGATEY             | 7      | 1-17  | 1  | LQHNSYLWT    | 9      | -    | -          | -        |  |
| neM1-K32  | 4-59   | /    | /  | 3  | THPQSDAFDI          | 10     | 2-30  | 4  | MQGTHWPLT    | 9      | -    | +          | -        |  |
| neM1-K33# | 3-7    | 3-10 | 3  | 3  | ILGGITMVRGAEDAFDI   | 17     | 3-20  | 1  | QQYGSSPRT    | 9      |      |            |          |  |
| neM1-K37  | 3-30   | 3-10 | 1  | 4  | EKGWFELEGLAIDY      | 15     | 3-15  | 1  | QQYNWPQT     | 9      | -    | -          | -        |  |
| neM1-K38  | 4-34   | 7-27 | 2  | 2  | GLTGDSGTDWYFDL      | 14     | 1-39  | 4  | QQSYSTPLT    | 9      | -    | -          | -        |  |
| neM1-K4   | 4-39   | 6-13 | 2  | 4  | HPYSSSFDY           | 9      | 3-20  | 2  | QQYGSSYT     | 8      | -    | -          | -        |  |
| neM1-K42  | 3-33   | 3-10 | 2  | 6  | DPRLGSGSYYYYYGMDV   | 16     | 1-39  | 3  | QQSYSTPFT    | 9      | -    | +          | -        |  |
| neM1-K43# | 4-30-4 | 7-27 | 2  | 4  | NKLNWGLDY           | 9      | 1-5   | 1  | QQYNSYSPWT   | 10     |      |            |          |  |
| neM1-K45  | 4-4    | 7-27 | 2  | 5  | GWGFGNWFDP          | 10     | 3-20  | 2  | QQYGSSPPYT   | 10     | -    | -          | -        |  |
| neM1-K46  | 4-59   | /    | /  | 4  | SFSRLASFDY          | 10     | 3-20  | 1  | QQYGSSLGT    | 9      | -    | -          | -        |  |
| neM1-K48  | 4-59   | /    | /  | 4  | VGGRGGDFDY          | 10     | 1-33  | 3  | QQYDNLPRVT   | 10     | -    | -          | -        |  |
|           | VH     | D    | RF | JH | CDR3(aa)            | Length | Vλ    | Jλ | CDR3(aa)     | Length | Poly | HEp-2      | Staining |  |
| neM1-L1   | 3-30   | 6-13 | 2  | 4  | SGSSWYYFDY          | 10     | 2-14  | 2  | SSYTSSTV     | 9      | -    | -          | -        |  |
| neM1-L3   | 1-69   | /    | /  | 4  | VMAVYYFDY           | 9      | 1-40  | 1  | QSYDSSLGYV   | 11     | +    | +          | -        |  |
| neM1-L6   | 3-30-3 | 3-16 | 2  | 4  | GPSRGGEVFDY         | 11     | 3-21  | 3  | QVWDSSSDQNWV | 12     | -    | -          | -        |  |
| neM1-L7   | 5-51   | 3-22 | 2  | 4  | LRIPDYDSSGYFFDY     | 15     | 2-8   | 3  | SSYAGSNNLV   | 10     | -    | -          | -        |  |
| neM1-L12  | 4-4    | /    | /  | 4  | GSIPSDYYFDY         | 11     | 3-25  | 2  | QSADSSGTYPV  | 11     | -    | -          | -        |  |
| neM1-L13# | 1-69   | 6-13 | 2  | 5  | TIYSSSWYWFDP        | 12     | 5-37  | 2  | MIWPSNAYVV   | 10     |      |            |          |  |
| neM1-L14  | 3-30   | 3-22 | 2  | 2  | DYYDSSGYYYWYFDL     | 15     | 1-44  | 2  | AAWDDSLNGPV  | 11     | -    | +          | -        |  |
| neM1-L24  | 3-13   | 6-13 | 2  | 3  | GGRDSSWYIAFDI       | 13     | 2-23  | 1  | CSYAGSSTYV   | 10     | -    | +          | -        |  |
| neM1-L26  | 1-3    | 7-27 | 2  | 5  | GQTTNLGMGPNWFDP     | 15     | 1-40  | 2  | QSYDSSLGVV   | 11     | -    | -          | -        |  |
| neM1-L27  | 3-23   | 2-15 | 2  | 3  | DPLSRYCSGGSCYSGAFDI | 19     | 1-44  | 2  | AAWDDSLNGHVV | 12     | -    | -          | -        |  |
| neM1-L28  | 1-18   | 6-19 | 3  | 4  | GIAVAGYFDY          | 10     | 2-8   | 2  | SSYAGSNNLV   | 10     | -    | -          | -        |  |
| neM1-L3   | 3-7    | /    | /  | 4  | DRLGSFDY            | 8      | 1-47  | 3  | AAWDDSLSGWV  | 11     |      |            |          |  |
| neM1-L31  | 3-33   | 3-9  | 2  | 4  | DAALRYFDWLLDY       | 13     | 2-14  | 1  | SSYTSSTLV    | 10     | -    | -          | -        |  |
| neM1-L34  | 3-7    | /    | /  | 4  | DLVGIRATDY          | 10     | 1-51  | 1  | GTWDSSLSAYV  | 11     | -    | +          | -        |  |
| neM1-L35  | 3-30   | 6-13 | 3  | 1  | DVNAAAGNRAYFQH      | 14     | 3-21  | 1  | QVWDSSSDHYV  | 11     | -    | -          | -        |  |
| neM1-L36  | 3-30   | 1-26 | 2  | 4  | DGDSGSYFDY          | 10     | 2-23  | 2  | CSYAGSSTYV   | 11     | -    | -          | -        |  |
| neM1-L39  | 3-30-3 | 7-27 | 1  | 3  | VCSPELGQWIDI        | 12     | 3-21  | 2  | QVWDSSSDHV   | 11     | -    | +          | -        |  |
| neM1-L41  | 3-15   | 3-16 | 2  | 3  | DWGTRAFDI           | 9      | 1-51  | 3  | GTWDSSLSAGV  | 11     | -    | -          | -        |  |
|           | VH     | D    | RF | JH | CDR3(aa)            | Length |       |    |              |        |      |            |          |  |
| neM1-H4   | 3-64   | 6-19 | 3  | 4  | GIVAVAGNLDY         | 11     |       |    |              |        |      |            |          |  |

RF, reading frame: # antibody failed to be expressed

- non reactive; +, reactive

c, diffuse cytoplasmic staining; N, nuclear staining, F, cytoplasmic fibers; V, vesicles

**Table S3:** Repertoire and reactivity of antibodies from new emigrant B cells of Mouse #2

| Ig         | HEAVY |      |    |    |                     |        | LIGHT |    |               |        | REACTIVITY |       |          |
|------------|-------|------|----|----|---------------------|--------|-------|----|---------------|--------|------------|-------|----------|
|            | VH    | D    | RF | JH | CDR3(aa)            | Length | Vκ    | Jκ | CDR3(aa)      | Length | Poly       | HEp-2 | Staining |
| neM2- K04# | 3-33  | 3-16 | 1  | 3  | PRPRGEPLLNWSWAFDI   | 17     | 1-5   | 1  | QHYNPYSRT     | 9      |            |       |          |
| neM2- K08  | 3-33  | 1-26 | 3  | 4  | AEEGVGGSYFDY        | 12     | 2-24  | 1  | MQATQFPWT     | 9      | -          | -     | -        |
| neM2- K10  | 4-31  | 3-22 | 2  | 3  | NPAREYYDSSGYGYAFDI  | 20     | 4-1   | 2  | QQYYSTPFMYT   | 11     | -          | -     | -        |
| neM2- K12  | 3-11  | 2-2  | 3  | 4  | ARERGVVPAIVGDY      | 16     | 4-1   | 2  | QQYYSAPQT     | 9      | -          | -     | -        |
| neM2- K13  | 4-34  | 2-8  | 2  | 4  | GQQDNAPHTPLYY       | 13     | 2-28  | 2  | MQALQTPT      | 8      | -          | -     | -        |
| neM2- K14  | 3-9   | 6-6  | 2  | 3  | GTHTSSGAFDI         | 12     | 4-1   | 4  | QQYYSTPLT     | 9      | -          | -     | -        |
| neM2- K15  | 3-7   | 2-2  | 3  | 3  | VSHIVVPAAIRGGDAFDI  | 19     | 4-1   | 3  | QQYYSTPCT     | 9      | +          | +     | -        |
| neM2- K16  | 3-15  | 1-26 | 3  | 4  | DPVGACVFDY          | 10     | 3-20  | 4  | QQYGSSPLT     | 9      | -          | -     | -        |
| neM2- K18  | 3-23  | 3-22 | 2  | 3  | TVDYDSSGYYSYAFDI    | 17     | 3-20  | 3  | QQYGSSPPT     | 9      | -          | -     | -        |
| neM2- K24  | 3-21  | 2-8  | 2  | 4  | GGDDSRSPNGGYCLDY    | 16     | 2-29  | 2  | MQGIHLRYT     | 9      | -          | -     | -        |
| neM2- K25  | 3-11  | 1-26 | 3  | 4  | EGPVGIVGHHYPFDY     | 15     | 1-39  | 1  | QQSYSTPWT     | 9      | -          | -     | -        |
| neM2- K26  | 1-2   | 3-3  | 3  | 5  | GSIGVGGSLYGNWFDP    | 16     | 1-16  | 4  | QQYNSYPLT     | 9      | -          | -     | -        |
| neM2- K27  | 4-39  | 7-27 | 3  | 4  | RGLGIVHYFDY         | 11     | 3-11  | 4  | QQRINWLT      | 8      | -          | -     | -        |
| neM2- K29  | 1-2   | 6-13 | 3  | 3  | LWGGIKPGIAAAGTAFDI  | 18     | 3-20  | 1  | QQYGSSPRT     | 9      | -          | +     | -        |
| neM2- K30  | 1-46  | 4-23 | 2  | 4  | ARLAEHYQRYGGNSGPFYD | 19     | 3-20  | 1  | QQYGSSPGT     | 9      | -          | +     | N        |
| neM2- K35# | 4-34  | 3-10 | 3  | 5  | RGKLTMDRGNWFDP      | 14     | 2-28  | 2  | MQALQTPT      | 8      |            |       |          |
| neM2- K38  | 3-49  | 3-10 | 2  | 4  | DHLIGSGSYFDY        | 12     | 3-20  | 2  | QQYGSSPQT     | 9      | -          | +     | -        |
| neM2- K41  | 3-49  | 6-13 | 3  | 4  | DPLEGKSIAAAGPWDFDY  | 18     | 2-30  | 2  | MQGTHWPPYT    | 10     | -          | +     | -        |
| neM2- K48# |       |      |    |    |                     |        | 1-39  | 2  | QQSYSTPYT     | 9      |            |       |          |
|            | VH    | D    | RF | JH | CDR3(aa)            | Length | Vλ    | Jλ | CDR3(aa)      | Length | Poly       | HEp-2 | Staining |
| neM2- L01  | 3-48  | 6-19 | 3  | 4  | GIAVAGESVDY         | 11     | 1-44  | 3  | AWDDSLNGPV    | 10     | -          | -     | -        |
| neM2- L2   | 1-2   | 1-26 | 2  | 4  | LRDSGSSYFDY         | 11     | 2-18  | 2  | SSYTSSSNVV    | 10     | -          | -     | -        |
| neM2- L04  | 3-33  | 3-16 | 1  | 3  | PRPRGEPLLNWSWAFDI   | 17     | 2-8   | 2  | SSYAGSNNLV    | 10     | -          | -     | -        |
| neM2- L05# | 3-53  | 6-13 | 2  | 4  | AGYSSWSAFDY         | 12     | 1-51  | 2  | TWSSLSAVV     | 10     |            |       |          |
| neM2- L07  | 1-46  | 6-13 | 3  | 6  | DKAAAGTDYYYGMDV     | 15     | 6-57  | 2  | QSYDSSNHVV    | 10     | -          | -     | -        |
| neM2- L09  | 3-9   | 6-13 | 2  | 5  | DRAGYSSSDWFDP       | 13     | 1-40  | 2  | QSYDSSLGSGV   | 11     | -          | -     | -        |
| neM2- L17  | 3-33  | 6-13 | 3  | 4  | DTAAAGLQSRYYFDY     | 15     | 2-11  | 1  | CSYAGSYTYV    | 10     | -          | -     | -        |
| neM2- L19  | 3-30  | 4-17 | 2  | 4  | DPCSDYGDYFDY        | 13     | 1-40  | 2  | YDSSLGSGVV    | 10     | +          | +     | -        |
| neM2- L22  | 3-9   | 6-13 | 3  | 4  | DMAAAGPYFDY         | 12     | 2-14  | 2  | SSYTSSSTFGV   | 11     | -          | -     | -        |
| neM2- L23  | 3-15  | 6-19 | 3  | 4  | VHARIAVAARNDY       | 13     | 2-14  | 2  | SSFTSITYVV    | 10     | -          | -     | -        |
| neM2- L28  | 4-59  | 5-24 | 2  | 1  | DGGDGYKYGYFQH       | 13     | 1-44  | 3  | AWDDSLNGVV    | 10     | -          | -     | -        |
| neM2- L31  | 3-23  | 1-26 | 3  | 4  | VWGATTMGGHYFDY      | 14     | 2-14  | 2  | SSYTSSSTFVV   | 11     | -          | -     | -        |
| neM2- L33  | 4-34  | 3-10 | 3  | 5  | RGKLTMDRGNWFDP      | 14     | 2-23  | 1  | AGSSTFHVV     | 9      | -          | +     | -        |
| neM2- L40  | 3-7   | 6-19 | 3  | 4  | DVRIAVAGFDY         | 11     | 3-1   | 2  | QAWDSSTVV     | 9      | -          | +     | -        |
| neM2- L42  | 3-11  | 7-27 | 1  | 2  | RQLGLSIEYWYFDL      | 14     | 9-49  | 3  | GADHGSGSNFVWV | 13     | -          | +     | -        |
| neM2- L44  | 3-9   | 6-19 | 2  | 5  | ALGRYSSGWTGWDFDP    | 15     | 1-51  | 3  | GTWSSLSAPWV   | 12     | -          | -     | -        |
| neM2- L47# | 3-23  | 1-26 | 2  | 2  | GGGSPWGWYFDL        | 12     | 2-8   | 1  | SSYAGSNNFYV   | 11     |            |       |          |
| neM2- L32# |       |      |    |    |                     |        | 2-8   | 1  | SSYAGSNNYV    | 10     |            |       |          |
|            | VH    | D    | RF | JH | CDR3(aa)            | Length |       |    |               |        |            |       |          |
| neM2- H37  | 1-69  | 2-2  | 2  | 4  | ASHHRNTYCSSTSCFDY   | 17     |       |    |               |        |            |       |          |
| neM2- H46  | 3-23  | 1-26 | 3  | 4  | VWGATTMGGHYFDY      | 14     |       |    |               |        |            |       |          |
| neM2- H06  | 4-34  | 6-19 | 2  | 4  | GGMVDSSGWYFDY       | 14     |       |    |               |        |            |       |          |
| neM2- H20  | 3-33  | 3-22 | 2  | 4  | DISLYYYDSSGYSAGVFDY | 19     |       |    |               |        |            |       |          |

RF, reading frame: # antibody failed to be expressed

- non reactive; +, reactive

c, diffuse cytoplasmic staining; N, nuclear staining, F, cytoplasmic fibers; V, vesicles

**Table S4:** Repertoire and reactivity of antibodies from new emigrant B cells of Mouse #3

| Ig        | HEAVY |      |    |    |                   |        | LIGHT |    |               |        | REACTIVITY |       |          |
|-----------|-------|------|----|----|-------------------|--------|-------|----|---------------|--------|------------|-------|----------|
|           | VH    | D    | RF | JH | CDR3(aa)          | Length | Vκ    | Jκ | CDR3(aa)      | Length | Poly       | HEp-2 | Staining |
| neM3 K02  | 4-39  | /    | /  | 2  | PRGRYWYFDL        | 10     | 1-33  | 2  | QQHDNLPYT     | 9      | -          | -     | -        |
| neM3 K03  | 4-34  | 6-19 | 2  | 4  | GLGVSGWFDY        | 10     | 3-20  | 3  | QQYGSSPFT     | 9      | -          | -     | -        |
| neM3 K08  | 5-a   | /    | /  | 6  | HQARPYYYYGMDV     | 13     | 3-20  | 2  | QQYGSSPKT     | 9      | -          | -     | -        |
| neM3 K09  | 4-59  | 7-27 | 3  | 3  | VSGDAFDI          | 8      | 1-9   | 4  | QQLNSYPLT     | 9      | -          | -     | -        |
| neM3 K11  | 1-69  | 7-27 | 2  | 5  | ANWGSYNWFDP       | 11     | 3-11  | 4  | QQRSNWPT      | 8      | -          | -     | -        |
| neM3 K15  | 4-59  | 7-27 | 2  | 2  | DLSWGPYWYFDL      | 12     | 3-15  | 3  | QQYNNWPFT     | 9      | -          | -     | -        |
| neM3 K16  | 4-39  | 6-13 | 2  | 3  | QPGQYSSSWYAFDI    | 14     | 1-33  | 3  | QQYDNLPIFT    | 10     | -          | -     | -        |
| neM3 K18  | 1-18  | 1-7  | 3  | 4  | DRWAGITGTPFDY     | 14     | 3-15  | 3  | QQYNNWPFT     | 10     | -          | -     | -        |
| neM3 K21  | 3-23  | 5-12 | 2  | 4  | YSGYDFTYFDY       | 12     | 1-8   | 3  | QQYYSFPFT     | 9      | -          | +     | -        |
| neM3 K22  | 4-61  | 6-19 | 2  | 4  | RDSAYSSGFDY       | 11     | 2-28  | 4  | MQALQTPLT     | 9      | -          | -     | -        |
| neM3 K27  | 4-39  | /    | /  | 4  | AVFIDY            | 6      | 3-15  | 2  | QQYNNWPYT     | 9      | +          | +     | -        |
| neM3 K30  | 3-23  | 7-27 | 1  | 4  | DPPELGMGESGFDY    | 14     | 1-5   | 1  | QQYNSYSRT     | 9      | -          | -     | -        |
| neM3 K32  | 4-61  | 4-4  | 2  | 4  | DLGSNYDY          | 8      | 3-10  | 1  | QQYGSSPQT     | 9      | -          | -     | -        |
| neM3 K33  | 3-23  | 6-13 | 2  | 4  | DPRSSWYFDY        | 10     | 1-39  | 3  | QQSYSTPFT     | 9      | -          | -     | -        |
| neM3 K34  | 3-30  | 6-13 | 3  | 2  | DRIAAAGTWYFDL     | 13     | 1-33  | 4  | QQYDNLPLT     | 10     | -          | -     | -        |
| neM3 K37  | 3-33  | /    | /  | 4  | GAGYYFDY          | 8      | 3-11  | 1  | QQRSNWRGT     | 9      | -          | +     | -        |
| neM3 K38  | 3-30  | 7-27 | 2  | 4  | DSSAHEPSWG YFDY   | 14     | 3-15  | 4  | QQYNNWPLT     | 9      | -          | -     | -        |
| neM3 K40  | 1-3   | 6-13 | 2  | 4  | DLGADSSSWTFDY     | 13     | 3-15  | 2  | QQYNNWPMYT    | 10     | -          | +     | -        |
| neM3 K41  | 3-30  | /    | /  | 5  | GHPKGNWFDP        | 10     | 3-20  | 2  | QQYGSSRYT     | 9      | -          | +     | -        |
| neM3 K42# | 4-59  | 3-10 | 1  | 4  | APRFGELYFDY       | 11     | 3-15  | 1  | QQYNNWWT      | 8      |            |       |          |
| neM3 K46# | 1-69  | 1-26 | 3  | 4  | AVGATVDFDY        | 10     | 3-11  | 4  | QQRSNWLT      | 8      |            |       |          |
|           | VH    | D    | RF | JH | CDR3(aa)          | Length | Vλ    | Jλ | CDR3(aa)      | Length | Poly       | HEp-2 | Staining |
| neM3 L4#  | 4-59  | 5-5  | 2  | 4  | QPGYSYGFYD        | 10     | 2-11  | 2  | CSYAGSYVV     | 9      |            |       |          |
| neM3 L12# | 3-11  | 1-26 | 1  | 5  | DGWELYHWDFP       | 11     | 2-23  | 2  | CSYAGRV       | 7      |            |       |          |
| neM3 L17# | 4-59  | 3-22 | 2  | 4  | GRDTTKASYDSSGYYY  | 17     | 3-21  | 1  | QVWDSSSDHYV   | 11     |            |       |          |
| neM3 L19  | 1-24  | 1-14 | 2  | 3  | VLYPGNAFDI        | 10     | 1-47  | 1  | AAWDDSLSGYV   | 11     | -          | -     | -        |
| neM3 L24  | 4-39  | 1-26 | 2  | 4  | NSGSYYFDY         | 9      | 2-23  | 1  | CSYAGSSTYV    | 10     | -          | -     | -        |
| neM3 L25# | 1-69  | 1-26 | 2  | 4  | DSSAYS S GSY YFDY | 14     | 1-51  | 2  | GTWDSSLSAVV   | 11     |            |       |          |
| neM3 L31# | 5-51  | 6-13 | 2  | 4  | RGSSSWG YFDY      | 11     | 1-51  | 1  | GTWDSSLSV     | 9      |            |       |          |
| neM3 L7   |       |      |    |    |                   |        | 9-49  | 1  | GADHGSGSNFVYV | 13     |            |       |          |
| neM3 L10  |       |      |    |    |                   |        | 3-21  | 2  | QVWDSSSDHV    | 11     |            |       |          |
| neM3 L29  |       |      |    |    |                   |        | 3-1   | 1  | QAWDSSTYV     | 9      |            |       |          |
| neM3 L36  |       |      |    |    |                   |        | 3-25  | 1  | QSADSSGTYGV   | 11     |            |       |          |
| neM3 L43  |       |      |    |    |                   |        | 2-23  | 2  | CSYAGSSTLV    | 10     |            |       |          |
|           | VH    | D    | RF | JH | CDR3(aa)          | Length |       |    |               |        |            |       |          |
| neM3 K13  | 4-31  | 6-13 | 3  | 6  | DLAGTNY YGMDV     | 13     |       |    |               |        |            |       |          |
| neM3 L20  | 1-69  | 6-19 | 2  | 1  | HYSSRAEYFQH       | 11     |       |    |               |        |            |       |          |
| neM3 L26  | 5-51  | 4-4  | 2  | 4  | RRDYSNYDY         | 9      |       |    |               |        |            |       |          |
| neM3 L45  | 5-51  | 3-10 | 2  | 6  | ANGSGSYNY YGMDV   | 16     |       |    |               |        |            |       |          |
| neM3 K47  | 3-33  | 4-4  | 2  | 4  | GTAHSNYSGFDY      | 12     |       |    |               |        |            |       |          |

RF, reading frame: # antibody failed to be expressed

- non reactive; +, reactive

c, diffuse cytoplasmic staining; N, nuclear staining, F, cytoplasmic fibers; V, vesicles

**Table S5:** Repertoire and reactivity of antibodies from new emigrant B cells of Mouse #4

| Ig        | HEAVY |      |    |    |                       |        | LIGHT |    |              |        | REACTIVITY |       |          |
|-----------|-------|------|----|----|-----------------------|--------|-------|----|--------------|--------|------------|-------|----------|
|           | VH    | D    | RF | JH | CDR3(aa)              | Length | Vk    | Jk | CDR3(aa)     | Length | Poly       | HEp-2 | Staining |
| neM4-K49  | 4-59  | 3-10 | 2  | 5  | QGVTSAYNWFDP          | 12     | 1-39  | 2  | QQSYSTPRYT   | 10     | -          | -     | -        |
| neM4-K61  | 1-2   | /    | /  | 4  | DGPAGVGVGFDY          | 12     | 1-39  | 4  | RQSYSTPRLT   | 10     | -          | -     | -        |
| neM4-K62  | 1-2   | 1-20 | 3  | 3  | GFSASTGTTDAFDI        | 15     | 3-11  | 1  | QQRSNWPPWT   | 10     | -          | +     | -        |
| neM4-K66# | 3-49  | 3-9  | 1  | 5  | DFQPWGYFDWPLNWFDP     | 17     | 3-20  | 1  | QQYGSSPRT    | 9      |            |       |          |
| neM4-K72  | 3-7   | 6-13 | 3  | 6  | VRRGGAAAGIVDWYYYYGMDV | 21     | 1-39  | 4  | QQSYSTPLT    | 9      | -          | -     | -        |
| neM4-K74  | 1-46  | 6-6  | 2  | 4  | RRYSSSFYD             | 9      | 3-20  | 1  | QQYGSSPT     | 8      |            | -     | -        |
| neM4-K75  | 1-2   | 2-2  | 3  | 5  | ANIVVVPAAMYNWFDP      | 16     | 1-9   | 4  | QQLNSYPLT    | 9      | -          | +     | -        |
| neM4-K77  | 3-30  | 6-13 | 3  | 4  | VRGGIAAGFLAGENGSDY    | 20     | 2-28  | 3  | MQALLTQFT    | 9      | -          | -     | -        |
| neM4-K79  | 3-30  | 3-9  | 2  | 5  | DWADYDILTSQSGPYWFDP   | 20     | 1-8   | 1  | QQYYSYPQT    | 9      | -          | -     | -        |
| neM4-K81# | 1-3   | 4-11 | 3  | 5  | NPTTITTIWFNP          | 13     | 1D-8  | 4  | QQYYSFPLT    | 9      |            |       |          |
| neM4-K83  | 3-21  | 6-6  | 3  | 4  | VPGSIAARPNFLDY        | 14     | 1-17  | 2  | LQHNSYPVT    | 9      | +          | +     | -        |
| neM4-K85  | 4-61  | 3-22 | 2  | 6  | GPGYYYDSSGPPYGMVDV    | 17     | 1-9   | 4  | QQLNSYPPT    | 9      | -          | -     | -        |
| neM4-K88  | 3-23  | 2-2  | 2  | 2  | VGCSSTSCYEDFDL        | 14     | 1-39  | 2  | QQSYSTPYT    | 9      | -          | -     | -        |
| neM4-K90  | 3-48  | /    | /  | 4  | DRNSVDY               | 7      | 3-15  | 1  | QQYNNWPPWT   | 10     | -          | -     | -        |
|           | VH    | D    | RF | JH | CDR3(aa)              | Length | Vλ    | Jλ | CDR3(aa)     | Length | Poly       | HEp-2 | Staining |
| neM4-L52  | 3-33  | 6-6  | 2  | 4  | DPDLRYSSSSSFYD        | 14     | 2-23  | 1  | CSYAGSSTPNYV | 13     | -          | -     | -        |
| neM4-L53  | 3-30  | /    | /  | 6  | LHAPNLYMDV            | 11     | 1-51  | 3  | GTWDSLSAGV   | 11     | -          | -     | -        |
| neM4-L54  | 3-30  | 2-2  | 2  | 4  | DCLGTWRYCSSTSCSVGADY  | 20     | 1-44  | 2  | AAWDDSLNGVV  | 11     | +          | +     | -        |
| neM4-L55  | 3-30  | 6-13 | 3  | 5  | DKGSAAADNWFDP         | 13     | 3-21  | 1  | QVWDSSSDHYV  | 11     | -          | -     | -        |
| neM4-L58  | 4-59  | 6-19 | 1  | 4  | MKRLGIDY              | 9      | 3-21  | 1  | QVWDSSSDHYV  | 11     | -          | -     | -        |
| neM4-L63  | 3-30  | 6-13 | 3  | 6  | SYEGIAADKNYYYYGMDV    | 19     | 6-57  | 2  | QSYDSSNQV    | 9      | -          | -     | -        |
| neM4-L67  | 3-21  | 2-2  | 3  | 5  | APRGVPAANWFDP         | 13     | 2-14  | 3  | SSYTRSSTLV   | 10     | -          | -     | -        |
| neM4-L76# | 4-34  | 2-2  | 3  | 3  | ACERDIVVPAVNGAFDI     | 18     | 2-14  | 2  | SSYTSSTRV    | 10     |            |       |          |
| neM4-L78# | 3-23  | 2-15 | 3  | 3  | DLNKTSLAAAGDRDAFDI    | 18     | 1-51  | 2  | GTWDSLSAGV   | 11     |            |       |          |
| neM4-L89# | 3-48  | /    | /  | 4  | DRNSVDY               | 7      | 1-51  | 2  | GTWDSLSAGVV  | 12     |            |       |          |

RF, reading frame: # antibody failed to be expressed

- non reactive; +, reactive

c, diffuse cytoplasmic staining; N, nuclear staining, F, cytoplasmic fibers; V, vesicles

**Table S6:** Repertoire and reactivity of antibodies from new emigrant B cells of Mouse #5

| Ig        | HEAVY  |      |    |    |                         |        | LIGHT |    |               |        | REACTIVITY |       |          |
|-----------|--------|------|----|----|-------------------------|--------|-------|----|---------------|--------|------------|-------|----------|
|           | VH     | D    | RF | JH | CDR3(aa)                | Length | Vκ    | Jκ | CDR3(aa)      | Length | Poly       | HEp-2 | Staining |
| neM5-H08  | 3-74   | /    | /  | 3  | EGSLNHDAFDI             | 11     | 3-15  | 1  | QQYNNWPPWT    | 10     | -          | -     | -        |
| neM5-H12  | 1-2    | 6-19 | 3  | 4  | GSTENRIAVAGRPGVGADY     | 19     | 3-20  | 4  | QQYGSSPMQS    | 10     | -          | -     | -        |
| neM5-H17  | 3-33   | 3-10 | 2  | 4  | GPSSGVPPAFDY            | 12     | 1-5   | 1  | QQYNSYSRT     | 9      | -          | -     | -        |
| neM5-H19  | 4-39   | 1-26 | 2  | 4  | RWTGGSYGY               | 9      | 1-39  | 3  | QQSYSTPFT     | 9      | -          | -     | -        |
| neM5-H21# | 5-10   | 5-5  | 2  | 4  | LVREERYSYGLTNRDDY       | 17     | 3-20  | 2  | QQYGSSPPNT    | 10     |            |       |          |
| neM5-H34  | 3-33   | 6-13 | 2  | 5  | VDNSSSPYNWFDP           | 13     | 1-39  | 3  | QQSYSTPFT     | 9      | -          | -     | -        |
| neM5-H35  | 4-61   | 4-23 | 3  | 2  | RTVVGKKGDWYFDL          | 14     | 3-20  | 4  | QQYGSSLT      | 8      | -          | -     | -        |
| neM5-H37  | 3-15   | 2-8  | 2  | 6  | EAYCTGGVCYTGVLGYYYYYMDV | 23     | 1-39  | 1  | QQSYSTPTRGMT  | 12     | +          | +     | -        |
| neM5-H38  | 3-33   | 1-7  | 3  | 4  | DTGITGTFDY              | 10     | 1-17  | 2  | LQHNSYPYT     | 9      | -          | -     | -        |
| neM5-H45  | 4-59   | 3-22 | 2  | 4  | GRAQDSSGPNPLDY          | 14     | 3-11  | 4  | QQRSNWPLT     | 9      | -          | -     | -        |
| neM5-H46  | 3-48   | 3-9  | 2  | 4  | DLHDYDILTYGYIFDY        | 16     | 1-39  | 1  | QQSYSTPWT     | 9      | -          | -     | -        |
|           | VH     | D    | RF | JH | CDR3(aa)                | Length | Vλ    | Jλ | CDR3(aa)      | Length | Poly       | HEp-2 | Staining |
| neM5-H01  | 4-34   | 6-6  | 2  | 6  | GFKWSGRNSSSSLNYYYYMDV   | 21     | 3-25  | 2  | QSADSSGTYVV   | 11     | -          | +     | -        |
| neM5-H03  | 4-34   | 7-27 | 1  | 4  | GPRLGTARKPFDY           | 13     | 9-49  | 3  | GADHGSGSNFVWV | 13     | +          | +     | -        |
| neM5-H04  | 3-30   | 7-27 | 1  | 4  | LGSDYKPFDY              | 10     | 1-51  | 1  | GTWDDSLSAYV   | 11     | -          | -     | -        |
| neM5-H05  | 6-19   | /    | /  | 4  | VEGLSVVGLPY             | 11     | 1-47  | 2  | AWDDSLSGVV    | 10     | -          | -     | -        |
| neM5-H06# | 3-30-3 | 3-10 | 2  | 6  | DRGSGSYLTYYYYYGMDV      | 18     | 2-14  | 1  | SSYTSSTYV     | 10     |            |       |          |
| neM5-H07  | 3-23   | /    | /  | 4  | DELPIDDESERFDY          | 15     | 1-44  | 2  | AAWDDSLNGVV   | 11     | -          | +     | -        |
| neM5-H09  | 3-48   | 5-12 | 2  | 4  | SKTDVADHLPRYSGYDPGNY    | 20     | 1-44  | 3  | AAWDDSLNGWV   | 11     | -          | -     | -        |
| neM5-H11  | 4-34   | 4-17 | 2  | 4  | APGDSTRMVDY             | 11     | 1-44  | 2  | AAWDDSLNGRV   | 11     | -          | -     | -        |
| neM5-H13# | 5-51   | 2-2  | 2  | 6  | WYANLGYCSSTSCYTAGMDV    | 20     | 2-11  | 1  | CSYAGSSYV     | 9      |            |       |          |
| neM5-H15  | 3-21   | 6-6  | 2  | 4  | DLDEYSSVPPFDY           | 13     | 2-8   | 1  | SSYAGSNNYV    | 10     | -          | -     | -        |
| neM5-H23# | 4-31   | 2-15 | 3  | 3  | QIVVVDAIRDAFDI          | 15     | 1-47  | 2  | AAWDDSLSGVV   | 11     |            |       |          |
| neM5-H24# | 3-15   | 6-13 | 2  | 3  | SDSSSWGAFDI             | 11     | 1-40  | 2  | QSYDSSLGGSV   | 11     |            |       |          |
| neM5-H25  | 3-15   | 3-16 | 2  | 4  | DVWGSYRYLDY             | 11     | 1-44  | 3  | AAWDDSLNGPV   | 11     | -          | -     | -        |
| neM5-H26  | 3-15   | 1-20 | 3  | 4  | GWITGTSPDFDY            | 12     | 2-14  | 1  | SSYTSSTLYV    | 11     | -          | -     | -        |
| neM5-H27  | 4-34   | 4-17 | 2  | 4  | GDLHGDLDY               | 9      | 6-57  | 2  | QSYDSNVV      | 8      | -          | -     | -        |
| neM5-H28  | 1-2    | 6-19 | 2  | 6  | GGSGWSPPNYYYYMDV        | 16     | 2-23  | 2  | CSYAGSSTYVV   | 11     | -          | +     | -        |
| neM5-H31  | 3-30-3 | 2-2  | 3  | 4  | DPVVVPAAMWGTFDY         | 15     | 3-1   | 1  | QAWDSSTNYV    | 10     | -          | -     | -        |
| neM5-H41  | 3-23   | /    | /  | 3  | GAPRGAFDI               | 9      | 3-21  | 3  | QVWDDSSDHRV   | 11     | -          | +     | -        |
| neM5-H43  | 1-46   | 3-16 | 2  | 5  | ERDYVWGSYRYTGPWFDP      | 18     | 2-11  | 1  | CSYAGSYTYV    | 10     | +          | +     | -        |
| neM5-H48  | 3-7    | 6-13 | 3  | 4  | GRYGAIAAGTVLDY          | 15     | 2-23  | 2  | CSYAGSSSVV    | 10     | -          | -     | -        |
|           | VH     | D    | RF | JH | CDR3(aa)                | Length |       |    |               |        |            |       |          |
| neM5-H33  | 3-49   | 2-15 | 3  | 4  | QDIDIVVVAATPRGIDY       | 18     |       |    |               |        |            |       |          |

RF, reading frame: # antibody failed to be expressed

- non reactive; +, reactive

c, diffuse cytoplasmic staining; N, nuclear staining; F, cytoplasmic fibers; V, vesicles

**Table S7:** Repertoire and reactivity of antibodies from new emigrant B cells of Mouse #6

| Ig        | HEAVY |      |    |    |                       | LIGHT  |      |    |             | REACTIVITY |      |       |          |
|-----------|-------|------|----|----|-----------------------|--------|------|----|-------------|------------|------|-------|----------|
|           | VH    | D    | RF | JH | CDR3(aa)              | Length | Vκ   | Jκ | CDR3(aa)    | Length     | Poly | HEp-2 | Staining |
| neM6-K1   | 5-51  | 6-13 | 3  | 5  | GIAAAGTWFDP           | 11     | 3-15 | 4  | QQYNNWPPLT  | 10         | -    | -     | -        |
| neM6-K2   | 1-3   | 3-22 | 2  | 4  | DPFRRFGGYDSSGGYYDY    | 18     | 3-15 | 2  | QQYNNWPPYT  | 10         | -    | -     | -        |
| neM6-K3   | 6-1   | 6-13 | 3  | 5  | GIAAAGTPYWFDP         | 13     | 1-39 | 1  | QQSYSTRTF   | 9          | -    | -     | -        |
| neM6-K4   | 3-15  | 4-23 | 3  | 4  | GAAVVTPY              | 8      | 3-20 | 1  | QQYGSSPWT   | 9          | -    | -     | -        |
| neM6-K13  | 3-23  | 3-22 | 2  | 6  | EKDYYDSSGRTSNYYYYGMDV | 21     | 1-39 | 3  | QQSYSTPFT   | 9          | -    | -     | -        |
| neM6-K17  | 4-34  | 7-27 | 2  | 6  | RMTANWDYYYYGMDV       | 15     | 3-20 | 4  | QQYGSSSPLT  | 9          | -    | -     | -        |
| neM6-K18  | 3-7   | 1-1  | 2  | 5  | DAKYNWWDGRS WFDP      | 16     | 1D-8 | 2  | QQYYSFPYT   | 9          | -    | -     | -        |
| neM6-K22  | 1-3   | 6-13 | 3  | 3  | DSSIAAAGTSDAFDI       | 15     | 1-5  | 2  | QQYNSYSYT   | 9          | -    | -     | -        |
| neM6-K29# | 1-3   | 4-11 | 3  | 5  | DRTTVTTINWFDP         | 13     | 1-17 | 4  | LQHNSYPLT   | 9          |      |       |          |
| neM6-K37# | 3-21  | 3-22 | 3  | 4  | SKINSPVTMIVGAKGFDY    | 19     | 3-15 | 3  | QQYNNWPFT   | 9          |      |       |          |
| neM6-K38  | 4-34  | 3-16 | 2  | 6  | VRMLGDYDYVHYYYGMDV    | 18     | 3-11 | 2  | QQRSNWPRYT  | 10         | -    | +     | -        |
| neM6-K39  | 3-7   | /    | /  | 4  | DTPAGRSY              | 8      | 1-17 | 2  | LQHNSYPYT   | 9          | -    | +     | -        |
| neM6-K41  | 3-49  | 6-6  | 2  | 4  | PHSSSSDYFDY           | 11     | 1D-8 | 3  | QQYYSFPFPT  | 10         | -    | -     | -        |
| neM6-K12# |       |      |    |    |                       |        | 1-5  | 1  | QQYNSYSTFG  | 10         |      |       |          |
| neM6-K15# |       |      |    |    |                       |        | 3-15 | 3  | QQYNNWPFT   | 9          |      |       |          |
|           | VH    | D    | RF | JH | CDR3(aa)              | Length | Vλ   | Jλ | CDR3(aa)    | Length     | Poly | HEp-2 | Staining |
| neM6-λ6   | 3-30  | 2-2  | 3  | 3  | VLTVVPAADDAFDI        | 14     | 3-21 | 2  | QVWDSSSDHVV | 11         | -    | -     | -        |
| neM6-λ8   | 4-30  | 5-5  | 3  | 4  | IIVDTIFDY             | 9      | 2-23 | 2  | CSYAGSSTLV  | 10         | -    | +     | -        |
| neM6-λ11  | 3-11  | /    | /  | 4  | DPKGIGY               | 8      | 1-51 | 2  | GTWDSSLSAVV | 11         | -    | -     | -        |
| neM6-λ16# | 1-69  | 7-27 | 3  | 2  | DRTQLGNTGTYYWYFDL     | 17     | 2-11 | 3  | CSYAGSYTWV  | 10         |      |       |          |
| neM6-λ20  | 1-3   | 6-19 | 2  | 6  | ERVRR LAVAGPYYYYYGMDV | 20     | 1-40 | 1  | QSYDSSLGGYV | 11         | +    | +     | -        |
| neM6-λ24  | 3-23  | 6-13 | 2  | 6  | KGSSSQYYYYYGMVDV      | 16     | 2-14 | 2  | SSYTSSSTVV  | 10         | -    | -     | -        |
| neM6-λ25  | 3-30  | 6-13 | 2  | 6  | YGYSSWYYYYYGMDV       | 16     | 2-8  | 2  | SSYAGSNNLV  | 10         | -    | -     | -        |
| neM6-λ27  | 3-9   | 3-10 | 2  | 4  | ALYYYGSGSYFDY         | 13     | 2-14 | 2  | SSYTSSSTHVV | 11         | -    | +     | -        |
| neM6-λ32  | 4-30  | 3-10 | 3  | 4  | LRARGVIDY             | 9      | 3-1  | 3  | QAWDSSTAV   | 10         | -    | -     | -        |
| neM6-λ33  | 3-15  | 6-13 | 2  | 3  | GGSSSWWDAFDI          | 13     | 2-8  | 1  | SSYAGSNNYV  | 10         | -    | -     | -        |
| neM6-λ36  | 1-2   | 6-6  | 2  | 3  | NSSSAFDI              | 9      | 2-23 | 3  | CSYAGSST    | 8          | -    | -     | -        |
| neM6-λ19  |       |      |    |    |                       |        | 3-10 | 2  | YSTDSSGNHRV | 11         |      |       |          |
| neM6-λ28  |       |      |    |    |                       |        | 3-21 | 1  | QVWDSSSDHYV | 11         |      |       |          |
| neM6-λ31  |       |      |    |    |                       |        | 1-40 | 3  | QSYDSSLGWV  | 11         |      |       |          |
| neM6-λ26  |       |      |    |    |                       |        | 1-47 | 3  | AAWDDSLGWV  | 11         |      |       |          |
|           | VH    | D    | RF | JH | CDR3(aa)              | Length |      |    |             |            |      |       |          |
| neM6-H34  | 4-30  | 2-15 | 2  | 6  | YCSGGSCYGMDV          | 12     |      |    |             |            |      |       |          |
| neM6-H36  | 1-2   | 6-6  | 2  | 3  | NSSSAFDI              | 9      |      |    |             |            |      |       |          |
| neM6-H40  | 3-23  | /    | /  | 4  | SFSGGDYDY             | 9      |      |    |             |            |      |       |          |
| neM6-H43  | 4-59  | 3-9  | 2  | 4  | HPGTYDILTGYFDY        | 15     |      |    |             |            |      |       |          |
| neM6-H10  | 4-39  | 3-10 | 3  | 4  | RRVVRGVMIFDY          | 12     |      |    |             |            |      |       |          |
| neM6-H14  | 3-15  | 3-10 | 2  | 4  | DDYYGSGSPYY           | 11     |      |    |             |            |      |       |          |
| neM6-H35  | 3-7   | 4-23 | 2  | 5  | DNRDHDYGGNSPWFDP      | 16     |      |    |             |            |      |       |          |
| neM6-H45  | 3-23  | 3-10 | 2  | 5  | DKEMYYYGSGSYWFDP      | 17     |      |    |             |            |      |       |          |
| neM6-H46  | 3-30  | 3-10 | 1  | 4  | EDDPLWFGDY            | 10     |      |    |             |            |      |       |          |
| neM6-H48  | 4-39  | 1-26 | 1  | 4  | QFAGWELRKQYKNFDY      | 16     |      |    |             |            |      |       |          |
| neM6-H9   | 3-48  | 3-10 | 2  | 4  | LISGSYYFDY            | 11     |      |    |             |            |      |       |          |
| neM6-H42  | 4-61  | 6-13 | 2  | 4  | GAGYSSWYFDY           | 13     |      |    |             |            |      |       |          |
| neM6-H40  | 3-23  | /    | /  | 4  | SFSGGDYDY             | 9      |      |    |             |            |      |       |          |

RF, reading frame: # antibody failed to be expressed

- non reactive; +, reactive

c, diffuse cytoplasmic staining; N, nuclear staining, F, cytoplasmic fibers; V, vesicles

**Table S8:** Repertoire and reactivity of antibodies from new emigrant B cells of Mouse #7

| Ig        | HEAVY |      |    |    |                    |        | LIGHT |    |                |        |      | REACTIVITY |          |  |
|-----------|-------|------|----|----|--------------------|--------|-------|----|----------------|--------|------|------------|----------|--|
|           | VH    | D    | RF | JH | CDR3(aa)           | Length | Vκ    | Jκ | CDR3(aa)       | Length | Poly | HEp-2      | Staining |  |
| neM7-k1   | 1-18  | 7-27 | 2  | 3  | GWAGNWGLGSDAFDI    | 15     | 1-5   | 1  | QQYNSYWT       | 8      |      |            |          |  |
| neM7-k2   | 3-21  | 3-9  | 2  | 4  | CDILTGYLLFDY       | 12     | 3-11  | 4  | QQRSNWPLT      | 9      | -    | +          | -        |  |
| neM7-k3   | 3-30  | 6-13 | 3  | 4  | SIAAAVHYFDY        | 11     | 3-15  | 2  | QQYNNRPPYP     | 10     | -    | +          | -        |  |
| neM7-k4   | 3-48  | 7-27 | 2  | 4  | GRGGNWGSTQPGYYFDY  | 17     | 1-8   | 2  | QQYYSFPYT      | 9      | -    | -          | -        |  |
| neM7-k5   | 1-2   | /    | /  | 3  | GPIVAVADAFDI       | 12     | 3-20  | 2  | QQYGSSPYT      | 9      | -    | -          | -        |  |
| neM7-k7   | 3-15  | 3-10 | 1  | 4  | VNPSFGDQDFDY       | 12     | 1-8   | 3  | QQYYSYPFT      | 9      | -    | -          | -        |  |
| neM7-k9   | 3-33  | 5-5  | 1  | 4  | GRGWQLWTDLYYFDY    | 16     | 1-5   | 2  | QQYNSYSPYT     | 10     | +    | +          | -        |  |
| neM7-k11  | 3-7   | 3-10 | 1  | 1  | DYRGGFGELLYFQH     | 14     | 3-11  | 2  | QQRSNWPPYT     | 10     | -    | -          | -        |  |
| neM7-k18  | 3-33  | 6-13 | 3  | 4  | VKGIAAAGSFDY       | 12     | 1-8   | 2  | QQYYSYPYT      | 9      | -    | +          | C        |  |
| neM7-k22  | 4-38  | 3-10 | 2  | 1  | PQKRYYYGSGSYDEYFQH | 18     | 3-11  | 4  | QQRNSLTL       | 8      | -    | +          | -        |  |
| neM7-k25  | 3-11  | 1-26 | 2  | 4  | GGRSGSYFDY         | 10     | 3-20  | 1  | QQYGSSPPGT     | 10     | -    | -          | -        |  |
| neM7-k26  | 4-38  | 6-19 | 3  | 4  | HAAVAGTPYYFDY      | 13     | 3-15  | 1  | QQYNNWPPTCT    | 11     | -    | -          | -        |  |
| neM7-k28  | 1-3   | 3-10 | 2  | 4  | GGSGSYNLFYD        | 12     | 3-15  | 4  | QQYNNWPPLT     | 10     | -    | -          | -        |  |
| neM7-k31  | 4-59  | 3-10 | 3  | 3  | VAMVRGVISAFDI      | 13     | 3-20  | 2  | QQYGSSPPY      | 9      | -    | -          | -        |  |
| neM7-k33# | 3-49  | 3-22 | 2  | 6  | DRYYDSSGYYYYYYMDV  | 19     | 1-8   | 2  | QQYYSFPRT      | 9      |      |            |          |  |
| neM7-k34  | 4-38  | /    | /  | 4  | RGKYYFDY           | 8      | 3-15  | 2  | QQYNNWPPYT     | 10     | -    | +          | -        |  |
| neM7-k37  | 4-38  | 4-17 | 2  | 4  | NYGDYVGFYD         | 10     | 1-12  | 4  | QQANSFPPLT     | 10     | -    | -          | -        |  |
| neM7-k38# | 4-39  | 5-12 | 2  | 4  | HIGGAGYSGPFYD      | 13     | 3-20  | 4  | QQYGSFLT       | 8      |      |            |          |  |
| neM7-k42  | 4-61  | 3-10 | 2  | 4  | DSDYYGSGSYFDY      | 13     | 3-11  | 5  | QQRSNWPLT      | 9      | -    | -          | -        |  |
|           | VH    | D    | RF | JH | CDR3(aa)           | Length | Vλ    | Jλ | CDR3(aa)       | Length | Poly | HEp-2      | Staining |  |
| neM7-λ10  | 1-46  | 2-2  | 2  | 5  | RYCSSTSCWFDP       | 12     | 6-57  | 2  | QSYDSSNQV      | 9      | -    | -          | -        |  |
| neM7-λ14  | 3-30  | 3-10 | 2  | 3  | GGRKYYGSGSYDLDAFDI | 19     | 2-14  | 3  | SSYTSSSTWV     | 10     | -    | -          | -        |  |
| neM7-λ19  | 4-34  | /    | /  | 4  | LGLKGLGPYFDY       | 12     | 2-23  | 3  | CSYAGSSTKV     | 10     | -    | -          | -        |  |
| neM7-λ20  | 4-38  | 2-2  | 2  | 5  | RYCSSTSCYVNWFDP    | 15     | 1-40  | 3  | QSYDSSLGSGV    | 11     | -    | -          | -        |  |
| neM7-λ21  | 3-30  | 6-19 | 2  | 4  | SYSSGWFDY          | 9      | 2-14  | 3  | SSYTSSSTYWV    | 11     | -    | -          | -        |  |
| neM7-λ24  | 4-59  | 1-26 | 1  | 3  | RSEWEPEGVDAFDI     | 14     | 3-21  | 2  | QVWDSSDHVV     | 10     | -    | -          | -        |  |
| neM7-λ29# | 4-34  | 3-10 | 2  | 4  | NPYYYGSGRPPFDY     | 14     | 1-47  | 1  | SLSGPDGTGKVTVL | 28     |      |            |          |  |
| neM7-λ32  | 3-7   | 3-10 | 2  | 4  | VGYGSGSYFDY        | 11     | 3-10  | 3  | YSTDSSGNQGV    | 11     | -    | -          | -        |  |
| neM7-λ38  | 4-39  | 5-12 | 2  | 4  | HIGGAGYSGPFYD      | 13     | 1-47  | 2  | AAWDDSLSGVV    | 11     | -    | -          | -        |  |
| neM7-λ41# | 5-51  | 6-13 | 2  | 4  | HRDHSSSWDTLGYFDY   | 16     | 2-23  | 3  | CSYAGSSTWV     | 10     |      |            |          |  |

RF, reading frame: # antibody failed to be expressed

- non reactive; +, reactive

c, diffuse cytoplasmic staining; N, nuclear staining; F, cytoplasmic fibers; V, vesicles

**Table S9:** Repertoire and reactivity of antibodies from new emigrant B cells of Mouse #8

| Ig        | HEAVY  |      |    |    |                        |        | LIGHT |    |              |        |      | REACTIVITY |          |  |
|-----------|--------|------|----|----|------------------------|--------|-------|----|--------------|--------|------|------------|----------|--|
|           | VH     | D    | RF | JH | CDR3(aa)               | Length | Vκ    | Jκ | CDR3(aa)     | Length | Poly | HEp-2      | Staining |  |
| neM8-K01  | 4-34   | 3-10 | 1  | 4  | GQLHVLLWFGELLSSHIFDY   | 20     | 2-28  | 4  | MQALQTPLT    | 9      | +    | +          | -        |  |
| neM8-K02  | 3-23   | 3-22 | 2  | 4  | RSDYDSSGYPISVDY        | 15     | 1-16  | 3  | QQYNSYPFT    | 9      | -    | -          | -        |  |
| neM8-K10  | 4-4    | 3-10 | 2  | 6  | VGDPKDYYYGSGGNYYYYGMDV | 23     | 3-20  | 3  | QQYGSSPPVFT  | 11     | -    | -          | -        |  |
| neM8-K13# | 5-51   | 5-12 | 3  | 6  | HVVATTNLASYYYYGMDV     | 18     | 3-15  | 2  | QQYNNWPLYT   | 10     |      |            |          |  |
| neM8-K15# | 4-59   | 2-8  | 2  | 2  | STGYWYFDL              | 10     | 3-11  | 3  | QQRSNWPFT    | 9      |      |            |          |  |
| neM8-K18# | 3-30   | 4-23 | 3  | 6  | VFSRSVTTYYYYYGMDV      | 17     | 2-28  | 1  | MQALQTPT     | 9      |      |            |          |  |
| neM8-K20  | 3-30-3 | 3-10 | 2  | 5  | YYGSGSLSD              | 9      | 3-20  | 3  | QQYGSSPFT    | 9      | -    | -          | -        |  |
| neM8-K25  | 3-11   | 5-5  | 3  | 4  | ETTRGDTAMVTPCNY        | 15     | 1-12  | 3  | QQANSFPFT    | 9      | +    | +          | -        |  |
| neM8-K26# | 1-46   | 3-9  | 2  | 3  | DLCRGGGYDILTHDAFDI     | 18     | 3-20  | 2  | QQYGSSPLYT   | 10     |      |            |          |  |
| neM8-K27# | 4-34   | 2-2  | 2  | 6  | DRYCSSTSCSYYYYYGMDV    | 19     | 3-20  | 5  | QQYGSSPPIT   | 10     |      |            |          |  |
| neM8-K29  | 4-34   | 4-4  | 2  | 4  | VAKEDDYSKLVYYFDY       | 17     | 1-8   | 1  | QQYYSFPWT    | 9      | -    | +          | -        |  |
| neM8-K35  | 3-30-3 | /    | /  | 6  | VSTAGMDV               | 8      | 3-20  | 3  | QQYGSSPHT    | 9      | -    | -          | -        |  |
| neM8-K41  | 4-34   | /    | /  | 4  | ADFIDY                 | 6      | 3-11  | 3  | QQRSTWVT     | 8      | -    | -          | -        |  |
| neM8-K42# | 5-51   | 6-13 | 3  | 2  | HRIAAAGTWYFDL          | 13     | 1-5   | 1  | QQYNSYSQT    | 9      |      |            |          |  |
| neM8-K43  | 3-64   | /    | /  | 6  | RMTGMDV                | 7      | 1-17  | 3  | LQHNSYPFT    | 9      | -    | +          | -        |  |
| neM8-K44  | 3-48   | 4-17 | 2  | 5  | DPPPYGDYDGWDFP         | 14     | 1-8   | 4  | QQYYSYPPL    | 9      | -    | -          | -        |  |
| neM8-K45  | 4-34   | 6-13 | 2  | 4  | GLSSSPYFDY             | 11     | 3-20  | 4  | QQYGSSLT     | 8      | -    | -          | -        |  |
| neM8-K47  | 3-23   | /    | /  | 4  | DFLYYFDY               | 8      | 3-15  | 2  | QQYNNWPPYT   | 10     | -    | -          | -        |  |
| neM8-K48# | 3-30   | 2-15 | 2  | 4  | IGYCSGGSCYSQGDYFDY     | 18     | 2-30  | 5  | MQGTHWPIT    | 9      |      |            |          |  |
|           | VH     | D    | RF | JH | CDR3(aa)               | Length | Vλ    | Jλ | CDR3(aa)     | Length | Poly | HEp-2      | Staining |  |
| neM8-L07  | 1-3    | /    | /  | 4  | EEGY                   | 4      | 3-25  | 1  | QSADSSGTYV   | 0      | -    | +          | -        |  |
| neM8-L19# | 5-51   | 5-5  | 2  | 4  | PRRGTAMAFGYSYGPYYFDY   | 20     | 2-14  | 3  | SSYTSSSTQV   | 0      |      |            |          |  |
| neM8-L21  | 4-34   | 4-17 | 2  | 4  | SPYGDSLPIDY            | 11     | 2-8   | 2  | SSYAGSNNLV   | 0      | -    | -          | -        |  |
| neM8-L23# | 1-69   | 2-15 | 2  | 6  | DGYCSGGSCYAPYYYYGMDV   | 20     | 7-43  | 2  | LLYYGGAVV    | 0      |      |            |          |  |
| neM8-L30  | 3-7    | 3-22 | 3  | 4  | DQSVTMIVVIWPEYYFDY     | 19     | 1-40  | 3  | QSYDSSLGSGSV | 11     | +    | +          | -        |  |
| neM8-L38  | 3-11   | 1-7  | 2  | 6  | ASGWNYYYYYGMDV         | 13     | 1-47  | 3  | AWDDSLSGPV   | 0      | +    | +          | -        |  |
| neM8-L42  | 5-51   | 6-13 | 3  | 2  | HRIAAAGTWYFDL          | 13     | 2-14  | 2  | SSYTSSSTLV   | 10     | -    | +          | -        |  |
| neM8-L09  |        |      |    |    |                        |        | 2-14  | 1  | SSYTSSSTYV   | 10     |      |            |          |  |

RF, reading frame: # antibody failed to be expressed

- non reactive; +, reactive

c, diffuse cytoplasmic staining; N, nuclear staining, F, cytoplasmic fibers; V, vesicles



**Table S10:** Repertoire and reactivity of antibodies from new emigrant B cells of Mouse #9

| Ig        | HEAVY  |      |    |    |                    |        | LIGHT |    |              |        | REACTIVITY |       |          |
|-----------|--------|------|----|----|--------------------|--------|-------|----|--------------|--------|------------|-------|----------|
|           | VH     | D    | RF | JH | CDR3(aa)           | Length | Vκ    | Jκ | CDR3(aa)     | Length | Poly       | HEp-2 | Staining |
| neM9-K01  | 4-61   | 2-21 | 2  | 4  | VGCGGDCPLDY        | 11     | 3-15  | 4  | QQYNNWPPLT   | 10     | -          | +     | -        |
| neM9-K07# | 3-48   | 3-10 | 2  | 6  | LKAVRGVYYYYMDV     | 14     | 1-39  | 1  | QSYSTPPWT    | 10     |            |       |          |
| neM9-K08  | 3-23   | 2-2  | 2  | 3  | DQGGYCSSTSCPDAFDI  | 17     | 1-16  | 2  | QQYNSYPYT    | 9      | -          | -     | -        |
| neM9-K13  | 3-30-3 | 6-6  | 3  | 4  | DGADTGSIASSSGYFDY  | 17     | 3-20  | 4  | QQYGSSPLT    | 9      | -          | -     | -        |
| neM9-K15  | 3-30   | /    | /  | 2  | ATGDRGNWYFDL       | 12     | 3-20  | 4  | QQYGSSPPLT   | 10     | +          | +     | -        |
| neM9-K17  | 3-33   | 3-10 | 2  | 4  | GVSEYSGSYYFDY      | 14     | 3-20  | 4  | QQYGSSSPLT   | 10     | +          | +     | -        |
| neM9-K22  | 3-49   | 2-8  | 2  | 4  | DPTLLYCTNGVCHSFDY  | 17     | 3-20  | 1  | QQYGSSPRT    | 9      | +          | +     | -        |
| neM9-K26  | 3-48   | 6-19 | 1  | 4  | ESTTQWLDDY         | 11     | 1-16  | 4  | QQNSYPLT     | 8      | -          | +     | -        |
| neM9-K30  | 1-69   | 7-27 | 3  | 3  | GGTGAQGFAFDI       | 12     | 1-17  | 4  | LQHNSYPLT    | 9      | +          | +     | -        |
| neM9-K31  | 4-34   | /    | /  | 4  | GDRHYFDY           | 8      | 1-39  | 1  | QSYSTPPWT    | 10     | -          | -     | -        |
| neM9-K32  | 3-11   | 7-27 | 1  | 4  | QLGKGLDFD          | 10     | 1-17  | 1  | LQHNSYPWT    | 9      | -          | -     | -        |
| neM9-K34  | 4-59   | 6-13 | 3  | 4  | GGIAAAGSLGHGY      | 13     | 3-20  | 1  | QQYGSSPWT    | 9      | -          | +     | -        |
| neM9-K35  | 3-30-3 | 3-22 | 2  | 4  | EASLPYDSSGRVGEATDY | 18     | 3-20  | 1  | QQYGSSPTWT   | 10     | -          | -     | -        |
| neM9-K39  | 3-30-3 | /    | /  | 3  | DCVSGAFDI          | 9      | 3-15  | 4  | QQYNNWPPLT   | 10     | -          | -     | -        |
| neM9-K42  | 4-34   | 6-6  | 2  | 4  | GNPTPTYSSSYFDY     | 15     | 2-28  | 2  | MQALQTPQT    | 9      | -          | -     | -        |
| neM9-K43  | 3-21   | 1-26 | 2  | 4  | NSGSYHLFDY         | 10     | 2-30  | 4  | MQGTHWPPLT   | 10     | -          | -     | -        |
| neM9-K44# | 3-23   | 7-27 | 2  | 4  | DRDWGFIDY          | 9      | 3-20  | 1  | QQYGSSPTWT   | 10     |            |       |          |
|           | VH     | D    | RF | JH | CDR3(aa)           | Length | Vλ    | Jλ | CDR3(aa)     | Length | Poly       | HEp-2 | Staining |
| neM9-L06  | 4-34   | /    | /  | 4  | PLGFDY             | 6      | 1-51  | 3  | GTWDSLSAV    | 10     | -          | +     | -        |
| neM9-L11  | 3-33   | 6-13 | 3  | 4  | PLAAAGLY           | 8      | 1-51  | 2  | GTWDSLSV     | 10     | +          | +     | N        |
| neM9-L12# | 3-11   | 1-26 | 2  | 3  | DHGYSGSYAFDI       | 13     | 1-44  | 2  | AAWDDSLNGVV  | 11     |            |       |          |
| neM9-L24  | 3-15   | 7-27 | 3  | 4  | DPPLSRTGGSDY       | 12     | 2-14  | 2  | SSYTSSSTLNVV | 12     | -          | -     | -        |
| neM9-L29  | 3-33   | 6-13 | 3  | 4  | PLAAAGLY           | 8      | 3-1   | 2  | QAWDSSTAHHV  | 11     | -          | +     | -        |
| neM9-L45  | 3-30   | 7-27 | 1  | 4  | VALSPAELGMRPFYD    | 16     | 2-14  | 2  | SSYTSSSTLVV  | 11     |            |       |          |
| neM9-L48  | 4-38-2 | 2-8  | 3  | 4  | SCLSQMVFYFDY       | 12     | 1-47  | 3  | AAWDDSLSGRV  | 9      |            |       |          |
|           | VH     | D    | RF | JH | CDR3(aa)           | Length |       |    |              |        |            |       |          |
| neM9-H38  | 1-18   | /    | /  | 2  | DQDPRPSYFDL        | 11     |       |    |              |        |            |       |          |

**Table S11:** Repertoire and reactivity of antibodies from new emigrant B cells of Mouse #10

| Ig         | HEAVY  |      |    |    |                     |        | LIGHT |    |             |        | REACTIVITY |       |          |
|------------|--------|------|----|----|---------------------|--------|-------|----|-------------|--------|------------|-------|----------|
|            | VH     | D    | RF | JH | CDR3(aa)            | Length | Vk    | Jk | CDR3        | Length | Poly       | HEp-2 | Staining |
| neM10-K03# | 4-34   | 7-27 | 1  | 2  | ASLGNDRNWYFDL       | 13     | 1-37  | 4  | QRTYNAP     | 7      |            |       |          |
| neM10-K04# | 5-51   | 6-13 | 3  | 6  | LPGIAAAGASYYYYYMDV  | 19     | 3-20  | 4  | QQYGSSPLT   | 9      |            |       |          |
| neM10-K07  | 3-15   | /    | /  | 3  | DRWGAFDI            | 8      | 1-8   | 4  | QQYYSYPLT   | 9      | -          | -     | -        |
| neM10-K11  | 3-9    | 6-13 | 2  | 4  | GYSSSWYFDY          | 10     | 1-8   | 4  | QQYYSYHGT   | 9      | -          | -     | -        |
| neM10-K14  | 3-21   | 7-27 | 2  | 3  | HWGSGAFDI           | 9      | 3-11  | 3  | QQRSNWPPFT  | 10     | -          | -     | -        |
| neM10-H17  | 3-15   | 6-19 | 2  | 4  | DFPYSTYYFDY         | 11     | 1-8   | 2  | QQYYSYPYS   | 9      | +          | +     | -        |
| neM10-K19  | 1-2    | 7-27 | 3  | 4  | DTGTGAGDRFDY        | 12     | 3-20  | 4  | QQYGSSRLT   | 9      | -          | -     | -        |
| neM10-K20  | 4-34   | 7-27 | 1  | 2  | GGVQLGMVKGWYFDL     | 15     | 1-8   | 4  | QQYYSYPLT   | 9      | +          | +     | -        |
| neM10-K21  | 1-2    | 1-7  | 2  | 4  | ASYNWNYYFDY         | 11     | 3-11  | 1  | QQRSTWPPWT  | 10     | +          | +     | -        |
| neM10-K23  | 4-39   | 6-6  | 2  | 5  | RSSSYWFDP           | 9      | 1-39  | 3  | QQSYSTPFT   | 9      | -          | +     | -        |
| neM10-K24  | 3-7    | 2-2  | 2  | 1  | GKDCSSTSCYLSEYFQH   | 17     | 1-12  | 1  | QQANSFPQT   | 9      | -          | -     | -        |
| neM10-K25  | 3-33   | /    | /  | 4  | DSNGGSYYFDY         | 11     | 1-27  | 2  | QKYNAPRD    | 9      | +          | -     | -        |
| neM10-K26  | 3-33   | 6-13 | 1  | 3  | GSSMSDPQLVSTDAFDI   | 17     | 2-30  | 4  | MQGTHWPLT   | 9      | +          | -     | -        |
| neM10-K31  | 4-31   | 5-5  | 3  | 4  | EWRNTAMVDY          | 10     | 1-39  | 2  | QQSYSTPPYT  | 10     | -          | -     | -        |
| neM10-K32  | 3-53   | 1-26 | 2  | 4  | ASRASSGSYYFDY       | 13     | 3-20  | 4  | QQYGSSPPLT  | 10     | -          | +     | -        |
| neM10-K35  | 3-23   | 6-13 | 3  | 4  | DQSFKAAAGPIDY       | 13     | 1D-8  | 1  | QQYYSFPRT   | 9      | -          | +     | -        |
| neM10-K37  | 3-23   | 6-13 | 2  | 4  | DRLGGYSSSWYFDY      | 14     | 1D-12 | 2  | QQANSFPPYT  | 10     | -          | -     | -        |
| neM10-K39# | 1-18   | 7-27 | 3  | 4  | ITGDHHYFDY          | 10     | 1D-8  | 4  | QQYYSFPLT   | 9      |            |       |          |
| neM10-K42  | 4-34   | 3-10 | 2  | 4  | SRYYGSGSYYYYFDY     | 15     | 1-8   | 2  | QQYYSYPYT   | 9      | +          | +     | -        |
| neM10-K43  | 3-23   | /    | /  | 4  | RPGAGDY             | 7      | 1-39  | 4  | QQSYSTPLT   | 9      | +          | +     | -        |
| neM10-K45  | 3-30-3 | 7-27 | 1  | 4  | DRGQLGIFDY          | 10     | 3-15  | 2  | QQYNNWPYS   | 9      | -          | -     | -        |
| neM10-K47  | 5-51   | 2-21 | 2  | 4  | LVDFSGVGSYCGGDCYFDY | 20     | 3-15  | 4  | QQYNNWPPLT  | 10     | -          | -     | -        |
|            | VH     | D    | RF | JH | CDR3(aa)            | Length | Vλ    | Jλ | CDR3        | Length | Poly       | HEp-2 | Staining |
| neM10-L01# | 1-2    | /    | /  | 6  | DLVGRQTEYYYYGMDV    | 17     | 1-47  | 2  | AAWDDSLSGVV | 11     |            |       |          |
| neM10-L09  | 4-61   | 2-15 | 2  | 3  | RYCSGGSCYSAFDI      | 14     | 3-1   | 2  | QAWDSSTAHVV | 11     | -          | -     | -        |
| neM10-L12  | 4-59   | 3-10 | 2  | 4  | TAYGSGSYYIDY        | 12     | 3-25  | 1  | QSADSSGTIV  | 10     | +          | +     | -        |
| neM10-L16  | 3-11   | 2-8  | 2  | 4  | EATNGVCFDY          | 10     | 1-44  | 2  | AAWDDSLNGPV | 11     | -          | -     | -        |
| neM10-L18# | 4-59   | 6-13 | 2  | 4  | DRSWGSNYFDY         | 11     | 1-47  | 2  | AAWDDSLSGPV | 11     |            |       |          |
| neM10-L29  | 3-30-3 | 3-10 | 3  | 3  | VMVRGVNAFDI         | 11     | 1-40  | 2  | QSYDSSLSGVV | 11     | -          | +     | -        |
| neM10-L30  | 3-23   | 4-17 | 2  | 4  | ERTSYGDYFDY         | 11     | 2-11  | 3  | CSYAGSYTWV  | 10     | -          | +     | -        |
| neM10-L34  | 3-7    | 1-26 | 2  | 4  | DSGSYYFDY           | 10     | 2-23  | 1  | CSYAGSSTIV  | 10     | +          | +     | -        |
| neM10-L38  | 3-11   | 3-22 | 2  | 3  | WDYYDSSGYAFDI       | 14     | 2-18  | 2  | SSYTSSSTLV  | 10     | -          | -     | -        |
|            | VH     | D    | RF | JH | CDR3(aa)            | Length |       |    |             |        |            |       |          |
| neM10-H02  | 3-23   | 1-7  | 3  | 3  | IITGENAFDI          | 10     |       |    |             |        |            |       |          |
| neM10-H06  | 4-34   | 6-6  | 1  | 4  | EGQLVGDYFDY         | 11     |       |    |             |        |            |       |          |
| neM10-H17  | 3-15   | 6-19 | 2  | 4  | DFPYSTYYFDY         | 11     |       |    |             |        |            |       |          |
| neM10-H27  | 3-48   | 3-10 | 2  | 4  | TYYYGSGSRYFDY       | 14     |       |    |             |        |            |       |          |
| neM10-H36  | 4-38-2 | 6-13 | 1  | 2  | GGEQQLVSWYFDL       | 13     |       |    |             |        |            |       |          |
| neM10-H40  | 1-2    | 6-13 | 2  | 4  | GGSSSWYFDY          | 11     |       |    |             |        |            |       |          |
| neM10-H41  | 1-2    | /    | /  | 4  | ERWGDY              | 6      |       |    |             |        |            |       |          |

RF, reading frame: # antibody failed to be expressed

- non reactive; +, reactive

c, diffuse cytoplasmic staining; N, nuclear staining, F, cytoplasmic fibers; V, vesicles

**Table S12:** Repertoire and reactivity of antibodies from GFP-negative new emigrant B cells of Mouse #11

| Ig             | HEAVY  |      |    |    |                   |        | LIGHT |    |              |        |      | REACTIVITY |          |  |
|----------------|--------|------|----|----|-------------------|--------|-------|----|--------------|--------|------|------------|----------|--|
|                | VH     | D    | RF | JH | CDR3(aa)          | Length | Vκ    | Jκ | CDR3(aa)     | Length | Poly | HEp-2      | Staining |  |
| neGFP-M11-K53  | 4-4    | 6-19 | 2  | 4  | VLSSGHFDY         | 9      | 1-8   | 4  | QQYYSYPLT    | 9      | -    | -          | -        |  |
| neGFP-M11-K58# | 4-59   | 1-26 | 2  | 3  | EEEGGSYAFDI       | 11     | 1-33  | 3  | QQYDNLPL     | 7      |      |            |          |  |
| neGFP-M11-K61  | 4-34   | 2-2  | 2  | 4  | RYCSSTSCYYFDY     | 13     | 3-15  | 3  | QQYNNWPFT    | 9      | -    | -          | -        |  |
| neGFP-M11-K63  | 4-39   | 3-22 | 2  | 5  | RDLNYYDSSGYYSWFDP | 17     | 1-39  | 1  | QQSYSTPPWT   | 10     | -    | -          | -        |  |
| neGFP-M11-K67# | 3-30-3 | 6-13 | 3  | 1  | DPQRIAAAGPFQH     | 13     | 1-5   | 1  | QQYNSYSRT    | 9      |      |            |          |  |
| neGFP-M11-K68  | 3-48   | /    | /  | 2  | DSQLGRGYFDL       | 11     | 3-15  | 1  | QQYNNWPPWT   | 10     | -    | -          | -        |  |
| neGFP-M11-K73  | 4-4    | 4-11 | 2  | 4  | GSSNRNTNDY        | 10     | 3-20  | 2  | QQYGSSYS     | 8      | -    | -          | -        |  |
| neGFP-M11-K78  | 4-34   | /    | /  | 4  | GVAANRLRSPGLDY    | 14     | 3-20  | 4  | QQYGSSPPT    | 9      | -    | +          | -        |  |
| neGFP-M11-K80  | 4-34   | 6-19 | 2  | 4  | PYSSGWYFDY        | 10     | 3-11  | 1  | QQRSNWLYT    | 9      | -    | -          | -        |  |
| neGFP-M11-K64  |        |      |    |    |                   |        | 1-17  | 2  | LQHNSYPQYS   | 10     |      |            |          |  |
| neGFP-M11-K75  |        |      |    |    |                   |        | 3-20  | 2  | QQYGSSPPYS   | 10     |      |            |          |  |
|                | VH     | D    | RF | JH | CDR3(aa)          | Length | Vλ    | Jλ | CDR3(aa)     | Length | Poly | HEp-2      | Staining |  |
| neGFP-M11-L59  | 4-34   | 1-26 | 2  | 4  | HLPVRYSGSYSPSSDY  | 15     | 1-36  | 1  | AAWDDSLSGSYV | 12     | -    | -          | -        |  |
| neGFP-M11-L62  | 4-61   | 7-27 | 2  | 4  | IRPTTNWGFTKYYFDY  | 16     | 2-14  | 2  | SSYTSSTLV    | 10     | +    | +          | -        |  |
| neGFP-M11-L66  | 3-11   | /    | /  | 4  | GVAGLGY           | 7      | 2-14  | 1  | SSYTSSTYV    | 10     | -    | +          | -        |  |
| neGFP-M11-L70  | 3-7    | /    | /  | 3  | AAFDI             | 5      | 1-51  | 1  | GTWDDSLSAYV  | 11     | -    | +          | -        |  |
| neGFP-M11-L76  | 4-34   | 4-17 | 2  | 3  | VPHYGDYHDAFDI     | 13     | 1-47  | 3  | AAWDDSLSGRV  | 11     | -    | -          | -        |  |
| neGFP-M11-L77  | 3-11   | 3-10 | 3  | 3  | VKANRGAEDAFDI     | 13     | 2-14  | 3  | SSYTSSTWV    | 10     | -    | -          | -        |  |
| neGFP-M11-L81  | 4-59   | 3-22 | 2  | 3  | SHASSGYAFDI       | 12     | 2-23  | 1  | CSYAGSSTYV   | 10     | -    | -          | -        |  |
| neGFP-M11-L91  | 4-39   | 3-10 | 2  | 4  | LIRVFDYYGSGSAFDY  | 16     | 1-44  | 2  | AAWDDSLNGHV  | 12     | -    | -          | -        |  |
| neGFP-M11-L94  | 3-30-3 | /    | /  | 4  | DPPLFDY           | 7      | 2-14  | 3  | SSYTSSTLV    | 10     | -    | -          | -        |  |

RF, reading frame: # antibody failed to be expressed

- non reactive; +, reactive

c, diffuse cytoplasmic staining; N, nuclear staining; F, cytoplasmic fibers; V, vesicles

**Table S13:** Repertoire and reactivity of antibodies from GFP-positive new emigrant B cells expressing 620W PTPN22 from Mouse #11

| Ig            | HEAVY |      |    |    |                     |        | LIGHT |    |              |        | REACTIVITY |       |          |
|---------------|-------|------|----|----|---------------------|--------|-------|----|--------------|--------|------------|-------|----------|
|               | VH    | D    | RF | JH | CDR3(aa)            | Length | Vκ    | Jκ | CDR3(aa)     | Length | Poly       | HEp-2 | Staining |
| neGFP+M11-K7  | 3-23D | 6-13 | 3  | 4  | DRGIAAAGTFDY        | 12     | 1-39  | 2  | QQSYSTRYS    | 9      | -          | -     | -        |
| neGFP+M11-K8  | 3-7   | 3-3  | 3  | 6  | GRFTADYYYYMDV       | 13     | 3-15  | 3  | QQYNNWPT     | 8      | -          | -     | -        |
| neGFP+M11-K10 | 4-39  | 3-3  | 1  | 4  | AEGDLLEWLSIGCFDY    | 16     | 1-27  | 4  | QKYNSTALLT   | 9      | -          | +     | -        |
| neGFP+M11-K19 | 3-74  | 7-27 | /  | 3  | AEYFLGDWHHDAFDI     | 15     | 1-12  | 3  | QQANSFPFT    | 9      | -          | -     | -        |
| neGFP+M11-K24 | 3-23D | 6-13 | 3  | 4  | DRGIAAAGTFDY        | 12     | 1-39  | 1  | QQSYSTPWT    | 9      | -          | -     | -        |
| neGFP+M11-K25 | 4-61  | 2-21 | 3  | 4  | ATVVVTAQYYFDY       | 13     | 1-39  | 2  | QQSYSTPYT    | 9      | +          | +     | -        |
| neGFP+M11-K29 | 3-23D | 6-19 | 2  | 3  | RGWGHAFDI           | 9      | 1-33  | 2  | QQYDNLPPRGTA | 12     | +          | -     | -        |
| neGFP+M11-K38 | 1-2   | 6-13 | 2  | 4  | HSWYYFDY            | 8      | 3-11  | 1  | QQRSNWWT     | 8      | +          | +     | -        |
| neGFP+M11-K47 | 3-30  | 2-21 | 2  | 3  | KSPPYCGGDCYSRDDAFDI | 19     | 3-20  | 5  | QQYGSSVT     | 8      | -          | -     | -        |
|               | VH    | D    | RF | JH | CDR3(aa)            | Length | Vλ    | Jλ | CDR3(aa)     | Length | Poly       | HEp-2 | Staining |
| neGFP+M11-L2  | 3-21  | 2-15 | 1  | 4  | DERGIGWYFDY         | 11     | 2-23  | 1  | CSYAGSSTYV   | 10     | -          | +     | -        |
| neGFP+M11-L4  | 1-2   | 6-6  | 3  | 3  | VRGIAARRPDAFDI      | 14     | 3-21  | 3  | QVWDSSSDHPV  | 11     | -          | -     | N        |
| neGFP+M11-L6  | 3-11  | 4-17 | 2  | 4  | RDYGDYGRGGPRWYFDY   | 17     | 3-21  | 1  | QVWDSSSDHYV  | 11     | -          | -     | -        |
| neGFP+M11-L12 | 3-33  | 4-11 | 2  | 4  | NDYSNYGAFDY         | 11     | 1-40  | 3  | QSYDSSLSGWV  | 11     | -          | -     | -        |
| neGFP+M11-L13 | 3-21  | 3-22 | 3  | 3  | GRVTMIVVDAFDI       | 13     | 1-51  | 2  | GTWDSSLSAVV  | 11     | -          | +     | -        |
| neGFP+M11-L14 | 1-69  | 6-6  | 3  | 5  | EGASIAARPYNWFDP     | 15     | 1-47  | 3  | AAWDDSLSGWV  | 11     | +          | +     | -        |
| neGFP+M11-L18 | 3-73  | 3-22 | 2  | 4  | SPGYDSSGYGY         | 13     | 2-11  | 3  | CSYAGSYTWV   | 10     | +          | +     | N        |
| neGFP+M11-L32 | 3-30  | 6-6  | 1  | 6  | GEQLSDFDYGGMDV      | 16     | 3-1   | 1  | QAWDSSTAYV   | 10     | -          | -     | -        |
| neGFP+M11-L44 | 4-30  | 3-3  | 3  | 4  | ERITIFGVAGSFDY      | 14     | 2-23  | 2  | CSYAGSSTLV   | 10     | +          | +     | -        |
| neGFP+M11-L48 | 3-33  | 7-27 | 3  | 4  | EGTITGPGYFDY        | 14     | 3-25  | 3  | QSADSSGTYWV  | 11     | -          | -     | -        |

RF, reading frame: # antibody failed to be expressed

- non reactive; +, reactive

c, diffuse cytoplasmic staining; N, nuclear staining, F, cytoplasmic fibers; V, vesicles

**Table S14:** Repertoire and reactivity of antibodies from GFP-negative new emigrant B cells of Mouse #12

| Ig             | HEAVY |      |    |    |                   | LIGHT  |      |    |              | REACTIVITY |      |       |          |
|----------------|-------|------|----|----|-------------------|--------|------|----|--------------|------------|------|-------|----------|
|                | VH    | D    | RF | JH | CDR3(aa)          | Length | Vk   | Jk | CDR3(aa)     | Length     | Poly | HEp-2 | Staining |
| neGFP-M12-k02  | 3-53  | 4-11 | 3  | 5  | GWSTVTNWDFP       | 11     | 1-39 | 3  | QSYSTPFT     | 9          | +    | +     | -        |
| neGFP-M12-k07  | 3-33  | 6-13 | 1  | 4  | PALHEQQLDYDFY     | 14     | 3-15 | 1  | QYNNWPRWT    | 10         | -    | -     | -        |
| neGFP-M12-k16  | 1-3   | 6-13 | 3  | 5  | DCGIAAAGNWDFP     | 13     | 1-8  | 3  | QYYSYPFT     | 9          | -    | +     | -        |
| neGFP-M12-k19# | 1-69  | 7-27 | 3  | 4  | VVETGVENY         | 9      | 3-11 | 1  | QRRNWPPWT    | 10         |      |       |          |
| neGFP-M12-k20  | 4-34  | /    | /  | 3  | GRIPFDI           | 7      | 3-20 | 4  | QYGSPPGT     | 9          | -    | -     | -        |
| neGFP-M12-k24  | 1-3   | /    | /  | 4  | AGMAFDY           | 7      | 1-5  | 1  | QYNSYSWT     | 9          | -    | +     | -        |
| neGFP-M12-k25  | 4-39  | 7-27 | 3  | 4  | PGTGTNIDY         | 9      | 3-15 | 1  | QYNNWPRT     | 9          | +    | +     | -        |
| neGFP-M12-k26  | 4-34  | 7-27 | 1  | 4  | SRHARKELGLLDY     | 13     | 1-5  | 2  | QYNSYST      | 8          | -    | -     | -        |
| neGFP-M12-k29  | 4-34  | 7-27 | 3  | 3  | ARTRGHRDDAFDI     | 14     | 4-1  | 1  | QYYSTPWT     | 9          | -    | -     | -        |
| neGFP-M12-k30  | 4-61  | 3-9  | 2  | 3  | LGGFLTYGYNDAFDI   | 15     | 1-5  | 2  | QYNSYPYT     | 9          | -    | -     | -        |
| neGFP-M12-k32  | 6-1   | 2-21 | 2  | 4  | DGYCGGDCYSVDY     | 13     | 2-30 | 1  | MQGTHWPWT    | 9          | -    | -     | -        |
| neGFP-M12-k33  | 3-15  | 4-17 | 2  | 4  | VGEDPRDY          | 8      | 3-20 | 2  | QYGSPPYT     | 10         | -    | -     | -        |
| neGFP-M12-k37  | 1-18  | 7-27 | 1  | 6  | DLGMVGMVDV        | 9      | 3-20 | 1  | QYGSRT       | 8          | -    | -     | -        |
| neGFP-M12-k40  | 6-1   | 7-27 | 2  | 4  | GRGPPAGDFDY       | 11     | 2-30 | 1  | MQGTHWPWT    | 9          | -    | -     | -        |
| neGFP-M12-k44  | 4-34  | 5-5  | 2  | 3  | VQSGYSYGAFDI      | 13     | 3-20 | 4  | QYGSPPPT     | 9          | -    | -     | -        |
| neGFP-M12-k45# | 4-31  | 6-13 | 3  | 4  | DHGIAAAGTFDY      | 12     | 1-39 | 1  | QSYSTPRT     | 9          |      |       |          |
| neGFP-M12-k46  | 4-61  | 4-23 | 2  | 4  | DYGGNSVGYDFY      | 12     | 3-20 | 1  | QYGSPPWT     | 9          | -    | -     | -        |
|                | VH    | D    | RF | JH | CDR3(aa)          | Length | Vλ   | Jλ | CDR3(aa)     | Length     | Poly | HEp-2 | Staining |
| neGFP-M12-L04  | 3-11  | 3-22 | 2  | 4  | GRDYDSSGYDFY      | 14     | 2-18 | 2  | SSYSSSTLV    | 10         | -    | -     | -        |
| neGFP-M12-L05  | 3-11  | 1-7  | 3  | 5  | DWGDITGTNWDFP     | 13     | 2-23 | 2  | CSYAGSSTFV   | 11         | -    | -     | -        |
| neGFP-M12-L10# | 3-48  | 3-10 | 2  | 4  | DKPFDYGGSGSYNYDFY | 18     | 2-8  | 2  | SSYAGSNNLV   | 10         |      |       |          |
| neGFP-M12-L12# | 1-3   | 1-26 | 3  | 3  | SKLTPDAFDI        | 10     | 2-14 | 3  | SSYSSSTWV    | 10         |      |       |          |
| neGFP-M12-L14  | 3-15  | 3-3  | 3  | 4  | DPGITIFGVVIDY     | 13     | 2-14 | 3  | SSYSSSTLV    | 10         | -    | -     | -        |
| neGFP-M12-L15  | 1-2   | 6-6  | 2  | 2  | DLKREAGWYFDL      | 12     | 3-1  | 2  | QAWDSSTV     | 9          | -    | +     | -        |
| neGFP-M12-L18  | 3-33  | 6-13 | 2  | 4  | TGGYSSSWYDFY      | 12     | 2-14 | 2  | SSYSSSTPYV   | 12         | -    | -     | -        |
| neGFP-M12-L28# | 3-33  | 6-13 | 3  | 3  | DRRIAADDAFDI      | 13     | 1-44 | 1  | AAWDDSLNGPYV | 12         |      |       |          |
| neGFP-M12-L39  | 1-69  | 6-19 | 2  | 4  | DHSSGWYDFY        | 11     | 3-1  | 1  | QAWDSSTNYV   | 10         | -    | -     | -        |
| neGFP-M12-L42  | 5-51  | 7-27 | 2  | 2  | IPGDWYFDL         | 9      | 2-11 | 3  | CSYAGSYTWV   | 10         | -    | -     | -        |
| neGFP-M12-L47  | 3-23  | 7-27 | 1  | 4  | EELGIDY           | 7      | 1-47 | 3  | AAWDDSLSGWV  | 11         | -    | -     | -        |

RF, reading frame: # antibody failed to be expressed

- non reactive; +, reactive

c, diffuse cytoplasmic staining; N, nuclear staining, F, cytoplasmic fibers; V, vesicles

**Table S15:** Repertoire and reactivity of antibodies from GFP-positive new emigrant B cells expressing 620W PTPN22 from Mouse #12

| Ig             | HEAVY  |      |    |    |                    |        | LIGHT |    |              |        | REACTIVITY |       |          |
|----------------|--------|------|----|----|--------------------|--------|-------|----|--------------|--------|------------|-------|----------|
|                | VH     | D    | RF | JH | CDR3(aa)           | Length | Vκ    | Jκ | CDR3(aa)     | Length | Poly       | HEp-2 | Staining |
| neGFP+M12-K49  | 4-38-2 | /    | /  | 4  | DGRTFFDY           | 8      | 3-11  | 2  | QQRSNWPPYT   | 10     | +          | +     | N        |
| neGFP+M12-K50  | 4-34   | 6-13 | 2  | 3  | TGYSSSWYRAFDI      | 13     | 3-15  | 3  | QQYNNWPPGGP  | 11     | +          | +     | -        |
| neGFP+M12-K53  | 3-33   | /    | /  | 6  | DYYYYGMDV          | 9      | 3-20  | 3  | QQYGSSPT     | 8      | -          | +     | -        |
| neGFP+M12-K55  | 4-39   | 7-27 | 3  | 2  | AELGGGYWYFDL       | 12     | 1-5   | 1  | QQYNSYWT     | 8      | +          | +     | -        |
| neGFP+M12-K56  | 1-69   | /    | /  | 5  | VGPRRDWFDP         | 10     | 3-11  | 4  | QQRSNWLT     | 8      | +          | -     | -        |
| neGFP+M12-K58  | 1-69   | /    | /  | 4  | RGIGGLDY           | 8      | 1-5   | 2  | DYNYPYT      | 7      | -          | -     | -        |
| neGFP+M12-K60  | 3-23   | /    | /  | 4  | VGKAPDEKLTHYYFDY   | 16     | 1-5   | 4  | QQYNSYSLT    | 9      | -          | +     | -        |
| neGFP+M12-K63  | 4-4    | 7-27 | 3  | 3  | SVLLPGDQRHDAFDI    | 15     | 2-30  | 1  | MQGTHWPPTVRT | 12     | -          | +     | -        |
| neGFP+M12-K65  | 1-69   | 1-26 | 2  | 4  | VSGSYYYFDY         | 10     | 3-20  | 2  | QQYGSSPRYT   | 10     | +          | +     | -        |
| neGFP+M12-K68  | 4-59   | /    | /  | 2  | DGDWYFDL           | 8      | 1-NL1 | 3  | QQYYSTPFT    | 9      | -          | +     | -        |
| neGFP+M12-K70  | 3-33   | /    | /  | 4  | DLGRFDY            | 7      | 1-39  | 2  | QQSYSTPQYT   | 10     | -          | +     | -        |
| neGFP+M12-K71  | 3-48   | 7-27 | 3  | 4  | GATGDSFDY          | 9      | 1D-8  | 1  | QQYYSFPWT    | 9      | -          | -     | -        |
| neGFP+M12-K81  | 3-21   | /    | /  | 4  | DSWPSYYFDY         | 10     | 3-15  | 3  | QQYNNWPFT    | 9      | -          | +     | -        |
| neGFP+M12-K91  | 4-39   | /    | /  | 3  | HSTEKKNDAFDI       | 12     | 2-28  | 4  | MQUALQTPLS   | 9      | -          | +     | -        |
| neGFP+M12-K92# | 1-69   | 5-5  | 2  | 5  | YLLGYSYGYWFDP      | 13     | 3-20  | 4  | QQYGSSPLT    | 9      |            |       |          |
| neGFP+M12-K95  | 3-64D  | 7-27 | 3  | 3  | DRQLTGDLHDAFDI     | 14     | 1-5   | 1  | QQYNSYWGT    | 9      | -          | -     | -        |
|                | VH     | D    | RF | JH | CDR3(aa)           | Length | Vλ    | Jλ | CDR3(aa)     | Length | Poly       | HEp-2 | Staining |
| neGFP+M12-L57  | 4-39   | /    | /  | 4  | LGADRGWYFDY        | 11     | 3-21  | 3  | QVWDSSSDHWV  | 11     | -          | +     | -        |
| neGFP+M12-L61# | 3-30   | 3-10 | 2  | 4  | ERLQSYGSGSYFDY     | 16     | 2-11  | 3  | CSYAGSYTWV   | 10     |            |       |          |
| neGFP+M12-L69# | 4-34   | 2-2  | 2  | 1  | AGLGYCSSTSCYAEIFQH | 18     | 2-23  | 7  | CSYAGSSTGHAV | 12     |            |       |          |
| neGFP+M12-L80  | 1-69   | 6-6  | 2  | 5  | NDSSNWFPD          | 9      | 2-23  | 1  | CSYAGSYV     | 8      | -          | -     | -        |
| neGFP+M12-L82  | 4-34   | 4-11 | 3  | 4  | GGRMTTVTDYFDY      | 13     | 1-44  | 3  | AAWDDSLNGWV  | 11     | -          | -     | -        |
| neGFP+M12-L83  | 3-53   | 3-16 | 3  | 2  | DQFGDRTLHFDL       | 12     | 3-21  | 2  | QVWDSSSDHPV  | 11     | -          | -     | -        |
| neGFP+M12-L84# | 4-34   | 6-13 | 3  | 4  | RQTAAAFDY          | 9      | 2-23  | 1  | CSYAGSSTYV   | 10     |            |       |          |
| neGFP+M12-L85  | 4-39   | 7-27 | 3  | 2  | RVLGIGRYFDL        | 11     | 3-21  | 1  | QVWDSSSDLYV  | 11     | -          | -     | -        |
| neGFP+M12-L86  | 3-49   | 7-27 | 3  | 4  | DLETGDLGFDY        | 11     | 2-23  | 2  | CSYAGSSTVV   | 10     | -          | -     | -        |
| neGFP+M12-L92  |        |      |    |    | see kappa          |        | 2-14  | 2  | SSYTSSTVV    | 10     | +          | -     | -        |
| neGFP+M12-L96  | 4-61   | 6-6  | 2  | 5  | EGFHERWDSSSSNWFPD  | 17     | 2-23  | 3  | CSYAGSSTWV   | 10     | -          | -     | -        |

RF, reading frame: # antibody failed to be expressed

- non reactive; +, reactive

c, diffuse cytoplasmic staining; N, nuclear staining, F, cytoplasmic fibers; V, vesicles

**Table S16:** Repertoire and reactivity of antibodies from GFP-negative new emigrant B cells of Mouse #13

| Ig             | HEAVY |      |    |    |                   |        | LIGHT |    |                |        | REACTIVITY |       |          |
|----------------|-------|------|----|----|-------------------|--------|-------|----|----------------|--------|------------|-------|----------|
|                | VH    | D    | RF | JH | CDR3(aa)          | Length | Vκ    | Jκ | CDR3(aa)       | Length | Poly       | HEp-2 | Staining |
| neGFP-M13-K03  | 3-15  | 2-15 | 2  | 6  | DPPYCSGGSCYYYGMDV | 17     | 2-30  | 1  | MQGTHWPRT      | 9      | -          | -     | -        |
| neGFP-M13-K04  | 3-15  | /    | /  | 4  | DNSNYFDY          | 8      | 2-24  | 2  | MQATQFPYT      | 9      | -          | -     | -        |
| neGFP-M13-K06# | 4-34  | 6-6  | 2  | 4  | GGEYSSSYFDY       | 11     | 1-9   | 3  | QQLNSYPT       | 8      |            |       |          |
| neGFP-M13-K11  | 1-3   | /    | /  | 3  | VGTGNDAFDI        | 10     | 3-15  | 1  | QQYNNWPPWT     | 10     | -          | +     | -        |
| neGFP-M13-K13  | 4-61  | 6-6  | 1  | 4  | VVEGQLVDY         | 9      | 3-15  | 2  | QQYNNWPLYT     | 10     | +          | +     | -        |
| neGFP-M13-K16  | 3-20  | /    | /  | 4  | RWKGYFDY          | 9      | 3-11  | 3  | QQRSNWPPFT     | 10     | -          | +     | -        |
| neGFP-M13-K18  | 3-13  | 6-6  | 2  | 2  | GEYSSDWWYFDL      | 12     | 1-17  | 2  | LQHNSYPHT      | 9      | -          | -     | -        |
| neGFP-M13-K20  | 3-15  | 1-26 | 2  | 4  | GWRVFGSYFDY       | 13     | 1-9   | 3  | QQLNSYPFT      | 9      | -          | -     | -        |
| neGFP-M13-K25  | 4-4   | /    | /  | 4  | DGFQYYYYYY        | 10     | 3-20  | 3  | QQYGSSPFT      | 9      | -          | -     | -        |
| neGFP-M13-K27  | 3-11  | 1-26 | 3  | 4  | DGVGATDY          | 8      | 1-5   | 2  | QQYNSYSY       | 9      | -          | -     | -        |
| neGFP-M13-K32# | 3-7   | 1-1  | 1  | 2  | VQLGIVRWYFDL      | 12     | 3-20  | 3  | QQYGSSPHNVTEFT | 15     |            |       |          |
| neGFP-M13-K39# | 4-59  | 6-19 | 2  | 4  | GGSGWYFDY         | 10     | 3-11  | 4  | QQRSNWPPLT     | 10     |            |       |          |
| neGFP-M13-K40  | 3-30  | 1-26 | 2  | 4  | DGHSGSYFDY        | 10     | 1-17  | 2  | LQHNSYPYT      | 9      | -          | -     | -        |
|                | VH    | D    | RF | JH | CDR3(aa)          | Length | VI    | Jl | CDR3(aa)       | Length | Poly       | HEp-2 | Staining |
| neGFP-M13-L02  | 3-33  | 5-24 | 2  | 4  | DWDGYNDY          | 8      | 1-47  | 1  | AAWDDSLSGYV    | 11     | -          | -     | -        |
| neGFP-M13-L09  | 5-51  | 7-27 | 3  | 4  | HEDSGLTGDHYFDY    | 14     | 2-14  | 1  | SSYTSSSTLV     | 10     | -          | -     | -        |
| neGFP-M13-L14# | 3-30  | 7-27 | 3  | 2  | QSRLGTWYFDL       | 11     | 2-14  | 2  | SSYTSSSTLV     | 10     |            |       |          |
| neGFP-M13-L17  | 3-33  | 6-13 | 3  | 4  | EESIAAAGTDY       | 11     | 2-23  | 2  | CSYAGSSTFV     | 11     | -          | -     | -        |
| neGFP-M13-L28  | 3-7   | 6-13 | 2  | 4  | DPGYSSSWFDY       | 11     | 2-23  | 2  | CSYAGSHVV      | 9      | -          | -     | -        |
| neGFP-M13-L30  | 3-15  | 6-13 | 3  | 4  | AIAAAGNY          | 8      | 2-23  | 3  | CSYAGSSTWV     | 10     | -          | -     | -        |
| neGFP-M13-L46  | 3-30  | 4-11 | 2  | 4  | ARHDYSNYFDY       | 11     | 2-14  | 1  | SSYTSSSTYV     | 10     | -          | +     | -        |

RF, reading frame: # antibody failed to be expressed

- non reactive; +, reactive

c, diffuse cytoplasmic staining; N, nuclear staining, F, cytoplasmic fibers; V, vesicles

**Table S17:** Repertoire and reactivity of antibodies from GFP-positive new emigrant B cells expressing 620W PTPN22 from Mouse #13

| Ig             | HEAVY  |      |    |    |                 |        | LIGHT |    |             |        | REACTIVITY |       |          |
|----------------|--------|------|----|----|-----------------|--------|-------|----|-------------|--------|------------|-------|----------|
|                | VH     | D    | RF | JH | CDR3(aa)        | Length | Vκ    | Jκ | CDR3(aa)    | Length | Poly       | HEp-2 | Staining |
| neGFP+M13-K49  | 4-39   | 6-6  | 2  | 4  | RGYSSSFYD       | 9      | 1-5   | 1  | QQYNSYSWT   | 9      | -          | +     | -        |
| neGFP+M13-K54# | 3-11   | 1-26 | 2  | 4  | EAQSGSYYY       | 9      | 3-15  | 1  | QQYNNWPRT   | 9      |            |       |          |
| neGFP+M13-K56  | 3-11   | 3-10 | 2  | 2  | REGSGSYYNWYFDL  | 14     | 1-39  | 2  | QQSYSPTYT   | 9      | -          | -     | -        |
| neGFP+M13-K59  | 3-7    | 3-22 | 2  | 3  | DRGYDSSGYSDAFDI | 16     | 1-NL1 | 2  | QQYYSTPRT   | 9      | -          | +     | -        |
| neGFP+M13-K60  | 1-46   | 7-27 | 2  | 3  | QNWGDAFDI       | 9      | 1-17  | 3  | LQHNSYPFT   | 9      | +          | -     | -        |
| neGFP+M13-K62# | 2-15   | 2-15 | 2  | 4  | GSCSGGSCYFDY    | 12     | 4-1   | 2  | QQYYSTPPT   | 9      |            |       |          |
| neGFP+M13-K64# | 3-30   | 7-27 | 3  | 6  | DRTGDLHYYYGMDV  | 14     | 3-20  | 2  | QQYGSSPYT   | 9      |            |       |          |
| neGFP+M13-K66  | 3-23   | 3-10 | 1  | 5  | DEFGENNWFDP     | 12     | 1-39  | 2  | QQSYSPTYT   | 9      | +          | -     | -        |
| neGFP+M13-K74# | 4-4    | 7-27 | 2  | 4  | RNWGVSGY        | 8      | 1D-8  | 4  | QQYYSFPLT   | 9      |            |       |          |
| neGFP+M13-K77  | 4-4    | 5-5  | 1  | 3  | VPGIQLWLKGAFDI  | 14     | 3-20  | 1  | QQYGSSRT    | 8      | -          | -     | -        |
| neGFP+M13-K90  | 3-33   | /    | /  | 4  | APPVLGGENYYFDY  | 14     | 3-20  | 4  | QQYGSSPLT   | 9      | -          | +     | -        |
| neGFP+M13-K91  | 4-31   | 7-27 | 3  | 4  | GVVTGDFDY       | 9      | 1-16  | 5  | QQYNSYPIT   | 9      | -          | -     | N        |
|                | VH     | D    | RF | JH | CDR3(aa)        | Length | Vλ    | Jλ | CDR3(aa)    | Length | Poly       | HEp-2 | Staining |
| neGFP+M13-L50# | 3-33   | 6-6  | 2  | 2  | ARDSSSSWYFDL    | 12     | 6-57  | 7  | QPYDSSNHAV  | 10     |            |       |          |
| neGFP+M13-L52  | 3-15   | 1-26 | 2  | 2  | NHYSGSYNYWYFDL  | 14     | 1-51  | 1  | GTWDSSLSAYV | 11     | -          | -     | -        |
| neGFP+M13-L53  | 3-30-3 | 6-6  | 3  | 2  | ERGRITIAARYFDL  | 13     | 2-14  | 1  | SSYTSSSTLV  | 10     | -          | +     | -        |
| neGFP+M13-L61  | 3-23   | /    | /  | 4  | DLILVLA         | 7      | 2-23  | 3  | CSYAGSRV    | 8      | -          | +     | -        |
| neGFP+M13-L63  | 4-39   | 4-11 | 2  | 2  | PPWFDDYSNYWYFDL | 15     | 3-1   | 2  | QAWDSSTAV   | 9      | +          | +     | -        |
| neGFP+M13-L65  | 3-53   | /    | /  | 2  | GLRDGAAWYFDL    | 12     | 2-23  | 3  | CSYAGSSTWV  | 10     | -          | -     | -        |
| neGFP+M13-L72# | 3-53   | 3-10 | 3  | 2  | ASWPGVWYFDL     | 11     | 2-23  | 3  | CSYAGSYTWA  | 10     |            |       |          |
| neGFP+M13-L73  | 5-10-1 | 6-13 | 3  | 1  | LVRIAAAGTEYFQH  | 14     | 2-14  | 3  | SSYTSSSTLV  | 10     | -          | +     | -        |
| neGFP+M13-L88  | 4-34   | 4-17 | 2  | 2  | GNDYGDYWYFDL    | 12     | 2-23  | 3  | CSYAGSHWV   | 9      | -          | +     | -        |
| neGFP+M13-L93  | 4-23   | 4-23 | 2  | 6  | GSGVYGGNYYYGMDV | 16     | 2-14  | 3  | SSYTSSSTGWV | 11     | -          | +     | -        |

RF, reading frame: # antibody failed to be expressed

- non reactive; +, reactive

c, diffuse cytoplasmic staining; N, nuclear staining, F, cytoplasmic fibers; V, vesicles



**Table S18:** Repertoire and reactivity of antibodies GFP-positive new emigrant B cells expressing R620 PTPN22 from Mouse #14

| Ig             | HEAVY  |      |    |    |                        |        | LIGHT |    |               |        |      | REACTIVITY |          |  |
|----------------|--------|------|----|----|------------------------|--------|-------|----|---------------|--------|------|------------|----------|--|
|                | VH     | D    | RF | JH | CDR3(aa)               | Length | Vκ    | Jκ | CDR3(aa)      | Length | Poly | HEp-2      | Staining |  |
| neGFP+M14-K12  | 4-34   | 3-22 | 3  | 6  | LVVKSYYYYGMDV          | 14     | 1-9   | 4  | QQLNSYPLT     | 9      | -    | +          | -        |  |
| neGFP+M14-K20  | 3-48   | 3-22 | 2  | 2  | DGTDYYDSSGGYWFYDL      | 17     | 3-20  | 4  | QQYGSSPLT     | 9      | -    | +          | -        |  |
| neGFP+M14-K21  | 3-21   | 4-17 | 2  | 4  | ANYGDYFDY              | 9      | 3-15  | 4  | QQYNNWPLT     | 9      | -    | -          | -        |  |
| neGFP+M14-K27  | 3-23   | 3-10 | 2  | 4  | LIVREMATLYGSGSYQNY     | 19     | 1-5   | 4  | QQYNSYPLT     | 9      | -    | -          | -        |  |
| neGFP+M14-K29  | 1-69   | 6-13 | 2  | 5  | NGVYSSSWYWFDP          | 13     | 4-1   | 2  | QQYSTPPYT     | 10     | +    | -          | -        |  |
| neGFP+M14-K30  | 3-30   | 4-17 | 2  | 4  | DVYGDYFDY              | 9      | 1-39  | 2  | QSYSTPYT      | 9      | -    | -          | -        |  |
| neGFP+M14-K33  | 1-3    | 1-26 | 2  | 4  | DLGVSGSYFDY            | 12     | 3-20  | 4  | QQYGSSLT      | 8      | -    | -          | -        |  |
|                | VH     | D    | RF | JH | CDR3(aa)               | Length | Vλ    | Jλ | CDR3(aa)      | Length | Poly | HEp-2      | Staining |  |
| neGFP+M14-L01  | 3-15   | 6-19 | 3  | 4  | GTHYFDY                | 7      | 3-27  | 2  | YSAADNNLV     | 9      | -    | -          | -        |  |
| neGFP+M14-L02  | 3-30-3 | 6-13 | 3  | 4  | EKAGTHYFDY             | 10     | 2-18  | 1  | SSYTSSSTYV    | 10     | -    | +          | -        |  |
| neGFP+M14-L07  | 3-30   | 1-26 | 2  | 4  | DDSGSYLIDY             | 10     | 1-44  | 3  | AAWDDSLNGL    | 10     | -    | -          | -        |  |
| neGFP+M14-L08# | 3-30-3 | 6-13 | 3  | 6  | NVAAAGTYPYSAVFYYYYGMDV | 21     | 3-25  | 1  | QSADSSGTIV    | 10     |      |            |          |  |
| neGFP+M14-L09# | 3-7    | 3-22 | 2  | 4  | GHSSGYHYFDY            | 12     | 2-14  | 2  | SSYTSSSTGV    | 10     |      |            |          |  |
| neGFP+M14-L11  | 4-4    | 4-17 | 2  | 4  | GTDDYGDNRERNYFDY       | 16     | 2-14  | 2  | SSYTSSSTP     | 9      | -    | -          | -        |  |
| neGFP+M14-L13  | 4-59   | 7-27 | 3  | 4  | QGKITGEGNFDY           | 12     | 2-18  | 2  | SSYTSSSTLVV   | 11     | -    | -          | -        |  |
| neGFP+M14-L14  | 4-39   | 3-22 | 2  | 5  | HERYYYYDSSGYNWFDP      | 17     | 1-51  | 3  | GTWDSSLSVNWV  | 12     | -    | -          | -        |  |
| neGFP+M14-L24# | 1-3    | 3-3  | 2  | 4  | TDTVRTDYDFWWSGYSY      | 16     | 2-14  | 2  | SSYTSSSVV     | 9      |      |            |          |  |
| neGFP+M14-L25# | 1-3    | 2-15 | 2  | 4  | NSIDCSGGSCYFDY         | 14     | 1-40  | 1  | QSYDSSLGSGV   | 11     |      |            |          |  |
| neGFP+M14-L31  | 3-30-3 | 6-13 | 3  | 4  | EKAGTHYFDY             | 10     | 2-18  | 2  | SSYTSSSTFE    | 10     | -    | -          | -        |  |
| neGFP+M14-L39  | 4-34   | 2-2  | 2  | 4  | RLHRGSTSCYDY           | 12     | 2-14  | 2  | SSYTSSSTVV    | 10     | -    | +          | -        |  |
| neGFP+M14-L40  | 3-23   | 6-6  | 2  | 4  | RLLTSSCDSGFDY          | 13     | 1-40  | 1  | QSYDSSLGSGFYV | 12     | -    | -          | -        |  |
| neGFP+M14-L45# | 4-34   | 6-13 | 3  | 3  | GIAAADDAFDI            | 11     | 2-14  | 3  | SSYTSSSWV     | 9      |      |            |          |  |
|                | VH     | D    | RF | JH | CDR3(aa)               |        |       |    |               |        |      |            |          |  |
| neGFP+M14-H16  | 4-61   | /    | /  | 4  | ATKLLSFDY              | 9      |       |    |               |        |      |            |          |  |
| neGFP+M14-L18  | 3-21   | 2-2  | 3  | 4  | DQSPSHDIVVPAAIYFDY     | 19     |       |    |               |        |      |            |          |  |
| neGFP+M14-H48  | 1-46   | 3-16 | 1  | 4  | DHHYEGLRLGELSLFDY      | 17     |       |    |               |        |      |            |          |  |

RF, reading frame : #antibody failed to be expressed

- non reactive ; +, reactive

c, diffuse cytoplasmic staining ; N, nuclear staining, F, cytoplasmic fibers ; V, vesicles

**Table S19:** Repertoire and reactivity of antibodies from GFP-positive new emigrant B cells expressing R620 PTPN22 from Mouse #15

| Ig             | HEAVY  |      |    |    |                    |        | LIGHT |    |               |        | REACTIVITY |       |          |
|----------------|--------|------|----|----|--------------------|--------|-------|----|---------------|--------|------------|-------|----------|
|                | VH     | D    | RF | JH | CDR3(aa)           | Length | Vκ    | Jκ | CDR3(aa)      | Length | Poly       | HEp-2 | Staining |
| neGFP+M15-K49  | 3-33   | 6-13 | 2  | 3  | STRTYSSSWYAFDI     | 14     | 1-33  | 5  | QQYDNLPLSFKVT | 13     | -          | +     | -        |
| neGFP+M15-K51  | 3-30-3 | 6-6  | 2  | 3  | RRIHYSSSLDAFDI     | 14     | 3-20  | 1  | QQYGSSRT      | 8      | +          | +     | -        |
| neGFP+M15-K52  | 3-33   | 3-16 | 2  | 4  | EAWWGFYD           | 8      | 1-6   | 1  | LQDYNYPWT     | 9      | -          | -     | -        |
| neGFP+M15-K59  | 4-34   | 4-17 | 2  | 4  | GLYGDYFDY          | 9      | 1-8   | 1  | QQYYSYPRT     | 9      | -          | -     | -        |
| neGFP+M15-K60  | 3-72   | 7-27 | 3  | 3  | AGLTGVGAFDI        | 11     | 3-20  | 1  | QQYGSSRT      | 8      | -          | -     | -        |
| neGFP+M15-K67  | 3-74   | 3-3  | 1  | 4  | DEGYLRFYD          | 9      | 1-17  | 4  | LQHNSYPLT     | 9      | -          | -     | -        |
| neGFP+M15-K77  | 4-34   | 3-9  | 2  | 4  | AGYYDILTYGYYFDY    | 15     | 3-20  | 4  | QQYGSSPAKLT   | 11     | -          | +     | -        |
| neGFP+M15-K79# | 3-30   | 3-3  | 2  | 6  | DHDFWSGYYYYYGMVDV  | 16     | 1-12  | 4  | QQANSFPLT     | 9      |            |       |          |
| neGFP+M15-K80  | 3-33   | 6-6  | 2  | 4  | DPYSSSYFDY         | 11     | 1-39  | 4  | QQSYSTPLT     | 9      | -          | -     | -        |
| neGFP+M15-K83  | 3-43   | 4-17 | 2  | 4  | AIDYGDYFDY         | 11     | 1-5   | 2  | QQYNSYSYT     | 9      | -          | -     | -        |
| neGFP+M15-K86  | 4-61   | 3-22 | 2  | 4  | GGRQQRSGYFDY       | 12     | 3-20  | 4  | QQYGSSPFT     | 9      | -          | +     | -        |
| neGFP+M15-K94  | 4-39   | 3-22 | 2  | 4  | HQIDSRSTYYDSSGYFDY | 20     | 3-20  | 3  | QQYGSSPT      | 8      | -          | -     | -        |
|                | VH     | D    | RF | JH | CDR3(aa)           | Length | Vλ    | Jλ | CDR3(aa)      | Length | Poly       | HEp-2 | Staining |
| neGFP+M15-L54# | 1-46   | 1-1  | 1  | 4  | DLQLGRYFDY         | 11     | 2-23  | 1  | CSYAGSSTSYV   | 11     |            |       |          |
| neGFP+M15-L55  | 1-2    | 6-6  | 2  | 4  | SPDSSSMKLPYFDY     | 15     | 2-23  | 1  | CSYAGSSTV     | 9      | -          | -     | -        |
| neGFP+M15-L57  | 1-2    | 7-27 | 2  | 3  | DLREANWDAFDI       | 12     | 2-23  | 1  | CSYAGSSTV     | 9      | -          | -     | -        |
| neGFP+M15-L66  | 4-61   | 6-6  | 2  | 3  | YSSSFFAFDI         | 11     | 1-51  | 1  | GTWDSLSLAHV   | 11     | -          | -     | -        |
| neGFP+M15-L89  | 1-8    | 2-2  | 2  | 6  | GYCSSTSCYYYYYMDV   | 16     | 1-44  | 3  | AAWDDSLNGPV   | 11     | -          | -     | -        |
|                | VH     | D    | RF | JH | CDR3(aa)           | Length |       |    |               |        |            |       |          |
| neGFP+M15-H62  | 4-31   | 7-27 | 3  | 3  | DRRGDLGAFDI        | 11     |       |    |               |        |            |       |          |
| neGFP+M15-H69  | 3-15   | 4-23 | 2  | 3  | NYGGNKNAFDI        | 11     |       |    |               |        |            |       |          |
| neGFP+M15-H93  | 4-61   | 6-6  | 3  | 4  | SIAARPVYD          | 9      |       |    |               |        |            |       |          |

RF, reading frame: # antibody failed to be expressed

- non reactive; +, reactive

c, diffuse cytoplasmic staining; N, nuclear staining, F, cytoplasmic fibers; V, vesicles

**Table S20:** Repertoire and reactivity of antibodies from GFP-positive new emigrant B cells expressing 263Q PTPN22 from Mouse #16

| Ig             | HEAVY |      |    |    |                  |        | LIGHT |    |             |        | REACTIVITY |       |          |
|----------------|-------|------|----|----|------------------|--------|-------|----|-------------|--------|------------|-------|----------|
|                | VH    | D    | RF | JH | CDR3(aa)         | Length | Vκ    | Jκ | CDR3(aa)    | Length | Poly       | HEp-2 | Staining |
| neGFP+M16-K2   | 3-30  | 1-26 | 2  | 4  | TDHSGSYFDY       | 10     | 1-5   | 2  | QQYNSYSMYT  | 10     | -          | -     | -        |
| neGFP+M16-K9   | 3-11  | 7-27 | 2  | 3  | SETNWXGDDAFDI    | 12     | 3-11  | 3  | QQRSNWPFT   | 9      | -          | -     | -        |
| neGFP+M16-K10  | 4-34  | 7-27 | 3  | 4  | EARTGAFFDY       | 10     | 1-5   | 2  | QQYNNYSYS   | 9      | -          | +     | -        |
| neGFP+M16-K19  | 3-33  | 3-3  | 2  | 3  | DYNFWSGYYTGDAFDI | 16     | 2-28  | 4  | MQALQTPLT   | 9      | -          | +     | -        |
| neGFP+M16-K21  | 3-30  | 7-27 | 2  | 4  | HEDPNWGXPLDY     | 12     | 1-39  | 4  | QSYSYTPLT   | 9      | -          | -     | -        |
| neGFP+M16-K24  | 4-34  | 4-17 | 2  | 4  | GVFDDPLDYGDYFDY  | 15     | 1-17  | 1  | LQHNSYPRT   | 9      | -          | -     | -        |
| neGFP+M16-K32  | 3-30  | 4-17 | 2  | 4  | GLGYGDYVSLYFDY   | 14     | 4-1   | 2  | QQYYSTAYT   | 9      | -          | -     | -        |
| neGFP+M16-K33# | 4-59  | 5-5  | 3  | 4  | AQEAMVIFDY       | 10     | 1D-8  | 4  | QQYYSFPLT   | 9      |            |       |          |
| neGFP+M16-K37# | 4-34  | 3-10 | 3  | 4  | APITMVRGVPIYFDY  | 15     | 3-11  | 5  | QQRSNWIT    | 8      |            |       |          |
| neGFP+M16-K41  | 4-34  | 2-2  | 2  | 3  | LPCSSTSCYAFDI    | 13     | 3-11  | 4  | QQRSTWPPT   | 9      | -          | -     | -        |
| neGFP+M16-K42# | 3-33  | /    | /  | 3  | DGAPGTGAFDI      | 11     | 1-39  | 1  | QSYSYTPWT   | 9      |            |       |          |
| neGFP+M16-K44  | 4-61  | 6-13 | 2  | 2  | DQRYSSSWYWFYDL   | 14     | 1-39  | 3  | QSYSYTPFT   | 9      | +          | -     | -        |
| neGFP+M16-K45# | 3-33  | 1-1  | 3  | 4  | EPTGTTGTFDY      | 11     | 3-20  | 2  | QQYGSSPPYT  | 10     |            |       |          |
|                | VH    | D    | RF | JH | CDR3(aa)         | Length | Vλ    | Jλ | CDR3(aa)    | Length | Poly       | HEp-2 | Staining |
| neGFP+M16-L1#  | 3-15  | /    | /  | 4  | GCGADGY          | 7      | 2-14  | 3  | SSYTSSGWV   | 9      |            |       |          |
| neGFP+M16-L8   | 4-34  | 4-17 | 2  | 4  | TFYGDYFDY        | 9      | 2-14  | 3  | SSYTSSSTWV  | 10     | -          | -     | -        |
| neGFP+M16-L15  | 3-30  | 6-19 | 2  | 4  | ADSSGWYFFDY      | 11     | 1-47  | 3  | AAWDDSLSGQV | 11     | -          | -     | -        |
| neGFP+M16-L16  | 6-1   | 5-5  | 1  | 4  | GQLWFDY          | 7      | 2-14  | 1  | SSYTSSSTKV  | 10     | -          | -     | -        |
| neGFP+M16-L20  | 3-15  | 2-21 | 3  | 1  | AGVVVTAIRAEYFQH  | 15     | 3-1   | 2  | QAWDSSTAVV  | 10     | -          | -     | -        |
| neGFP+M16-L26  | 3-23  | /    | /  | 4  | DRRYFFDY         | 8      | 1-40  | 3  | QSYDSSLSGWV | 11     | -          | +     | -        |
| neGFP+M16-L27  | 3-7   | 6-19 | 2  | 4  | TSSGWYFFDY       | 9      | 2-11  | 1  | CSYAGSYTFV  | 10     | -          | -     | -        |
| neGFP+M16-L29  | 4-39  | /    | /  | 4  | SARDFDY          | 7      | 1-47  | 3  | AAWDDSLSGWV | 11     | +          | +     | -        |
| neGFP+M16-L31  | 3-74  | 6-6  | 2  | 4  | DRIGDSSSYFFDY    | 13     | 3-1   | 2  | QAWDSSTVV   | 9      | -          | -     | -        |
| neGFP+M16-L36  | 4-59  | /    | /  | 3  | PGPGHDAFDI       | 10     | 2-23  | 3  | CSYAGYWV    | 8      | -          | -     | -        |
| neGFP+M16-L37# | 4-34  | 3-10 | 3  | 4  | APITMVRGVPIYFDY  | 15     | 1-47  | 2  | AAWDDSLSGVV | 11     |            |       |          |
| neGFP+M16-L40  | 4-34  | 6-6  | 3  | 3  | GKAARAFDI        | 9      | 3-1   | 2  | QAWDSSTVV   | 9      | -          | -     | -        |
| neGFP+M16-L43# | 4-59  | 6-19 | 3  | 3  | DGGIADAFDI       | 12     | 3-10  | 3  | YSTDSSGNHRV | 11     |            |       |          |
|                | VH    | D    | RF | JH | CDR3(aa)         | Length |       |    |             |        |            |       |          |
| neGFP+M16-K23  | 3-15  | 6-13 | 2  | 4  | DLREYSSSWRFDY    | 13     |       |    |             |        |            |       |          |
| neGFP+M16-K35  | 4-34  | 1-26 | 2  | 4  | GLGSYFFDY        | 9      |       |    |             |        |            |       |          |
| neGFP+M16-L38  | 4-59  | 3-9  | 2  | 3  | AHYDILTGYAFDI    | 14     |       |    |             |        |            |       |          |
| neGFP+M16-L39  | 1-46  | 6-13 | 2  | 4  | DRSLPYSSSWYFFDY  | 15     |       |    |             |        |            |       |          |

RF, reading frame: # antibody failed to be expressed

- non reactive; +, reactive

c, diffuse cytoplasmic staining; N, nuclear staining, F, cytoplasmic fibers; V, vesicles

**Table S21: Repertoire and reactivity of antibodies from GFP-positive new emigrant B cells expressing 263Q PTPN22 from Mouse #17**

| Ig             | HEAVY  |      |    |    |                  |        | LIGHT |    |             |        | REACTIVITY |       |          |
|----------------|--------|------|----|----|------------------|--------|-------|----|-------------|--------|------------|-------|----------|
|                | VH     | D    | RF | JH | CDR3(aa)         | Length | Vk    | Jk | CDR3(aa)    | Length | Poly       | HEp-2 | Staining |
| neGFP+M17-K1   | 3-30-3 | 1-7  | 2  | 4  | VPASNWNYFDY      | 11     | 1D-8  | 2  | QQYYSFPYT   | 9      | -          | -     | -        |
| neGFP+M17-K4   | 3-23D  | 7-27 | 2  | 4  | SDWGYFDY         | 8      | 3-11  | 1  | QQRSTWPRT   | 9      | -          | -     | -        |
| neGFP+M17-K10  | 3-30-3 | 6-13 | 3  | 3  | WRAAADAFDI       | 10     | 1-17  | 4  | LQHNSYPLT   | 9      | -          | -     | -        |
| neGFP+M17-K14  | 4-34   | 7-27 | 2  | 2  | LKKANWGSSTHWFYDL | 16     | 3-11  | 3  | QQRSNWPLT   | 9      | +          | +     | -        |
| neGFP+M17-K15  | 3-30   | 6-13 | 2  | 4  | DVSSSWYFDY       | 10     | 1D-8  | 2  | QQYYSFPYT   | 9      | -          | -     | -        |
| neGFP+M17-K32  | 4-34   | 6-6  | 3  | 6  | RPPSIAARYYYYMDV  | 16     | 3-11  | 4  | QQRSNWLT    | 8      | +          | +     | -        |
| neGFP+M17-K48# | 3-30-3 | 6-6  | 2  | 4  | GTEYSSSYFDY      | 12     | 1D-8  | 1  | QQYYSFPWT   | 9      |            |       |          |
| neGFP+M17-K55  | 3-33   | 7-27 | 3  | 4  | DRPTGDLDY        | 9      | 3-11  | 4  | QQRSNWPPLT  | 10     | -          | +     | -        |
| neGFP+M17-K72  | 3-30   | 6-19 | 2  | 4  | DGAYSSGWYFDY     | 13     | 1D-8  | 2  | QQYYSFPYT   | 9      | -          | -     | -        |
| neGFP+M17-K78  | 4-39   | 6-19 | 3  | 4  | ILTAGVDY         | 8      | 1-39  | 1  | QQSYSTPPT   | 9      | -          | -     | -        |
| neGFP+M17-K80  | 3-30   | 6-13 | 2  | 4  | DVSSSWYFDY       | 10     | 1D-8  | 2  | QQYYSFPYT   | 9      | -          | -     | -        |
| neGFP+M17-K83  | 3-30-3 | 1-7  | 2  | 4  | VPASNWNYFDY      | 11     | 1D-8  | 2  | QQYYSFPYT   | 9      | -          | -     | -        |
| neGFP+M17-K89  | 3-30-3 | 6-6  | 2  | 4  | GTEYSSSYFDY      | 12     | 1D-8  | 1  | QQYYSFPWT   | 9      | -          | -     | -        |
| neGFP+M17-K90  | 3-15   | 6-13 | 2  | 4  | DHVVSSSWYFDY     | 12     | 3-15  | 3  | QQYNNWLPFT  | 10     | -          | -     | -        |
|                | VH     | D    | RF | JH | CDR3(aa)         | Length | Vλ    | Jλ | CDR3(aa)    | Length | Poly       | HEp-2 | Staining |
| neGFP+M17-L3   | 4-34   | 3-10 | 3  | 2  | GIRAYWYFDL       | 10     | 2-14  | 1  | SSYTSSTKV   | 10     | -          | -     | -        |
| neGFP+M17-L6   | 1-2    | 3-3  | 3  | 4  | IFGVVIYY         | 8      | 2-14  | 3  | SSYTSSTWV   | 10     | -          | +     | -        |
| neGFP+M17-L7   | 3-23   | 6-6  | 2  | 1  | DDRFKYSSSYFQH    | 14     | 2-14  | 1  | SSYTSSTLYV  | 11     | -          | -     | -        |
| neGFP+M17-L16  | 1-2    | 3-3  | 3  | 4  | IFGVVIYY         | 8      | 2-14  | 3  | SSYTSSTWV   | 10     | -          | +     | -        |
| neGFP+M17-L19  | 1-2    | 3-10 | 1  | 4  | EPWFGYFDY        | 11     | 2-14  | 3  | SSYTSSTRV   | 10     | -          | -     | -        |
| neGFP+M17-L25  | 3-30-3 | 1-26 | 3  | 4  | DQGVGRFDY        | 9      | 1-40  | 2  | QSYDSSLGGSV | 11     | -          | -     | -        |
| neGFP+M17-L38  | 3-23D  | 6-13 | 3  | 4  | KVPAAGIFDY       | 10     | 5-37  | 1  | MIWPSNAYV   | 9      | -          | -     | -        |
| neGFP+M17-L39  | 3-48   | 5-24 | 2  | 4  | DRRGTGFDY        | 9      | 2-11  | 1  | CSYAGSYTYV  | 10     | -          | -     | -        |
| neGFP+M17-L40  | 3-7    | /    | /  | 4  | ISRAFDY          | 7      | 2-11  | 3  | CSYAGSYTWV  | 10     | -          | +     | -        |
| neGFP+M17-L53  | 1-2    | 3-3  | 3  | 4  | IFGVVIYY         | 8      | 2-14  | 3  | SSYTSSTWV   | 10     | -          | +     | -        |
| neGFP+M17-L63# | 1-69   | 5-5  | 2  | 4  | VGPYSYGYDYSNYFDY | 17     | 2-14  | 3  | SSYTSSTLGWV | 12     |            |       |          |
| neGFP+M17-L66  | 3-7    | 4-11 | 2  | 4  | DHPQYFDY         | 9      | 1-44  | 3  | AAWDDSLNGWV | 11     | -          | -     | -        |
| neGFP+M17-L71  | 3-33   | 7-27 | 2  | 4  | ANWGFYFDY        | 10     | 1-44  | 3  | AAWDDSLNGWV | 11     | -          | -     | -        |
| neGFP+M17-L81  | 1-2    | 3-10 | 2  | 4  | GDYGGSYNDY       | 12     | 7-46  | 3  | LLSYSGAWV   | 9      | -          | -     | -        |
| neGFP+M17-L94# | 1-69   | 4-17 | 2  | 5  | HGDYWFDP         | 8      | 1-47  | 3  | AAWDDSLSGRV | 11     |            |       |          |
| neGFP+M17-L95# | 4-61   | 6-6  | 2  | 3  | AYSSSSGDAFDI     | 12     | 2-11  | 2  | CSYAGSYHVV  | 10     |            |       |          |

RF, reading frame: # antibody failed to be expressed

- non reactive; +, reactive

c, diffuse cytoplasmic staining; N, nuclear staining, F, cytoplasmic fibers; V, vesicles

**Table S22:** Repertoire and reactivity of antibodies from new emigrant B cells of Mouse #18 treated with 0.75 mg of LTV-1 PTPN22 inhibitor

| Ig         | HEAVY  |      |    |    |                     |        | LIGHT       |             |             |        | REACTIVITY |       |          |
|------------|--------|------|----|----|---------------------|--------|-------------|-------------|-------------|--------|------------|-------|----------|
|            | VH     | D    | RF | JH | CDR3(aa)            | Length | V $\lambda$ | J $\lambda$ | CDR3        | Length | Poly       | HEp-2 | Staining |
| neM18-K13  | 3-23   | 2-21 | 3  | 6  | DRRIVVVTAINYYYYYMDV | 19     | 1-39        | 1           | QQSYSTRT    | 8      | +          | +     | -        |
| neM18-K15  | 3-23   | 3-10 | 2  | 4  | EGLGDYFDY           | 9      | 1-5         | 1           | QQYNSYSRT   | 9      | -          | -     | -        |
| neM18-K19  | 1-3    | 7-27 | 1  | 4  | GELGPFDY            | 8      | 1-16        | 4           | QQYNSYPLT   | 9      | -          | +     | -        |
| neM18-K20  | 3-74   | /    | /  | 3  | GPRSFADFI           | 9      | 3-15        | 2           | QQYNNWPPYS  | 10     | -          | -     | -        |
| neM18-K21  | 3-23   | 5-12 | 2  | 4  | YSGYDFTYYFDY        | 12     | 1-5         | 1           | QQYNSYSRT   | 9      | -          | +     | -        |
| neM18-K25# | 3-23   | 3-22 | 2  | 4  | GVGSGYYYFDY         | 11     | 1-9         | 5           | QQLNSYLSIT  | 10     |            |       |          |
| neM18-K27# | 1-24   | 4-17 | 2  | 5  | DLLPSRYGDYNWFDP     | 15     | 2-10        | 1           | MQGTHWWT    | 8      |            |       |          |
| neM18-K29  | 3-30   | 7-27 | 3  | 4  | ERTGAFDY            | 8      | 3-20        | 4           | QQYATSLT    | 8      | -          | -     | -        |
| neM18-K30# | 4-59   | 2-2  | 2  | 2  | STTNAVYWYFDL        | 12     | 1-8         | 5           | QQYYSYPIT   | 9      |            |       |          |
| neM18-K33  | 4-34   | 6-13 | 2  | 4  | GHLKSSYSSSWYSY      | 14     | 2-24        | 1           | MQATQFPWT   | 9      | -          | -     | -        |
| neM18-K34  | 3-9    | 1-7  | 3  | 4  | DTRGTGTTYFDY        | 13     | 3-20        | 4           | QQYGSSLLT   | 9      | -          | -     | -        |
| neM18-K35  | 3-23   | 6-13 | 3  | 4  | APASHIAAAGRIYFDY    | 16     | 3-20        | 1           | QQYGSSPWT   | 9      | -          | -     | -        |
| neM18-K37  | 3-7    | /    | /  | 4  | TGPYYFDY            | 8      | 1-39        | 2           | QQSYSTPYT   | 9      | -          | +     | -        |
| neM18-K39  | 3-13   | 6-19 | 2  | 2  | QVRGWYFDL           | 9      | 3-15        | 3           | QQYNNWPFT   | 9      | -          | +     | -        |
| neM18-K44  | 3-48   | 1-26 | 2  | 4  | DLGSYYDY            | 8      | 1-17        | 1           | LQHQTYPRT   | 9      | -          | +     | -        |
| neM18-K45  | 4-34   | /    | /  | 2  | PLTADYWYFDL         | 11     | 3-20        | 1           | QQYGSSPV    | 8      | -          | -     | -        |
| neM18-K47# | 3-13   | /    | /  | 3  | AGTGAFDI            | 8      | 3-11        | 4           | QQRSTWPLT   | 9      |            |       |          |
|            | VH     | D    | RF | JH | CDR3(aa)            | Length | V $\lambda$ | J $\lambda$ | CDR3        | Length | Poly       | HEp-2 | Staining |
| neM18-L02  | 3-30-3 | 1-26 | 2  | 3  | DYQLGGSYYDAFDI      | 14     | 2-23        | 2           | CSYAGSSTLV  | 10     | -          | -     | -        |
| neM18-L03  | 4-38-2 | 2-21 | 2  | 4  | SPAYDCGGDCRFDY      | 14     | 3-25        | 3           | QSADSSGTWV  | 10     | -          | -     | -        |
| neM18-L04  | 4-30-4 | 6-13 | 3  | 5  | AGTAAAGTGWFDP       | 13     | 3-25        | 3           | QSADSSGTWV  | 10     | -          | -     | -        |
| neM18-L16  | 3-23   | 3-10 | 2  | 4  | DQGYYYGSGSYLDY      | 14     | 2-23        | 3           | CSYAGSRV    | 8      | -          | -     | -        |
| neM18-L17  | 4-39   | 7-27 | 2  | 3  | QANWGSSEAFDI        | 12     | 1-47        | 2           | AAWDDSLSGVV | 11     | -          | -     | -        |
| neM18-L18# | 1-18   | 4-17 | 2  | 5  | GYGDYWFDP           | 9      | 2-23        | 2           | CSYAGSSTHVV | 11     |            |       |          |
| neM18-L23  | 3-30   | /    | /  | 4  | EWVY                | 4      | 1-44        | 2           | AAWDDSLNGVV | 11     | -          | -     | -        |
| neM18-L28# | 3-30   | 7-27 | 3  | 4  | SVTGGLPMHY          | 10     | 5-37        | 3           | MIWASNAWV   | 9      |            |       |          |
| neM18-L31  | 3-15   | 3-16 | 2  | 5  | GVYYDYV             | 7      | 3-1         | 2           | QAWDSSTVV   | 9      | -          | -     | -        |
| neM18-L32  | 3-33   | 1-26 | 1  | 4  | NGRWELPTSRFNDFDY    | 16     | 3-21        | 3           | QVWDSSSDHWV | 11     | -          | +     | -        |
| neM18-L36  | 1-2    | /    | /  | 4  | SKRTGEGDY           | 9      | 3-21        | 2           | QVWDSSSDHPV | 11     | -          | -     | -        |
| neM18-L38  | 3-30   | 7-27 | 3  | 4  | DGAPTGDPILDY        | 12     | 2-14        | 2           | SSYTSSTLV   | 10     | -          | -     | -        |
| neM18-L43# | 3-23   | 1-26 | 3  | 1  | VIAEGATKYFQH        | 12     | 3-1         | 1           | QAWDSSTGV   | 9      |            |       |          |
| neM18-L46  | 1-2    | 7-27 | 2  | 3  | ISPNWGSAGFDI        | 12     | 2-23        | 2           | CSYAGSSTFVV | 11     | -          | -     | -        |
| neM18-L48# | 3-21   | 3-22 | 2  | 5  | DFSPLYDSSGYFDP      | 15     | 2-23        | 2           | CSYAGSSTYVV | 11     |            |       |          |
|            | VH     | D    | RF | JH | CDR3(aa)            | Length |             |             |             |        |            |       |          |
| neM18-K05# | 3-30   | 7-27 | 3  | 2  | RTGDHWYFDL          | 10     |             |             |             |        |            |       |          |
| neM18-K40  | 1-69   | 1-26 | 2  | 5  | AIRRYSGSYWYFDP      | 14     |             |             |             |        |            |       |          |

RF, reading frame: # antibody failed to be expressed

- non reactive; +, reactive

c, diffuse cytoplasmic staining; N, nuclear staining, F, cytoplasmic fibers; V, vesicles

**Table S23:** Repertoire and reactivity of antibodies from new emigrant B cells of Mouse #19 treated with 0.75 mg of LTV-1 PTPN22 inhibitor

| Ig         | HEAVY  |      |    |    |                           |        | LIGHT |    |              |        | REACTIVITY |       |          |
|------------|--------|------|----|----|---------------------------|--------|-------|----|--------------|--------|------------|-------|----------|
|            | VH     | D    | RF | JH | CDR3(aa)                  | Length | Vκ    | Jκ | CDR3(aa)     | Length | Poly       | HEp-2 | Staining |
| neM19-K50  | 1-69   | 6-6  | 3  | 4  | DDFRSIAARPSWGPFDY         | 17     | 3-20  | 2  | QQYGSSPYT    | 9      | +          | +     | -        |
| neM19-K53  | 4-34   | 4-4  | 3  | 5  | GSCGQTENWFDP              | 13     | 3-20  | 2  | QQYGSSPMYT   | 10     | -          | -     | -        |
| neM19-K55  | 3-11   | 2-2  | 2  | 6  | GGYCSSTSCFNYGMDV          | 16     | 3-20  | 2  | QQYGSSPPYT   | 10     | -          | -     | -        |
| neM19-K62  | 4-31   | 3-22 | 2  | 4  | VFWTPRYDSSGYFFDY          | 17     | 3-20  | 4  | QQYGSSSLT    | 8      | -          | -     | -        |
| neM19-K63  | 3-64   | 2-21 | 2  | 5  | DRAYCGGDCYSGTGGFDP        | 18     | 4-1   | 2  | QQYYSTPYT    | 9      | -          | -     | -        |
| neM19-K64  | 4-59   | 3-10 | 2  | 5  | DSVYYYGSGSYNEGSTLPKYNWFDP | 26     | 3-15  | 1  | QQYNNWPQT    | 9      | -          | +     | -        |
| neM19-K66# | 4-39   | 3-22 | 3  | 4  | LLFRLTMIVVVTGGIDY         | 17     | 3-20  | 3  | QQYGSSPFY    | 9      |            |       |          |
| neM19-K68  | 3-23   | 1-7  | 3  | 5  | EPPGTTSPSLTNWFDP          | 16     | 3-20  | 4  | QQYGSSPLT    | 9      | -          | -     | -        |
| neM19-K73  | 3-21   | 4-17 | 2  | 5  | DPFIYDRNDYGDYGWDFP        | 18     | 3-11  | 2  | QQRSTWPYT    | 9      | -          | +     | -        |
| neM19-K74  | 3-66   | 5-24 | 3  | 6  | VGVEATTGRCYGYMDV          | 17     | 3-15  | 4  | QQYNNWPPLT   | 10     | -          | +     | -        |
| neM19-K76# | 3-23   | 3-10 | 1  | 6  | CRASSGFELGDYGYMDV         | 18     | 1-17  | 1  | LQHNSYPWT    | 9      |            |       |          |
| neM19-K78  | 3-30-3 | 4-17 | 3  | 4  | GPVTNGYFFDY               | 11     | 3-20  | 1  | QQYGSSPQT    | 9      | -          | -     | -        |
| neM19-K85# | 3-21   | 3-22 | 2  | 4  | DQGYDSSGYGFDY             | 15     | 3-20  | 1  | QQYGSSPRT    | 9      |            |       |          |
| neM19-K87  | 4-59   | 1-26 | 3  | 4  | ARLGATFDY                 | 9      | 1-17  | 1  | LQHNSYPWT    | 9      | -          | -     | -        |
| neM19-K88  | 4-30-2 | 2-2  | 3  | 5  | AGGALIPAAIDWFDP           | 15     | 1-39  | 3  | QSYSTPFT     | 9      | -          | -     | -        |
| neM19-K90  | 3-7    | 2-15 | 2  | 3  | DHISGGSCYSAFDI            | 14     | 3-11  | 5  | QQRSNWPIT    | 9      | -          | +     | -        |
| neM19-K92  | 3-74   | 3-3  | 3  | 4  | GTIFGVVYSYD               | 11     | 3-15  | 2  | QQYNNWPYA    | 9      | +          | +     | -        |
| neM19-K93# | 1-69   | /    | /  | 4  | PLNRSGFDY                 | 9      | 3-15  | 1  | QQYNNWPRT    | 9      |            |       |          |
| neM19-K79  |        |      |    |    |                           |        | 1-5   | 1  | QQYNSYST     | 8      |            |       |          |
|            | VH     | D    | RF | JH | CDR3(aa)                  | Length | Vλ    | Jλ | CDR3(aa)     | Length | Poly       | HEp-2 | Staining |
| neM19-L56  | 4-61   | 3-22 | 2  | 4  | MEGSYYDSSGYPFDDY          | 17     | 1-51  | 3  | GTWSSLSAEV   | 11     | -          | -     | -        |
| neM19-L58  | 3-23   | 5-5  | 1  | 4  | VPATTWIQLWGLDY            | 14     | 2-14  | 1  | SSYSSSTLV    | 10     | -          | -     | -        |
| neM19-L60  | 3-11   | 4-23 | 2  | 3  | YGGNGGGLVGAFDI            | 14     | 2-14  | 3  | SSYSSSTLV    | 10     | -          | -     | -        |
| neM19-L67  | 1-3    | 3-10 | 2  | 5  | GLRVGYVSGSYNDWFDP         | 18     | 1-44  | 3  | AAWDDSLNGWV  | 11     | -          | -     | -        |
| neM19-L69  | 1-18   | 3-10 | 3  | 4  | DGREELNSRITMVRGPFDDY      | 19     | 2-14  | 3  | SSYSSSTWV    | 10     | -          | -     | -        |
| neM19-L77  | 3-21   | 2-15 | 2  | 5  | VPPLGYCSGGSCLNWFDP        | 18     | 5-37  | 3  | MIWPSNAWV    | 9      | -          | +     | -        |
| neM19-L80  | 3-66   | 1-26 | 2  | 4  | EIGDSGSYFFDY              | 12     | 1-47  | 3  | AWDDSLSGPS   | 10     | -          | -     | -        |
| neM19-L81# | 3-53   | 3-3  | 3  | 5  | FGVVKAGNWFDP              | 12     | 1-44  | 3  | AAWDDSLNGRV  | 11     |            |       |          |
| neM19-L83# | 3-33   | 1-20 | 2  | 6  | GGQMNLDNPGVLYYYGMDV       | 20     | 2-23  | 1  | CSYAGSSTNYV  | 11     |            |       |          |
| neM19-L84# | 4-31   | 3-22 | 2  | 4  | VDTYDSSGSRYFFDY           | 18     | 2-23  | 3  | AGSSTLVV     | 8      |            |       |          |
| neM19-L89  | 3-15   | 2-15 | 2  | 4  | VSPKINCSGGSCFITHFDY       | 19     | 1-40  | 1  | QSYDSSLGPPYV | 12     | -          | -     | -        |
| neM19-L94  | 3-15   | 3-10 | 2  | 5  | DLGDPRVEDWFDP             | 13     | 2-23  | 1  | CSYAGSSTYV   | 10     | -          | -     | -        |
| neM19-L95  | 3-74   | 2-22 | 2  | 4  | ALPYCSSTSCYQYFFDY         | 17     | 2-23  | 1  | AGSSTYV      | 7      | -          | +     | -        |
| neM19-L96  | 3-23   | 4-17 | 2  | 4  | DQVSYGDYRGGYFFDY          | 15     | 2-11  | 3  | CSYAGSYTV    | 9      | -          | -     | -        |
| neM19-L71  |        |      |    |    |                           |        | 1-47  | 2  | AAWDDSLSGHV  | 12     |            |       |          |
| neM19-L82  |        |      |    |    |                           |        | 1-44  | 3  | AAWDDSLNGWV  | 11     |            |       |          |
|            | VH     | D    | RF | JH | CDR3(aa)                  | Length |       |    |              |        |            |       |          |
| neM19-K52  | 3-7    | 5-5  | 3  | 4  | DQVDTAMVLDY               | 11     |       |    |              |        |            |       |          |
| neM19-H59  | 4-39   | 3-22 | 2  | 4  | LTYDSSGYFFDY              | 15     |       |    |              |        |            |       |          |
| neM19-H72  | 1-69   | 6-19 | 2  | 4  | DQDSYSSGWVGLDY            | 14     |       |    |              |        |            |       |          |

RF, reading frame: # antibody failed to be expressed

- non reactive; +, reactive

c, diffuse cytoplasmic staining; N, nuclear staining, F, cytoplasmic fibers; V, vesicles

**Table S24:** Repertoire and reactivity of antibodies from new emigrant B cells of Mouse #20 treated with 0.15 mg of LTV-1 PTPN22 inhibitor

| Ig         | HEAVY  |      |    |    |                        |        | LIGHT  |    |             |        | REACTIVITY |       |          |
|------------|--------|------|----|----|------------------------|--------|--------|----|-------------|--------|------------|-------|----------|
|            | VH     | D    | RF | JH | CDR3(aa)               | Length | Vk     | Jk | CDR3(aa)    | Length | Poly       | HEp-2 | Staining |
| neM20-K02  | 4-61   | 3-9  | 2  | 4  | AHYDILTGYWFDY          | 13     | Feb-30 | 1  | MQGTHWPPT   | 9      | +          | +     | -        |
| neM20-K05  | 3-30   | 3-22 | 2  | 4  | SGDSSGYFDY             | 11     | 3-15   | 4  | QQYNNWPLT   | 9      | -          | -     | -        |
| neM20-K06  | 3-30-3 | 6-13 | 2  | 4  | TAGYSSSWFDY            | 11     | 1-16   | 3  | QQYNSYPFT   | 9      | -          | -     | -        |
| neM20-K07  | 3-74   | 2-2  | 3  | 4  | DIVVVAATPGVSGFDY       | 17     | 1-27   | 3  | QKYNSAPFT   | 9      | -          | -     | -        |
| neM20-K10  | 1-8    | 1-26 | 1  | 3  | GPSVMMWELSSDAFDI       | 16     | 3-15   | 2  | QQYNNWPLYT  | 10     | -          | -     | -        |
| neM20-K11  | 4-59   | 6-19 | 2  | 5  | EWAGYSSGWSYDYNWFDP     | 17     | 1-17   | 1  | LQHNSYPRT   | 9      | -          | -     | -        |
| neM20-K13  | 4-31   | 7-27 | 3  | 2  | SAGDWGWYFDL            | 11     | 3-20   | 2  | QQYGSSPLYT  | 10     | -          | +     | -        |
| neM20-K14  | 4-34   | 4-11 | 2  | 4  | VGDYSNYPADY            | 11     | 3-11   | 4  | QQRSNWPLT   | 10     | -          | -     | -        |
| neM20-K22  | 3-23   | 6-13 | 2  | 4  | TYSSSWLYIDY            | 11     | 3-15   | 1  | QQYNNWPPVWT | 11     | +          | +     | -        |
| neM20-K23  | 3-21   | 6-13 | 2  | 5  | DLVGYSSSWNWFDP         | 14     | 1-NL1  | 2  | QQYYSTPYT   | 9      | +          | -     | -        |
| neM20-K27  | 3-23   | 3-22 | 2  | 4  | DLYYDSSGYPLGGGFDY      | 18     | 3-20   | 2  | QQYGSSPYT   | 9      | -          | -     | -        |
| neM20-K32  | 4-59   | 7-27 | 3  | 4  | GTKQELGKYFDY           | 13     | 3-15   | 1  | QQYNNWT     | 7      | -          | -     | -        |
| neM20-K34  | 3-23   | 6-6  | 1  | 4  | AGQLEPHYFDY            | 11     | 1-5    | 1  | QQYNSYSRT   | 9      | -          | -     | -        |
| neM20-K36  | 1-8    | 3-22 | 2  | 4  | GLSYDSDRGDYFDY         | 14     | 3-20   | 1  | QQYGSSPGT   | 9      | -          | -     | -        |
| neM20-K37  | 3-48   | 1-26 | 3  | 4  | NNGATTWRADY            | 11     | 3-20   | 5  | QQYGSSPIT   | 9      | -          | -     | -        |
| neM20-K39  | 3-23   | 2-15 | 2  | 3  | DWGDNCSSGSCYSNKVPDAFDI | 22     | 1-5    | 1  | QQYNSYRT    | 8      | -          | -     | -        |
| neM20-K41  | 3-66   | 4-17 | 2  | 4  | NEGYGDLYYFDY           | 13     | 3-11   | 3  | QQRSNCT     | 7      | -          | +     | -        |
| neM20-K45  | 3-72   | 1-26 | 3  | 5  | ERVAIGVGTARRGGQQYNWFDP | 24     | 3-11   | 3  | QQRSNWPT    | 8      | -          | +     | -        |
| neM20-K47# | 3-53   | 3-22 | 2  | 4  | QLLNYYDSSGYYYY         | 14     | 3-20   | 2  | QQYGSSPLVT  | 10     |            |       |          |
| neM20-K48  | 4-34   | /    | /  | 4  | HGSGTYQHFDY            | 11     | 3-11   | 2  | QQRSNWYT    | 8      | -          | -     | -        |
|            | VH     | D    | RF | JH | CDR3(aa)               | Length | VI     | JI | CDR3(aa)    | Length | Poly       | HEp-2 | Staining |
| neM20-L01  | 4-39   | 3-22 | 2  | 5  | HFFAIGDSSGYVGAYNWFDP   | 20     | 8-61   | 3  | VLYMGSGVWV  | 10     | -          | -     | -        |
| neM20-L08  | 1-2    | 6-13 | 3  | 3  | EPNLAAAGTKKNAFDI       | 16     | 2-14   | 1  | SSYTSSTLV   | 10     | -          | -     | -        |
| neM20-L12  | 4-39   | 1-26 | 3  | 5  | HFEVGAHRFDP            | 11     | 3-1    | 2  | QAWDSSTYVV  | 10     | -          | -     | -        |
| neM20-L15  | 3-23   | 6-13 | 3  | 6  | DGRGIAAAGTPYYGMDV      | 18     | 3-1    | 1  | QAWDSSTYVV  | 9      | -          | -     | -        |
| neM20-L16  | 3-48   | 7-27 | 3  | 3  | DLTGDRGNAFDI           | 12     | 3-21   | 3  | QVWDSSTDHWV | 11     | -          | -     | -        |
| neM20-L17  | 3-9    | 2-21 | 3  | 3  | DFGAIVVVDAFDI          | 14     | 2-11   | 2  | CSYAGSYTVV  | 10     | -          | -     | -        |
| neM20-L18  | 3-33   | 5-5  | 3  | 6  | GASDTAMVYYYYGMDV       | 17     | 2-14   | 1  | SSYTSSTLV   | 10     | -          | +     | -        |
| neM20-L19  | 3-73   | 6-19 | 3  | 3  | HAPPPIAVAGTVAFDI       | 16     | 1-44   | 3  | AAWDDSLNGWV | 11     | -          | -     | -        |
| neM20-L24  | 3-15   | 3-3  | 3  | 4  | EVWSGYTIFGVVIY         | 14     | 2-14   | 3  | SSYTSSTWV   | 10     | -          | +     | -        |
| neM20-L26  | 3-21   | 6-19 | 2  | 5  | TGYSSGWNWFDP           | 12     | 2-11   | 1  | CSYAGSYTVV  | 10     | -          | -     | -        |
| neM20-L28  | 4-61   | 3-10 | 2  | 5  | FGSSPHHSGSAVDWFDP      | 17     | 1-36   | 2  | AAWDDSLNGVW | 11     | -          | -     | -        |
| neM20-L29  | 3-23   | 3-22 | 2  | 3  | DRVDYYDSSGYPTDAFDI     | 19     | 1-44   | 2  | AAWDDSLNVV  | 10     | -          | +     | -        |
| neM20-L31  | 3-15   | /    | /  | 4  | DPPGKGTQSFYD           | 12     | 2-14   | 3  | SSYTSSTWV   | 10     | -          | -     | -        |
| neM20-L42  | 3-30   | 6-13 | 3  | 2  | AGGPLVRYAAAGYWYFDL     | 18     | 2-23   | 1  | CSYAGSSTYV  | 10     | +          | +     | -        |
| neM20-L43  | 4-34   | 3-10 | 3  | 5  | RGTMVRGVNVGWDFDP       | 15     | 2-11   | 3  | CSYAGSYTWV  | 10     | -          | -     | -        |
|            | VH     | D    | RF | JH | CDR3(aa)               | Length |        |    |             |        |            |       |          |
| neM20-H25  | 3-66   | 5-5  | 2  | 4  | DLGYSYGYTDY            | 11     |        |    |             |        |            |       |          |
| neM20-H30  | 3-49   | 3-9  | 2  | 4  | DQYDILTGFDY            | 11     |        |    |             |        |            |       |          |

RF, reading frame: # antibody failed to be expressed

- non reactive; +, reactive

**Table S25:** Repertoire and reactivity of antibodies from new emigrant B cells of Mouse #21 treated with 0.15 mg of LTV-1 PTPN22 inhibitor

| Ig         | HEAVY |      |    |    |     |                       |     | LIGHT  |       |    |             | REACTIVITY |      |       |          |
|------------|-------|------|----|----|-----|-----------------------|-----|--------|-------|----|-------------|------------|------|-------|----------|
|            | VH    | D    | RF | JH | (-) | CDR3(aa)              | (+) | Length | Vk    | Jk | CDR3(aa)    | Length     | Poly | Hep-2 | Staining |
| neM21-K6   | 3-30  | 3-10 | 3  | 3  | 1   | GGSSVRGVIIIGAFDI      | 1   | 15     | 2-30  | 4  | MQGTHWPLT   | 9          | +    | +     | -        |
| neM21-K8   | 3-30  | 2-2  | 2  | 3  | 2   | QGRYCSSTSCYADAFDI     | 1   | 17     | 1-5   | 2  | QQYNSYSYT   | 9          | -    | +     | -        |
| neM21-K10  | 1-69  | 6-13 | 2  | 4  | 1   | AGGNDSSWSFY           | 0   | 12     | 1-39  | 2  | QQSYSTLPYT  | 10         | -    | -     | -        |
| neM21-K14  | 3-48  | 5-24 | ?  | 3  | 2   | ATAPDLANAFDI          | 0   | 12     | 3-20  | 1  | QQYGSSPPWT  | 10         | -    | -     | -        |
| neM21-K15# | 1-24  | 3-22 | 3  | 3  | 1   | PITMIVVVITFGAFDI      | 1   | 16     | 3-20  | 1  | QQYGSSPVT   | 9          |      |       |          |
| neM21-K27# | 7-4   | 7-27 | ?  | 3  | 4   | DSRSRGEPDAFDI         | 2   | 13     | 1-8   | 2  | QQYYSYPYT   | 9          |      |       |          |
| neM21-K28  | 3-49  | 2-2  | 2  | 4  | 1   | TRSPYCSSTSCYPFDY      | 1   | 16     | 1D-33 | 3  | QQYDNLPPFT  | 9          | -    | -     | -        |
| neM21-K29  | 3-33  | 5-5  | 2? | 4  | 2   | DQNNRIQLWYGVFDY       | 2   | 15     | 1D-33 | 3  | QQYDNLPPFT  | 10         | -    | -     | -        |
| neM21-K30  | 4-34  | 3-22 | 2  | 4  | 3   | RGPDGEGSSGYYYFDY      | 1   | 17     | 1-12  | 2  | QQANSFPCT   | 9          | -    | -     | -        |
| neM21-K32  | 3-64  | 2-2  | 1  | 2  | 1   | VKGGRLQLLYSYWYFDL     | 1   | 17     | 3-20  | 1  | QQYGSSPRT   | 9          | -    | -     | -        |
| neM21-K33  | 3-15  | 5-5  | 2  | 5  | 2   | TTGGDSYGYSWFDP        | 0   | 14     | 3-11  | 4  | QQRSNWPLT   | 9          | -    | -     | -        |
| neM21-K40  | 4-38  | 3-3  | 3  | 3  | 2   | DLAIFGVVTPYYYYMDV     | 0   | 18     | 1-12  | 4  | QQANSFPLT   | 9          | +    | +     | -        |
| neM21-K41  | 4-61  | 1-14 | 2  | 4  | 4   | DDGDHRNYFDY           | 2   | 11     | 1-39  | 4  | QQSYSTPLT   | 9          | -    | -     | -        |
| neM21-K46  | 3-30  | 6-19 | 3  | 4  | 3   | DRIAVAGIGEYFDY        | 2   | 15     | 2-28  | 3  | MQALQTLFT   | 9          | -    | -     | -        |
| neM21-K26  |       |      |    |    |     |                       |     |        | 3-15  | 1  | QQYNNWPPWT  | 10         |      |       |          |
|            | VH    | D    | RF | JH | (-) | CDR3(aa)              | (+) | Length | VI    | Jl | CDR3(aa)    | Length     | Poly | Hep-2 | Staining |
| neM21-L4   | 4-31  | 6-13 | 2  | 1  | 1   | APKSSSSSWYFAEYFQH     | 1   | 17     | 6-57  | 2  | QSYDSSNVV   | 9          | +    | +     | -        |
| neM21-L23  | 3-15  | 7-27 | ?  | 3  | 1   | TTAPPGCAFDI           | 0   | 11     | 1-47  | 2  | AAWDDSLSGVV | 11         | -    | -     | -        |
| neM21-L24  | 3-23  | /    | /  | 3  | 4   | PWEAEVTDAFDI          | 2   | 12     | 1-44  | 2  | AAWDDSLNGVV | 11         | -    | +     | -        |
| neM21-L37  | 3-9   | 6-13 | 2  | 3  | 1   | RYSSSWYAFDI           | 1   | 11     | 1-47  | 2  | AAWDDSLSGPV | 11         | -    | +     | -        |
| neM21-L44  | 3-30  | 3-16 | ?  | 3  | 2   | DTSGAFDI              | 1   | 8      | 2-11  | 3  | CSYAGSYTWV  | 10         | -    | -     | -        |
| neM21-L45  | 1-58  | 6-13 | 3  | 4  | 1   | AAIGRTAAAGTDY         | 1   | 13     | 1-44  | 1  | AAWDDSLNV   | 9          | -    | -     | -        |
|            | VH    | D    | RF | JH | (-) | CDR3(aa)              | (+) | Length |       |    |             |            |      |       |          |
| neM21-H5   | 3-23  | 2-2  | 2  | 3  | 4   | DPREYCSSTSCYRVRDAFDI  | 3   | 20     |       |    |             |            |      |       |          |
| neM21-H48  | 3-72  | 6-6  | 2  | 6  | 3   | SYSSSDLSLAASDYYYYYMDV | 1   | 22     |       |    |             |            |      |       |          |

RF, reading frame: # antibody failed to be expressed

- non reactive; +, reactive

c, diffuse cytoplasmic staining; N, nuclear staining, F, cytoplasmic fibers; V, vesicles



**Table S26:** Repertoire and reactivity of antibodies from GFP-negative new emigrant B cells of Mouse #21

|                | HEAVY |      |    |    | LIGHT                 |        |      |    | REACTIVITY    |        |      |       |          |
|----------------|-------|------|----|----|-----------------------|--------|------|----|---------------|--------|------|-------|----------|
|                | VH    | D    | RF | JH | CDR3(aa)              | Length | Vk   | Jk | CDR3(aa)      | Length | Poly | HEp-2 | Staining |
| neGFP-M22-K2   | 3-30  | 4-23 | 2  | 3  | GASPYGGNSGAFDI        | 14     | 1-5  | 2  | QQYNSYST      | 8      | +    | -     | -        |
| neGFP-M22-K11  | 3-15  | 1-7  | 2  | 2  | GPNYPNQSRFYFDL        | 13     | 3-15 | 2  | QQYNNWPPYT    | 10     | +    | +     | -        |
| neGFP-M22-K12  | 1-69  | 2-15 | 2  | 4  | KTDGGGSSSHFDY         | 14     | 3-15 | 3  | QQYNNWPPSST   | 11     | -    | -     | -        |
| neGFP-M22-K13  | 3-30  | 3-22 | 3  | 3  | DPTSVVVMDSAFDI        | 14     | 3-15 | 1  | QQYNNWLWT     | 9      | +    | +     | -        |
| neGFP-M22-K14  | 3-23  | 6-19 | 1  | 1  | DTVGGWLGKIFYQH        | 13     | 1-39 | 4  | QQSYSTPLT     | 9      | +    | +     | -        |
| neGFP-M22-K17  | 4-39  | 1-26 | 2  | 4  | RSGSNRGLGYFDY         | 13     | 3-15 | 1  | QQYNNWPPWT    | 10     | +    | +     | -        |
| neGFP-M22-K18  | 3-7   | 4-23 | 3  | 2  | TNTVVGYYWYFDL         | 12     | 1-12 | 1  | QQANSFPWT     | 9      | +    | +     | -        |
| neGFP-M22-K19  | 3-23  | 2-21 | 2  | 4  | DRGGDYFDY             | 9      | 1-5  | 2  | QQYNSYSHT     | 9      | -    | -     | -        |
| neGFP-M22-K20  | 1-2   | 6-6  | 3  | 4  | PGSIAARVLDY           | 11     | 4-1  | 2  | QQYYSTPYT     | 9      | -    | +     | C        |
| neGFP-M22-K23  | 4-39  | 6-13 | 3  | 4  | HRGIAAAGDY            | 10     | 1-39 | 1  | QQSYSTPWT     | 9      | -    | +     | -        |
| neGFP-M22-K24  | 4-39  | 2-15 | 3  | 5  | HPIQDIVVVAANWFDP      | 17     | 3-11 | 3  | QQRNLVT       | 7      | -    | -     | -        |
| neGFP-M22-K25# | 4-61  | 3-22 | 2  | 6  | DRYYDSSGYSDYYGMDV     | 18     | 3-20 | 2  | QQYGSSPYT     | 9      |      |       |          |
| neGFP-M22-K29  | 3-23  | 6-19 | 3  | 4  | DPGGSIAVAGDY          | 12     | 3-11 | 4  | QQRSNWLT      | 8      | -    | -     | -        |
| neGFP-M22-K30  | 4-4   | 4-17 | 2  | 6  | VGWEDDYDQGGRYYYGMDV   | 21     | 2-28 | 4  | MQALQTLT      | 8      | -    | -     | -        |
| neGFP-M22-K33  | 4-31  | 4-17 | 3  | 2  | GAMTTVTGGPAAGYFDL     | 18     | 1-39 | 1  | QQSYSTPGP     | 9      | -    | +     | -        |
| neGFP-M22-K34  | 1-18  | 5-24 | 2  | 4  | AGRRDGYNYFDY          | 13     | 3-15 | 2  | QQYNNWPPYT    | 9      | -    | +     | -        |
| neGFP-M22-K39  | 3-64  | 3-9  | 2  | 5  | DPHYDILTGYSHNWFDP     | 17     | 2-28 | 2  | MQALQTPYT     | 9      | -    | -     | -        |
| neGFP-M22-K40# | 3-74  | 5-24 | 3  | 6  | DRVEMATYYYYYGMVDV     | 17     | 2-28 | 1  | MQALQTPRT     | 9      |      |       |          |
| neGFP-M22-K42  | 3-33  | 3-22 | 2  | 4  | DAHYYDSSGYPPAYYFDY    | 18     | 1-5  | 1  | QQYNSYPWT     | 9      | +    | +     | -        |
| neGFP-M22-K45  | 4-61  | 4-23 | 3  | 4  | EGVVTKFPDY            | 10     | 1-17 | 1  | LQHNSYPWT     | 9      | -    | -     | -        |
| neGFP-M22-K46  | 4-61  | 2-2  | 2  | 4  | WGVNSCSSTSCYSSRLYYFDY | 22     | 1-17 | 3  | LQHNSYLFT     | 9      | -    | +     | -        |
| neGFP-M22-K47  | 3-11  | /    | /  | 4  | DTGHTGDY              | 8      | 1-39 | 2  | QQSYSTPRT     | 9      | -    | +     | -        |
| neGFP-M22-K48  | 3-30  | 2-2  | 2  | 3  | GYCSSTSCYRGAFDI       | 15     | 3-20 | 3  | QQYGSSPFT     | 9      | -    | +     | -        |
|                | VH    | D    | RF | JH | CDR3(aa)              | Length | Vk   | Jk | CDR3(aa)      | Length | Poly | HEp-2 | Staining |
| neGFP-M22-L1   | 3-33  | 2-8  | 2  | 4  | GNVGYCTNGVCSSISFDY    | 18     | 1-51 | 1  | GTWDSLSLAHYV  | 12     | -    | +     | -        |
| neGFP-M22-L3   | 4-61  | 5-5  | 2  | 5  | EFKRGYSYGYWWFDP       | 15     | 1-51 | 3  | GTWDSLSL SAGV | 11     | +    | +     | N        |
| neGFP-M22-L4   | 3-23  | 3-3  | 3  | 4  | STIFGWITPFDY          | 13     | 2-11 | 3  | CSYAGSVV      | 8      | -    | -     | -        |
| neGFP-M22-L5   | 3-11  | 4-4  | 3  | 5  | VGGLRPTVTTGYNWFDP     | 17     | 2-14 | 3  | SSYTSSSTWV    | 10     | -    | -     | -        |
| neGFP-M22-L6   | 3-30  | 4-17 | 2  | 4  | PKADYGDYTPAQYFDY      | 17     | 2-11 | 2  | CSYAGSYHV     | 10     | -    | -     | -        |
| neGFP-M22-L8   | 3-9   | /    | /  | 6  | VTHPLNYYYGMVDV        | 13     | 1-47 | 3  | AAWDDSLSGPV   | 11     | -    | -     | -        |
| neGFP-M22-L9   | 3-30  | 3-10 | 1  | 4  | DRGRFGEGYFDY          | 12     | 1-51 | 3  | GTWDSLSL SAWV | 11     | -    | -     | -        |
| neGFP-M22-L10  | 3-30  | 3-3  | 2  | 4  | DSFPRFWSGYCSFDY       | 15     | 1-44 | 1  | AAWDDSHYV     | 9      | -    | +     | -        |
| neGFP-M22-L16  | 3-74  | 2-2  | 1  | 6  | DRVVPHRGTQLNGMDV      | 17     | 2-11 | 2  | CSYAGSYTLV    | 10     | -    | -     | -        |
| neGFP-M22-L22  | 3-11  | 3-9  | 2  | 5  | DRTPTYDILTQQLNWFDP    | 18     | 2-8  | 2  | SSYAGSNNV     | 10     | -    | -     | -        |
| neGFP-M22-L27  | 3-23  | 2-2  | 2  | 4  | SLNCSSTSWYLPRVGFYD    | 18     | 2-14 | 3  | SSYTSSSIWV    | 10     | -    | -     | -        |
| neGFP-M22-L38  | 3-21  | 6-6  | 3  | 4  | VVAARWDIYYFDY         | 13     | 2-14 | 2  | SSYTSSSIPV    | 11     | -    | -     | -        |
| neGFP-M22-L43  | 3-33  | 4-4  | 2  | 5  | GSEKNDYSNYMNVFDP      | 16     | 1-51 | 3  | GTWDSLSL SAGV | 11     | -    | -     | -        |

RF, reading frame: # antibody failed to be expressed

- non reactive; +, reactive

c, diffuse cytoplasmic staining; N, nuclear staining, F, cytoplasmic fibers; V, vesicles

**Table S27:** Repertoire and reactivity of antibodies from GFP-positive new emigrant B cells expressing PTPN22 shRNA from Mouse #21

| Ig             | HEAVY |      |    |    |                         |        | LIGHT |    |               |        | REACTIVITY |       |          |
|----------------|-------|------|----|----|-------------------------|--------|-------|----|---------------|--------|------------|-------|----------|
|                | VH    | D    | RF | JH | CDR3(aa)                | Length | Vk    | Jk | CDR3(aa)      | Length | Poly       | HEp-2 | Staining |
| neGFP+M22-K49  | 3-15  | 6-19 | 3  | 4  | DRYVAVAGTVDY            | 12     | 3-11  | 3  | QQRSNLFT      | 8      | -          | -     | -        |
| neGFP+M22-K58  | 4-4   | 6-6  | 2  | 4  | AGPYSSSYFDY             | 12     | 1-17  | 1  | LQHNSYPWT     | 9      | -          | +     | -        |
| neGFP+M22-K65# | 1-46  | 2-15 | 1  | 4  | TLRGWCPDY               | 9      | 1-16  | 2  | QQYNSYPHT     | 9      |            |       |          |
| neGFP+M22-K67# | 3-48  | 4-4  | 2  | 4  | ADDYSNYFDY              | 10     | 1-33  | 4  | QQYDNLPLT     | 9      |            |       |          |
| neGFP+M22-K68# | 3-30  | 2-8  | 2  | 6  | DGANGARLGHHYYYYGMDV     | 20     | 3-11  | 5  | QQRSNWPPIT    | 10     |            |       |          |
| neGFP+M22-K71  | 3-11  | 2-2  | 2  | 6  | DHTARGACSTSCYIYYGMDV    | 22     | 1-17  | 2  | LQHNSYPYT     | 9      | -          | +     | -        |
| neGFP+M22-K74# | 3-33  | 6-19 | 1  | 3  | DYFFGQWLAAGDAFDI        | 16     | 2-30  | 3  | MQGTHWPRVT    | 10     |            |       |          |
| neGFP+M22-K77  | 3-7   | 6-13 | 3  | 4  | GVAAGIFGY               | 9      | 3-20  | 4  | QQYGSSPLT     | 9      | +          | +     | -        |
| neGFP+M22-K86  | 4-61  | 2-21 | 3  | 1  | TYFVVVMEAEYFQH          | 14     | 3-11  | 4  | QQRRTWSLT     | 9      | -          | -     | -        |
| neGFP+M22-K87  | 3-30  | 2-15 | 3  | 4  | DGGRGVVAATLLYFDY        | 16     | 1-8   | 4  | QQYYSFPLT     | 9      | -          | +     | -        |
| neGFP+M22-K90  | 3-21  | 6-6  | 2  | 6  | DLSEYSSSSFFRYYGMDV      | 19     | 1-39  | 3  | QQSYSTPQT     | 9      | -          | +     | -        |
|                | VH    | D    | RF | JH | CDR3(aa)                | Length | Vλ    | Jλ | CDR3(aa)      | Length | Poly       | HEp-2 | Staining |
| neGFP+M22-L51  | 3-30  | 6-19 | 2  | 4  | DGRYSSGWSYFDY           | 13     | 1-40  | 2  | QSYDSSLGSGV   | 11     | -          | +     | -        |
| neGFP+M22-L52# | 3-23  | 3-9  | 2  | 6  | EPPPSYDILTGSNYYYYGMDV   | 21     | 1-44  | 3  | AAWDDSLNGWV   | 11     |            |       |          |
| neGFP+M22-L60  | 4-61  | 2-2  | 2  | 5  | VSGCSSTSCFGWFDP         | 16     | 2-23  | 3  | RSYAGSSTWV    | 10     | -          | -     | -        |
| neGFP+M22-L62  | 3-23  | 3-22 | 2  | 3  | VDTETDDSSGYAFDI         | 15     | 1-47  | 2  | AAWDDSLSGVV   | 11     | -          | -     | -        |
| neGFP+M22-L64  | 3-23  | 2-15 | 2  | 3  | DRCSGGSCPDAFDI          | 14     | 2-23  | 1  | CSYAGSSTLYV   | 11     | -          | -     | -        |
| neGFP+M22-L69  | 4-59  | 4-17 | 2  | 2  | DRNGDYPWYFDL            | 12     | 1-40  | 2  | QSYDSSLSVV    | 10     | -          | -     | -        |
| neGFP+M22-L75  | 1-18  | 4-23 | 3  | 4  | GAVVTPGYFDY             | 11     | 2-14  | 1  | SSYTSSKV      | 8      | -          | -     | -        |
| neGFP+M22-L79  | 3-30  | 2-21 | 2  | 4  | SYCGGDYFDY              | 11     | 1-40  | 1  | QSYDSSLGSGYV  | 11     | -          | -     | -        |
| neGFP+M22-L81# | 1-69  | 5-24 | 2  | 4  | PSGDGYNLEY              | 11     | 2-14  | 3  | SSYTSSSTWV    | 10     |            |       |          |
| neGFP+M22-L82  | 3-20  | 3-22 | 2  | 4  | VQSNPLYYYDSSGYYYDY      | 18     | 2-14  | 1  | SSYTSSNYV     | 9      | -          | -     | -        |
| neGFP+M22-L83  | 1-81  | 2-2  | 2  | 3  | VEPPTRVAHCSSTSCYILGAFDI | 23     | 2-14  | 1  | SSYTSSSYV     | 9      | -          | -     | -        |
| neGFP+M22-L84  | 4-34  | 4-17 | 2  | 3  | GLYGDYVDAFDI            | 12     | 1-44  | 3  | AAWDDSLNGWV   | 11     | -          | -     | -        |
| neGFP+M22-L85  | 4-39  | 3-10 | 2  | 6  | HGVHLPPYGGSGSYYYGMDV    | 21     | 1-40  | 3  | QSYDSSLGSGWV  | 11     | -          | -     | -        |
| neGFP+M22-L89  | 1-3   | 6-13 | 3  | 4  | GKIAAAGFDY              | 10     | 3-21  | 2  | QVWDSSSDHPV   | 11     | -          | -     | -        |
| neGFP+M22-L91  | 1-46  | 4-4  | 3  | 4  | TTTVIYFDY               | 10     | 2-11  | 1  | CSYAGSYTYV    | 10     | -          | -     | -        |
| neGFP+M22-L96  | 3-48  | 4-17 | 2  | 4  | GKYQEPYGYFPTRGFDY       | 19     | 1-51  | 1  | GTWDDSSL SAYV | 11     | -          | -     | -        |

RF, reading frame: # antibody failed to be expressed

- non reactive; +, reactive

c, diffuse cytoplasmic staining; N, nuclear staining, F, cytoplasmic fibers; V, vesicles

**Table S28:** Repertoire and reactivity of antibodies from GFP-negative new emigrant B cells of Mouse #22

| Ig             | HEAVY |      |    |    |                          |        | LIGHT |    |              |        | REACTIVITY |       |          |
|----------------|-------|------|----|----|--------------------------|--------|-------|----|--------------|--------|------------|-------|----------|
|                | VH    | D    | RF | JH | CDR3(aa)                 | Length | Vκ    | Jκ | CDR3(aa)     | Length | Poly       | HEp-2 | Staining |
| neGFP-M23-K01  | 3-23  | 1-26 | 3  | 5  | RKGATGDWDFDP             | 11     | 1-8   | 2  | QQYYSYPYT    | 9      | +          | +     | -        |
| neGFP-M23-K02# | 4-34  | 3-22 | 2  | 4  | SDDSSGYRKAFDY            | 15     | 3-11  | 1  | QQRSTWPPWT   | 10     |            |       |          |
| neGFP-M23-K09  | 3-15  | 2-15 | 2  | 6  | APSGYCSGGSCYYYGMDV       | 19     | 2-28  | 2  | MQALQTPYT    | 9      | -          | +     | -        |
| neGFP-M23-K16# | 1-2   | 3-10 | 2  | 6  | LYYYGSGSYSQYYYGMDV       | 19     | 3-11  | 4  | QQRSTWPPWT   | 10     |            |       |          |
| neGFP-M23-H25  | 4-59  | 2-8  | 1  | 2  | STGYWYFDL                | 10     | 4-1   | 1  | QQYDTPRA     | 9      | -          | -     | -        |
| neGFP-M23-K29# | 1-2   | 2-2  | 3  | 4  | ESDIVVPAASRASRYDY        | 19     | 3-15  | 2  | QQYNNWPSYT   | 10     |            |       |          |
| neGFP-M23-K35  | 3-33  | 3-22 | 2  | 4  | VSRDYDSSGYGPFADY         | 18     | 1-12  | 4  | QQANSFPLT    | 9      | -          | +     | -        |
| neGFP-M23-K40# | 3-53  | 5-12 | 3  | 5  | DSGGVATWGQGLTVTSSARTSQDP | 25     | 1-8   | 1  | QQYYSYPRT    | 9      |            |       |          |
| neGFP-M23-K41  | 3-30  | 3-10 | 3  | 5  | DRRRITMVRGVTNWDFDP       | 17     | 2-28  | 1  | MQALQTPWT    | 9      | +          | +     | -        |
| neGFP-M23-K43# | 3-9   | 3-10 | 2  | 2  | DMRMHYGSGGYWYFDL         | 16     | 3-15  | 2  | QQYNNWPPYT   | 10     |            |       |          |
| neGFP-M23-K44# | 1-2   | 6-6  | 1  | 4  | ALIWLQATSPLDY            | 13     | 1-5   | 1  | QQYNSYSQWT   | 10     |            |       |          |
| neGFP-M23-K47# | 4-34  | 3-9  | 2  | 5  | EREPPYDISNWDFDP          | 14     | 3-11  | 4  | QQRSTWPLT    | 9      |            |       |          |
| neGFP-M23-K22  |       |      |    |    |                          |        | 1-39  | 2  | QQSYSTPYT    | 9      |            |       |          |
|                | VH    | D    | RF | JH | CDR3(aa)                 | Length | Vλ    | Jλ | CDR3(aa)     | Length | Poly       | HEp-2 | Staining |
| neGFP-M23-L03  | 3-9   | 3-10 | 2  | 3  | GRVYDILTIGSGSLYAFDI      | 19     | 2-14  | 2  | SSYSSSTLV    | 10     | -          | -     | -        |
| neGFP-M23-L04  | 3-30  | 2-15 | 2  | 5  | PYCSCGGSCVSGSRALYNWDFDP  | 22     | 2-14  | 1  | SSYSSSTLV    | 11     | -          | -     | -        |
| neGFP-M23-L05  | 1-2   | 2-2  | 3  | 6  | EAVVPSRGMNDV             | 12     | 2-11  | 2  | CSYAGSYTVV   | 10     | -          | -     | -        |
| neGFP-M23-L06# | 1-18  | 5-12 | 2  | 4  | DPGSGYDNDY               | 11     | 3-25  | 3  | QSADSSGTWV   | 10     |            |       |          |
| neGFP-M23-L11  | 3-9   | /    | /  | 4  | DRQMPQIGAQGFYD           | 15     | 3-1   | 2  | QAWDSSTVV    | 9      | -          | +     | -        |
| neGFP-M23-L12# | 3-23  | 6-13 | 2  | 6  | HSGYSSSWPNVMDV           | 14     | 3-21  | 2  | QVWDSSTDHVV  | 11     |            |       |          |
| neGFP-M23-L13  | 3-33  | 6-13 | 2  | 3  | GTRQDSSWWGHAFDI          | 16     | 1-51  | 1  | GTWDSLSAYV   | 11     | -          | -     | -        |
| neGFP-M23-L14# | 1-69  | 6-13 | 2  | 5  | EGGVSSSWPYNWDFDP         | 16     | 1-40  | 3  | QSYDSSLGWV   | 11     |            |       |          |
| neGFP-M23-L18# | 3-9   | 6-13 | 3  | 4  | DGAAAGLRY                | 9      | 1-44  | 3  | AAWDDSLNGWV  | 11     |            |       |          |
| neGFP-M23-L19# | 3-33  | 6-6  | 1  | 6  | DRTQQLVPYYYGMDV          | 16     | 2-8   | 2  | SSYAGSNNLV   | 10     |            |       |          |
| neGFP-M23-L20  | 1-2   | 3-10 | 1  | 4  | DLLRFGLWDY               | 11     | 1-47  | 1  | AAWDDSLSGPV  | 11     | -          | +     | C        |
| neGFP-M23-L21  | 3-9   | 2-15 | 2  | 4  | DVTNGRDCSGSCYSFYD        | 18     | 1-44  | 2  | AAWDDSLNGVV  | 11     | -          | -     | -        |
| neGFP-M23-L23  | 3-48  | 2-2  | 2  | 2  | DTHCSSTSCYSDFYD          | 17     | 2-23  | 3  | CSYAGSST     | 8      | -          | -     | -        |
| neGFP-M23-L24  | 1-2   | 2-2  | 3  | 5  | EGDIVVPAAHGWDFDP         | 16     | 2-23  | 1  | AGSSTYNYV    | 9      | -          | -     | -        |
| neGFP-M23-L25  | 4-59  | 2-8  | 1  | 2  | STGYWYFDL                | 10     | 3-1   | 2  | QAWDSSTVV    | 9      | -          | -     | -        |
| neGFP-M23-L26  | 4-34  | 6-13 | 2  | 1  | PGYSSWYFQH               | 12     | 2-14  | 3  | SSYSSSTL     | 9      | +          | +     | -        |
| neGFP-M23-L27  | 3-11  | 3-16 | 3  | 5  | GTLETYDLYPRLGRGLYNWDFDP  | 22     | 1-47  | 3  | AAWDDSLSGWV  | 11     | +          | +     | -        |
| neGFP-M23-L28  | 3-33  | 3-10 | 2  | 4  | YYYGSGSYLGLRALHFDY       | 18     | 2-11  | 2  | CSYAGSYTLV   | 11     | -          | +     | -        |
| neGFP-M23-L30  | 3-21  | 2-21 | 3  | 6  | DRVVVVIAEGLGYYYGMDV      | 20     | 2-14  | 3  | SSYSSSRV     | 9      | -          | -     | -        |
| neGFP-M23-L31  | 3-30  | 3-10 | 1  | 3  | GLKFGAVRSAFDI            | 13     | 1-51  | 3  | GTWDSLSSTNVV | 12     | +          | +     | -        |
| neGFP-M23-L39# | 4-34  | 6-13 | 2  | 3  | GCRNSSSWYVEKSDAFDI       | 18     | 1-44  | 2  | AAWDDSLNGHVV | 12     |            |       |          |
| neGFP-M23-L46  | 3-23  | 3-22 | 2  | 6  | PPYYDSSGYLYGMDV          | 18     | 1-40  | 2  | QSYDSSLGVV   | 11     | -          | -     | -        |
| neGFP-M23-L48# | 3-33  | 5-5  | 2  | 3  | GRAWHSYGDDAFDI           | 14     | 1-51  | 1  | GTWDSLSAYV   | 11     |            |       |          |
| neGFP-M23-L10  |       |      |    |    |                          |        | 1-40  | 3  | QSYDSSLGWV   | 11     |            |       |          |
| neGFP-M23-L38  |       |      |    |    |                          |        | 3-1   | 2  | QAWDSSTVV    | 9      |            |       |          |
|                | VH    | D    | RF | JH | CDR3(aa)                 | Length |       |    |              |        |            |       |          |
| neGFP-M23-L08  | 7-4   | 2-2  | 1  | 5  | GSEYQLLRGWDFDP           | 13     |       |    |              |        |            |       |          |
| neGFP-M23-H17  | 3-30  | 1-26 | 3  | 6  | VLPVGAGHYYYGMDV          | 15     |       |    |              |        |            |       |          |
| neGFP-M23-H29  | 1-2   | 2-2  | 3  | 4  | ESDIVVPAASRASRYDY        | 19     |       |    |              |        |            |       |          |
| neGFP-M23-H34  | 5-51  | 1-7  | 2  | 4  | LWGLYNWNYFDY             | 12     |       |    |              |        |            |       |          |
| neGFP-M23-H35  | 3-33  | 3-22 | 2  | 4  | VSRDYDSSGYGPFADY         | 18     |       |    |              |        |            |       |          |
| neGFP-M23-H41  | 3-30  | 3-10 | 3  | 5  | DRRRITMVRGVTNWDFDP       | 17     |       |    |              |        |            |       |          |
| neGFP-M23-H43  | 3-9   | 3-10 | 2  | 2  | DMRMHYGSGGYWYFDL         | 16     |       |    |              |        |            |       |          |
| neGFP-M23-H44  | 1-2   | 6-6  | 1  | 4  | ALIWLQATSPLDY            | 13     |       |    |              |        |            |       |          |
| neGFP-M23-H47  | 4-34  | 3-9  | 2  | 5  | EREPPYDISNWDFDP          | 14     |       |    |              |        |            |       |          |

RF, reading frame: # antibody failed to be expressed

- non reactive; +, reactive

c, diffuse cytoplasmic staining; N, nuclear staining, F, cytoplasmic fibers; V, vesicles

**Table S29:** Repertoire and reactivity of antibodies from GFP-positive new emigrant B cells expressing PTPN22 shRNA from Mouse #22

| Ig             | HEAVY  |      |    |    |                      |        | LIGHT |    |              |        | REACTIVITY |       |          |
|----------------|--------|------|----|----|----------------------|--------|-------|----|--------------|--------|------------|-------|----------|
|                | VH     | D    | RF | JH | CDR3(aa)             | Length | Vκ    | Jκ | CDR3(aa)     | Length | Poly       | HEp-2 | Staining |
| neGFP+M23-K49  | 3-30-3 | 3-10 | 2  | 3  | GAYYGSYSYKDAFDI      | 16     | 1-17  | 4  | LQHNSYPLT    | 9      | -          | +     | -        |
| neGFP+M23-K52  | 3-11   | 6-6  | 2  | 4  | AGSDSSSAVFDY         | 13     | 1-33  | 2  | QQYDNLP      | 7      | -          | -     | -        |
| neGFP+M23-K54# | 1-18   | 1-26 | 2  | 6  | DPRVPGGSYYYYGMDV     | 16     | 1-16  | 4  | QQYNSYPLT    | 9      |            |       |          |
| neGFP+M23-K55  | 3-21   | /    | /  | 4  | EPAPLGVAGGY          | 11     | 1-17  | 3  | LQHNSYPFT    | 9      | -          | +     | -        |
| neGFP+M23-K56  | 3-11   | 3-3  | 2  | 3  | LPFLDLFWSGYYADAFDI   | 18     | 3-15  | 4  | QQYNNWPLT    | 9      | -          | +     | -        |
| neGFP+M23-K63  | 3-7    | /    | /  | 4  | VQDNRAPDFDY          | 11     | 1-17  | 1  | LQHNSYPWT    | 9      | -          | +     | -        |
| neGFP+M23-H65  | 1-2    | 6-13 | 2  | 4  | AGGGSSSWYFDY         | 13     | 3-20  | 5  | QQYGSSPIT    | 9      | -          | -     | -        |
| neGFP+M23-K68  | 3-7    | 6-13 | 2  | 4  | SKYSSSWYGDY          | 11     | 3-11  | 1  | QQRSNWW      | 7      | -          | +     | -        |
| neGFP+M23-K72  | 4-34   | 6-13 | 3  | 6  | GNRLIAAAGSYYYYGMDV   | 18     | 1-39  | 4  | QQSYSTLT     | 8      | -          | -     | -        |
| neGFP+M23-K79  | 3-23   | 3-10 | 2  | 4  | VTNYGSGSYNGFDY       | 15     | 1-39  | 1  | QQSYSTWT     | 8      | -          | -     | -        |
| neGFP+M23-H80  | 3-30-3 | 6-13 | 3  | 1  | DLSDSIAAAGVGYFQH     | 16     | 3-20  | 3  | QQYGSSPT     | 8      | -          | -     | -        |
| neGFP+M23-K83  | 3-74   | 4-4  | 3  | 4  | LLTVTSYFDY           | 10     | 1-13  | 5  | QQLNSYPPIT   | 10     | -          | -     | -        |
| neGFP+M23-K84  | 4-59   | 6-13 | 2  | 4  | GPYSSSWFSIDY         | 12     | 1-39  | 2  | QQSYSTPYT    | 9      | -          | -     | -        |
| neGFP+M23-K85  | 3-15   | 1-26 | 2  | 6  | DRVGGSSYYYYGMDV      | 15     | 1-39  | 5  | QQSYSTPPIT   | 10     | -          | -     | -        |
| neGFP+M23-K89  | 1-2    | 1-26 | 1  | 4  | GQWELDY              | 7      | 3-20  | 4  | QQYGSSLT     | 8      | -          | -     | -        |
| neGFP+M23-K92  | 3-33   | 7-27 | 2  | 4  | DRNWGFDY             | 8      | 3-20  | 2  | QQYGSSPYT    | 9      | -          | -     | -        |
| neGFP+M23-K94# | 1-2    | /    | /  | 4  | GLLGLFDY             | 8      | 2-30  | 2  | MQGTHWPYT    | 9      |            |       |          |
| neGFP+M23-K95# | 4-39   | 3-10 | 1  | 4  | LGFGLSHDY            | 10     | 1-39  | 5  | QQSYSTPPIT   | 10     |            |       |          |
| neGFP+M23-K51  |        |      |    |    |                      |        | 3-11  | 4  | QQRSNWPPVT   | 10     |            |       |          |
| neGFP+M23-K75  |        |      |    |    |                      |        | 2-30  | 1  | MQGTHWPPT    | 9      |            |       |          |
|                | VH     | D    | RF | JH | CDR3(aa)             | Length | Vλ    | Jλ | CDR3(aa)     | Length | Poly       | HEp-2 | Staining |
| neGFP+M23-L50  | 3-33   | 5-5  | 2  | 2  | DSMGQSTGYSYGYPYWYFDL | 20     | 1-40  | 2  | QSYDSSLGHVV  | 12     | -          | -     | -        |
| neGFP+M23-L53  | 3-30   | 6-19 | 2  | 3  | CYSSGWDDAFDI         | 12     | 1-47  | 3  | AWDDSLSGWV   | 10     | -          | -     | -        |
| neGFP+M23-L60# | 7-4-1  | 3-10 | 3  | 5  | PSITMVRGVIIFNWFDP    | 17     | 1-40  | 2  | QSYDSSLSGDVV | 12     |            |       |          |
| neGFP+M23-L61  | 1-2    | 6-19 | 3  | 4  | SNFQYSYGY            | 10     | 2-8   | 1  | SSYAGSNNYV   | 10     | +          | +     | -        |
| neGFP+M23-L62  | 1-2    | 6-13 | 2  | 4  | DRVKDGGSSWPDY        | 13     | 2-14  | 2  | SSYTSSTLV    | 10     | -          | -     | -        |
| neGFP+M23-L64  | 3-7    | 1-7  | 3  | 5  | ETGITGTTGWFDP        | 13     | 3-1   | 1  | QAWDSSTAYV   | 10     | -          | -     | -        |
| neGFP+M23-L66  | 4-59   | 6-13 | 1  | 6  | VLSGGQQHPSYYYYGMDV   | 19     | 1-51  | 1  | GTWDSSLSARYV | 12     | -          | -     | -        |
| neGFP+M23-L70  | 3-48   | /    | /  | 4  | GMLFLGWYFDY          | 12     | 2-11  | 2  | CSYAGSYTLV   | 10     | -          | -     | -        |
| neGFP+M23-L73  | 3-53   | 3-22 | 2  | 3  | SSGYRHDAFDI          | 11     | 2-23  | 2  | CSYAGSSTHV   | 11     | -          | -     | -        |
| neGFP+M23-L77  | 3-11   | 2-15 | 2  | 2  | VGSWVDYWYFDL         | 12     | 1-44  | 3  | AAWDDSLNGWV  | 11     | -          | -     | -        |
| neGFP+M23-L81# | 3-15   | 7-27 | 2  | 4  | GPPNWGEQRQDDY        | 13     | 2-14  | 2  | SSYTSSTTV    | 10     |            |       |          |
| neGFP+M23-L82  | 3-9    | /    | /  | 3  | DSPASGLAFDI          | 11     | 2-14  | 1  | SSYTSSTTYV   | 10     | -          | -     | -        |
| neGFP+M23-L96  | 3-48   | 3-3  | 2  | 4  | GASGSGQIGFDY         | 13     | 6-57  | 3  | QSYDSSNHVV   | 10     | -          | -     | -        |
|                | VH     | D    | RF | JH | CDR3(aa)             | Length |       |    |              |        |            |       |          |
| neGFP+M23-H58  | 4-34   | 3-22 | 2  | 3  | HYYYDSSGYARLNAFDI    | 18     |       |    |              |        |            |       |          |
| neGFP+M23-H59  | 4-34   | 6-19 | 3  | 4  | VSLHIAVAGTGPFYD      | 15     |       |    |              |        |            |       |          |
| neGFP+M23-K69  | 1-2    | 7-27 | 3  | 3  | EGTGDPDAFDI          | 11     |       |    |              |        |            |       |          |
| neGFP+M23-H71  | 4-34   | 2-8  | 2  | 3  | GLVVRCTNGVCYNHAFDI   | 18     |       |    |              |        |            |       |          |
| neGFP+M23-H74  | 3-30-3 | 3-9  | 2  | 4  | DQYYDILTGSVAVFDY     | 16     |       |    |              |        |            |       |          |
| neGFP+M23-H76  | 4-30-2 | /    | /  | 2  | VGGDRYWYFDL          | 11     |       |    |              |        |            |       |          |
| neGFP+M23-H80  | 3-30-3 | 6-13 | 3  | 1  | DLSDSIAAAGVGYFQH     | 16     |       |    |              |        |            |       |          |
| neGFP+M23-H88  | 3-15   | 1-26 | 2  | 6  | DRVGGSSYYYYGMDV      | 15     |       |    |              |        |            |       |          |
| neGFP+M23-H91  | 3-33   | 2-21 | 2  | 6  | DGQYCGGDCYSPYYYYGMDV | 21     |       |    |              |        |            |       |          |

RF, reading frame: # antibody failed to be expressed

- non reactive; +, reactive

c, diffuse cytoplasmic staining; N, nuclear staining, F, cytoplasmic fibers; V, vesicles

**Table S30:** Repertoire and reactivity of antibodies from GFP-negative new emigrant B cells of Mouse #23

| Ig            | HEAVY  |      |    |    |                        |        | LIGHT |    |             |        |      | REACTIVITY |          |  |
|---------------|--------|------|----|----|------------------------|--------|-------|----|-------------|--------|------|------------|----------|--|
|               | VH     | D    | RF | JH | CDR3(aa)               | Length | Vk    | Jk | CDR3(aa)    | Length | Poly | HEp-2      | Staining |  |
| neGFP-M24-K51 | 4-31   | 5-5  | 2  | 4  | EMGMAAGYSYGFYD         | 14     | 1-17  | 3  | LQHNSYPFT   | 9      | +    | -          | -        |  |
| neGFP-M24-K56 | 3-53   | /    | /  | 4  | DRGEFDY                | 7      | 3-15  | 2  | QQYNNWPLYS  | 10     | +    | +          | -        |  |
| neGFP-M24-K57 | 3-48   | 1-7  | 3  | 4  | GRGITGTNYFDY           | 12     | 3-20  | 3  | QQYGSSPPFT  | 10     | -    | -          | -        |  |
| neGFP-M24-K58 | 3-33   | 6-6  | 3  | 4  | DSSVVAARFDY            | 11     | 1-39  | 3  | QQSYSTPFT   | 9      | -    | +          | -        |  |
| neGFP-M24-K59 | 3-33   | 7-27 | 3  | 4  | EGTGFDY                | 7      | 1-5   | 4  | QQYNSYSPLT  | 10     | +    | +          | -        |  |
| neGFP-M24-K61 | 1-2    | 3-10 | 2  | 5  | DLREYKGDWFDP           | 12     | 3-20  | 4  | QQYGSSPPLT  | 10     |      |            |          |  |
| neGFP-M24-K63 | 3-7    | 3-10 | 2  | 4  | DGAYYYGSGSSTFDY        | 15     | 3-20  | 3  | QQYGSSLFT   | 9      | -    | -          | -        |  |
| neGFP-M24-K64 | 3-7    | 3-22 | 2  | 4  | GRRNFSRGDYDSSGYTTPFDY  | 23     | 1-5   | 2  | QQYNSYSPNS  | 10     | -    | -          | -        |  |
| neGFP-M24-K65 | 3-30   | 2-8  | 2  | 3  | DKTGASRLGYCTNGVCPDAFDI | 22     | 3-15  | 2  | QQYNNWPPYS  | 10     | -    | +          | -        |  |
| neGFP-M24-K67 | 3-21   | 6-19 | 2  | 3  | DSGYSSGWSHDAFDI        | 15     | 3-20  | 1  | QQYGSSPRT   | 9      | -    | +          | -        |  |
| neGFP-M24-K68 | 1-46   | 6-13 | 3  | 4  | DWPGAAGLDY             | 11     | 3-20  | 4  | QQYGSSPPLT  | 10     | -    | -          | -        |  |
| neGFP-M24-K71 | 4-34   | 3-22 | 3  | 3  | GLFITMIVVGDFAFDI       | 15     | 2-24  | 2  | MQATQFPRT   | 9      |      |            |          |  |
| neGFP-M24-K72 | 1-2    | 2-2  | 3  | 4  | DKIVVVAAMGGNYFDY       | 17     | 1-8   | 3  | QQYYSYPLFT  | 10     | +    | +          | -        |  |
| neGFP-M24-K75 | 3-48   | 1-26 | 1  | 3  | ERWELRTDAFDI           | 12     | 3-15  | 2  | QQYNNWPPYS  | 10     | -    | +          | -        |  |
| neGFP-M24-K76 | 3-7    | 2-15 | 3  | 3  | DGAGVVVAATLLDDAFDI     | 19     | 3-20  | 4  | MQGTHWPLT   | 9      | -    | -          | -        |  |
| neGFP-M24-K84 | 3-30   | 6-6  | 3  | 4  | ISSIAALPDY             | 10     | 1-17  | 4  | LQHNSYPLT   | 9      |      |            |          |  |
|               | VH     | D    | RF | JH | CDR3(aa)               | Length | Vλ    | Jλ | CDR3(aa)    | Length | Poly | HEp-2      | Staining |  |
| neGFP-M24-L54 | 3-7    | 3-16 | 2  | 3  | KNWGWCYAFDI            | 11     | 2-14  | 3  | SSYTSSTGV   | 10     | -    | +          | -        |  |
| neGFP-M24-L60 | 4-30-4 | 3-16 | 1  | 3  | LNGLGAFDI              | 9      | 1-47  | 3  | AAWDDSLSGWV | 11     | -    | -          | -        |  |
| neGFP-M24-L79 | 3-9    | 3-3  | 1  | 4  | DIRFLEWFDY             | 10     | 3-21  | 1  | QVWDSSTDHYV | 11     | -    | -          | -        |  |
| neGFP-M24-L80 | 1-2    | 1-26 | 1  | 4  | DTAGGELLPYYFDY         | 14     | 2-23  | 2  | CSYAGSSTLV  | 10     | -    | -          | -        |  |
| neGFP-M24-L83 | 5-10   | 4-11 | 1  | 4  | LLVGRGLQKHYYFDY        | 15     | 2-14  | 2  | SSYTSSTTVV  | 10     | +    | +          | -        |  |
| neGFP-M24-L89 | 1-8    | 6-13 | 3  | 4  | GRAAGGIDY              | 9      | 8-61  | 3  | VLYMGSGIWW  | 10     | -    | -          | -        |  |
| neGFP-M24-L90 | 3-11   | 3-10 | 3  | 5  | IITMVRGVIITYNWFDP      | 17     | 2-23  | 2  | CSYAGSSTFVV | 11     | -    | -          | -        |  |
| neGFP-M24-L94 | 1-8    | 7-27 | 2  | 4  | GNWDGGLFHY             | 10     | 1-51  | 2  | GTWDSLSAVV  | 11     |      |            |          |  |
|               | VH     | D    | RF | JH | CDR3(aa)               | Length |       |    |             |        |      |            |          |  |
| neGFP-M24-H50 | 3-21   | 6-19 | 2  | 2  | PGYSSGWDYWYFDL         | 14     |       |    |             |        |      |            |          |  |
| neGFP-M24-H52 | 4-61   | 1-26 | 3  | 3  | EDIVGAIRRAFDI          | 13     |       |    |             |        |      |            |          |  |
| neGFP-M24-H55 | 1-2    | 1-26 | 2  | 3  | DGGSYSAFDI             | 10     |       |    |             |        |      |            |          |  |
| neGFP-M24-H70 | 3-30-3 | 6-6  | 3  | 4  | DLSPNLIAARDAIDY        | 15     |       |    |             |        |      |            |          |  |
| neGFP-M24-H73 | 3-33   | /    | /  | 3  | GLGRATSYGDAFDI         | 14     |       |    |             |        |      |            |          |  |
| neGFP-M24-H78 | 3-23   | /    | /  | 4  | DRPVDY                 | 6      |       |    |             |        |      |            |          |  |
| neGFP-M24-H80 | 1-2    | 1-26 | 1  | 4  | DTAGGELLPYYFDY         | 14     |       |    |             |        |      |            |          |  |

RF, reading frame: # antibody failed to be expressed

- non reactive; +, reactive

c, diffuse cytoplasmic staining; N, nuclear staining, F, cytoplasmic fibers; V, vesicles

**Table S31:** Repertoire and reactivity of antibodies from GFP-positive new emigrant B cells expressing PTPN22 shRNA from Mouse #23

| Ig             | HEAVY  |      |    |    |                        |        | LIGHT |    |             |        |      | REACTIVITY |          |  |
|----------------|--------|------|----|----|------------------------|--------|-------|----|-------------|--------|------|------------|----------|--|
|                | VH     | D    | RF | JH | CDR3(aa)               | Length | Vκ    | Jκ | CDR3(aa)    | Length | Poly | HEp-2      | Staining |  |
| neGFP+M24-K1   | 3-30-3 | 6-19 | 2  | 3  | GRQVGGGWKDAFDI         | 14     | 3-20  | 4  | QQYGSSPPLT  | 10     | -    | +          | -        |  |
| neGFP+M24-K4   | 4-34   | 6-19 | 2  | 4  | GLWSEGVYYFDY           | 12     | 2D-29 | 4  | MQSIQLPLT   | 9      | -    | -          | -        |  |
| neGFP+M24-K5   | 1-69   | 1-26 | 3  | 3  | HGGSQPQIGVATLAFDI      | 17     | 3-15  | 4  | QQYNNWPLT   | 9      | +    | +          | -        |  |
| neGFP+M24-K6   | 4-34   | 4-17 | 3  | 5  | GTGTVTTNWFDP           | 12     | 3-20  | 2  | KRYGNSPYT   | 9      | -    | -          | -        |  |
| neGFP+M24-K8   | 3-15   | /    | /  | 6  | DRLHYYYYYMDV           | 13     | 3-20  | 3  | QQYGSSPFT   | 9      | -    | +          | -        |  |
| neGFP+M24-K11  | 4-34   | /    | /  | 4  | GEGVLGY                | 7      | 1-8   | 1  | QQYYSYPRT   | 9      | -    | +          | -        |  |
| neGFP+M24-K15  | 3-30   | 5-24 | 3  | 4  | SQFLREMATIRNLTDDY      | 19     | 1-16  | 2  | QQYNSYPRT   | 9      | -    | -          | -        |  |
| neGFP+M24-K22  | 3-33   | 6-13 | 3  | 4  | EGAAAGTSYFDY           | 13     | 3-11  | 3  | QQRSTWPPFT  | 10     | -    | -          | -        |  |
| neGFP+M24-K28  | 3-15   | 7-27 | 1  | 4  | DGLGIRGVADY            | 11     | 1-39  | 3  | QQSYSTPFT   | 9      | -    | -          | -        |  |
| neGFP+M24-K29  | 5-10-1 | 4-11 | 3  | 4  | HGSRPVTTYDY            | 11     | 1-9   | 2  | QQLNSYPYT   | 9      | -    | -          | -        |  |
| neGFP+M24-K31  | 3-15   | /    | /  | 3  | SGTGAFDI               | 8      | 1D-33 | 3  | QQYDNLPLFT  | 11     | -    | -          | -        |  |
| neGFP+M24-K34# | 3-30-3 | 1-26 | 1  | 1  | VFLGSVRELLAEYFQH       | 16     | 3-11  | 4  | QQRSNWPRLT  | 10     |      |            |          |  |
| neGFP+M24-K38# | 3-21   | 7-27 | 1  | 3  | AWGSDAFDI              | 10     | 3-20  | 3  | QQYGSSPPFT  | 10     |      |            |          |  |
|                | VH     | D    | RF | JH | CDR3(aa)               | Length | Vλ    | Jλ | CDR3(aa)    | Length | Poly | HEp-2      | Staining |  |
| neGFP+M24-L22  |        |      |    |    | See Kappa              |        | 2-14  | 2  | SSYTSSSTVV  | 10     | -    | -          | -        |  |
| neGFP+M24-L23  | 3-33   | 3-3  |    | 3  | TISDAFDI               | 8      | 2-14  | 2  | SSYTSSSTLV  | 10     | -    | -          | -        |  |
| neGFP+M24-L25  | 4-4    | 1-26 | 2  | 4  | DEGHSGSYFDY            | 11     | 3-9   | 2  | QVWDSSTVV   | 9      | -    | -          | -        |  |
| neGFP+M24-L26  | 3-21   | /    | /  | 3  | DPGDAFDI               | 8      | 1-44  | 3  | AAWDDSLNVVW | 11     | -    | -          | -        |  |
| neGFP+M24-L27  | 3-7    | /    | /  | 4  | KRGVFDY                | 7      | 2-14  | 2  | SSYTSSSTVV  | 10     | -    | -          | -        |  |
| neGFP+M24-L35  | 1-2    | 6-6  | 2  | 6  | DSPIEYSSSSGPIYYYYYGMDV | 22     | 2-8   | 1  | SSYAGSNNYV  | 10     | -    | -          | -        |  |
| neGFP+M24-L40  | 3-33   | 1-26 | 2  | 4  | EGGDSGSYFDY            | 12     | 3-25  | 3  | QSADSSGTYWV | 11     | -    | -          | -        |  |
| neGFP+M24-L44  | 3-30   | 3-22 | 3  | 4  | ASARIVVITNVDY          | 14     |       |    |             |        |      |            |          |  |

RF, reading frame: # antibody failed to be expressed

- non reactive; +, reactive

c, diffuse cytoplasmic staining; N, nuclear staining, F, cytoplasmic fibers; V, vesicles
